1 **Integrated role of microRNA-30e-5p through targeting negative regulators of innate**  
2 **immune pathways during HBV infection and SLE**

3

4 Richa Mishra<sup>1</sup>, Sanjana Bhattacharya<sup>1</sup>, Bhupendra S Rawat<sup>2</sup>, Ashish Kumar<sup>1</sup>, Akhilesh Kumar<sup>1</sup>,  
5 Kavita Niraj<sup>3</sup>, Ajit Chande<sup>4</sup>, Puneet Gandhi<sup>3</sup>, Dheeraj Khetan<sup>5</sup>, Amita Aggarwal<sup>6</sup>, Seiichi Sato<sup>7</sup>,  
6 Prafullakumar Tailor<sup>2</sup>, Akinori Takaoka<sup>7</sup>, Himanshu Kumar<sup>1,8\*</sup>

7

8 **Affiliations:** 1. Department of Biological Sciences, Laboratory of Immunology and Infectious  
9 Disease Biology, Indian Institute of Science Education and Research (IISER) Bhopal, Bhopal-  
10 462066, MP, India; 2. Laboratory of Innate Immunity, National Institute of Immunology (NII), New  
11 Delhi-110067, India; 3. Department of Research (Medical Biotechnology), Bhopal Memorial  
12 Hospital & Research Centre (BMHRC), Bhopal-462038, MP, India; 4. Department of Biological  
13 Sciences, Molecular Virology Laboratory, Indian Institute of Science Education and Research  
14 (IISER) Bhopal, Bhopal-462066, MP, India; 5. Department of Transfusion Medicine, Sanjay Gandhi  
15 Post Graduate Institute of Medical Sciences (SGPGIMS), Lucknow-226014, UP, India; 6.  
16 Department of Clinical Immunology and Rheumatology, Sanjay Gandhi Post Graduate Institute of  
17 Medical Sciences (SGPGIMS), Lucknow-226014, UP, India; 7. Division of Signaling in Cancer and  
18 Immunology, Institute for Genetic Medicine, Hokkaido University, Sapporo, Japan; 8. Laboratory of  
19 Host Defense, WPI Immunology, Frontier Research Centre, Osaka University, Osaka 5650871,  
20 Japan.

21

22 **\*Corresponding author:** H Kumar, Department of Biological Sciences, Laboratory of Immunology  
23 and Infectious Disease Biology, Indian Institute of Science Education and Research (IISER) Bhopal,  
24 AB-3, Room No. 220, Bhopal By-pass Road, Bhauri, Bhopal 462066, MP, India. Tel: +91 755  
25 6691413; Fax: +91 755 669 2392; E-mail: [hkumar@iiserb.ac.in](mailto:hkumar@iiserb.ac.in)

26 **Abstract**

27 Precise regulation of innate immunity is crucial for the development of appropriate host  
28 immunity against microbial infections and the maintenance of immune homeostasis. The  
29 microRNAs are small non-coding RNA, post-transcriptional regulator of multiple genes and  
30 act as a rheostat for protein expression. Here, we identified microRNA(miR)-30e-5p (miR-  
31 30e) induced by the hepatitis B virus (HBV) and other viruses that act as a master regulator  
32 for innate immune responses. Moreover, pegylated type I interferons treatment to HBV  
33 patients for viral reduction also reduces the miRNA. Additionally, we have also shown the  
34 immuno-pathological effects of miR-30e in systemic lupus erythematosus (SLE) patients and  
35 SLE mouse model. Mechanistically, the miR-30e targets multiple negative regulators namely  
36 *TRIM38*, *TANK*, *ATG5*, *ATG12*, *BECN1*, *SOCS1*, *SOCS3* of innate immune signaling  
37 pathways and enhances innate immune responses. Furthermore, sequestering of endogenous  
38 miR-30e in PBMCs of SLE patients and SLE mouse model respectively by the introduction  
39 of antagomir and locked nucleic acid based inhibitor significantly reduces type I interferon  
40 and pro-inflammatory cytokines. Collectively, our study demonstrates the novel role of miR-  
41 30e in innate immunity and its prognostic and therapeutic potential in infectious and  
42 autoimmune diseases.

43

44

45

46

47

48

## 49 **Introduction**

50 The host innate immunity is an evolutionarily conserved defense system against microbial  
51 threats. These microbes express signature molecule known as pathogen-associated molecular  
52 patterns (PAMPs) which are sensed by host's effectively conserved sensors known as  
53 pattern-recognition receptors (PRRs) in various compartments of cells. The coordinated  
54 interactions among them, activate a complex cascade of signaling pathways resulting in the  
55 development of innate immune responses for the elimination of invading microbes, through  
56 production of pro-inflammatory cytokines, type I and III interferons (IFNs) and chemokines,  
57 recruitment of immune cells and trigger various types of cell death<sup>1</sup>. These PRRs also interact  
58 with some host endogenous molecules known as danger-associated molecular patterns  
59 (DAMPs) and initiate innate immune responses without microbial infection and may  
60 establish or trigger autoimmune diseases<sup>2</sup>.

61 The micro RNA (miRNA) is a class of small non-coding RNA (18-22 nucleotide) that fine-  
62 tune protein expression through direct interaction with 3'UTR of the gene transcript<sup>3</sup>.  
63 miRNA interacts with target transcript through base pairing and initiates degradation or  
64 blocking of translation machinery via multiprotein complex known as RNA-induced  
65 silencing complex (RISC)<sup>4</sup>. It has been reported that a single miRNA has multiple mRNA  
66 targets and regulate cell signaling cascades and cellular responses during viral infections<sup>5</sup>.  
67 Several viruses evade immunity and establish infection by perturbing the host cellular  
68 miRNA expression or expressing viral(v)-miRNA upon infection<sup>6</sup>. In contrast, it has been  
69 reported that several host miRNAs restrict viral replication by targeting viral genome or those  
70 host genes which are essential for viral replication<sup>7,30</sup>. In this study, we have identified miR-  
71 30e induced by DNA and RNA viruses such as Hepatitis B virus (HBV), Human

72 cytomegalovirus (HCMV), New Castle disease virus (NDV) and Sendai virus (SeV) in  
73 primary cells such as human PBMCs and various mammalian cell lines. Notably, higher  
74 miR-30e levels were also detected in the serum of therapy naive HBV patients.  
75 Introduction of miR-30e into the cells promote production of pro-inflammatory cytokines,  
76 type I/III IFNs and globally enhances the innate immunity and therefore reduces viral load.  
77 However, HBV patients treated with pegylated type I IFNs present reduced HBV infection  
78 in terms of viral load and disease pathology, and significant concomitant reduction in  
79 miRNA30e levels, illuminating the correlation of innate immune responses and miR-30e  
80 expression. We utilized bioinformatic tools and transcriptomic approaches to identify miR-  
81 30e targets negative regulators namely *TRIM38*, *TANK*, *ATG5*, *ATG12*, *BECN1*, *SOCS1* and  
82 *SOCS3* of PRRs-mediated signaling pathways such as TLR, RLR and DNA sensing innate  
83 immune signaling pathways<sup>8,9</sup>. Additionally, we showed miR-30e and 3'UTR of negative  
84 regulator transcripts makes a complex with Argonaute 2 (Ago2) protein, a component of  
85 RNA induced silencing complex (RISC), reduces transcript levels and subsequently protein  
86 expression thereby enhances innate immune responses. In contrast, patients with Systemic  
87 Lupus Erythematosus (SLE), a disease characterized by Type I IFN signature had higher  
88 expression of miR-30e<sup>10,11</sup>. Further, NZB/NZW F1 hybrid, an animal model of lupus<sup>31</sup> also  
89 showed increased expression of miR-30e. In connection, the introduction of miR-30e  
90 antagomir into PBMCs of SLE patients and lock nucleic acid (LNA) inhibitor for miR-30e  
91 through intra-orbital injection to the SLE mouse model significantly reduces type I IFNs and  
92 proinflammatory cytokines and moderately enhances the innate negative regulation. In  
93 conclusion, our study, proposes the novel role of miR-30e in innate immunity and its  
94 prognostic and therapeutic potential in HBV and SLE.

95 **Results**

96 **miRNA-30e is induced upon viral infection and enhances innate antiviral responses to**  
97 **inhibit viral replication.**

98 To investigate the miRNAs involved in regulation of innate immune response during viral  
99 infections, we performed unbiased data analyses on previously published reports and miRNA  
100 microarray GEO datasets as shown in schematic workflow (Fig. S1A). In particular, the  
101 miRNA reports in H5N1 or Epstein Barr virus were analyzed for upregulated miRNAs.  
102 These upregulated miRNAs were compared to our previous miRNA profiling dataset from  
103 NDV infection in HEK293T cells (GSE65694). Upon comparison with NDV infection we  
104 selected miR-30e-5p, miR-27a-3p and mir-181a/2-3p as the common miRNAs across  
105 miRNA profiles related to viral diseases (Fig. S1B). Our analysis identified miR-30e as a  
106 unique miRNA that was predicted to target various PRR-mediated signaling regulators  
107 during negative regulation of innate immune responses (Fig. S1C) and was upregulated in  
108 viral infections moreover its mature form was highly conserved among the wide range of  
109 species (Fig. S1D). Additionally, datasets for H1N1 infection in mice (GSE69944), H5N1  
110 infection in human lung carcinoma cells (A549 cells, GSE96857) and HBV infected liver  
111 tissues of hepatitis patients (GSE21279) were also analyzed by GEO2R package for  
112 upregulated miRNAs and among all upregulated miRNAs, miR-30e upregulation is  
113 represented here (Fig. S1E). The expression of miR-30e was upregulated during viral  
114 infections or stimulation with PAMPs *in-vitro* in various cell-lines (Fig. S2A-F). At the  
115 transcriptional level, miR-30e promoter activity was moderately enhanced by NDV but was  
116 unaffected by *IFN* $\beta$  or *TNF* $\alpha$  stimulation which activated the *ISRE* and *NF* $\kappa$ *B* promoters  
117 respectively, suggesting that miR-30e expression might be induced by the viral infections

118 but not by the cytokines produced during infection (Fig. S2G-L). To understand the clinical  
119 relevance, induction of miR-30e was tested in the cohort of 51 non-treated HBV patients  
120 (demographic details mentioned in Table T1). To this end, the expression of miR-30e was  
121 evaluated from serum samples of therapy naive chronic hepatitis B (CHB) patients in  
122 comparison with healthy controls, and significantly elevated levels of miR-30e were detected  
123 in HBV patients (Fig. 1A). Similar results were obtained with HepG2 cell line treated with  
124 serum from HBV patients (HBV PS) for different time points, as shown (Fig. 1B), the  
125 induction of miR-30e enhanced significantly at *1dpi*, *2dpi* and *3dpi* (days post infection) with  
126 maximum expression at *3dpi*. Additionally, miR-30e mimic (miR-30e) inhibited HBV  
127 infection in HepG2 cells treated with serum from HBV patients or HepG2215 cells, stably  
128 expressing HBV replicon cells as compared to control miRNA (miR-NC1) treated cells as  
129 tested by HBV-specific RNA and DNA (Fig. 1C and D) (Fig. S3A). Interestingly, ectopic  
130 expression of miR-30e significantly reduced the HBV replication in HepG2-NTCP cells as  
131 tested by HBV RNAs and HBV pgRNA (Fig. S3B). Notably, we found significant elevated  
132 levels of HBV DNA and HBV covalently closed circular DNA in HBV patient serum  
133 infected HepG2 cells and stably expressing HBV replicon HepG2215 cells compared to  
134 uninfected HepG2 cells (Fig S3C) to show the infection in cells. On another hand, expression  
135 of *IFNλ1* and *IFIT1* was enhanced in HepG2 and HepG2215 cells, respectively, in the  
136 presence of miR-30e (Fig. 1C and D) (Fig. S4A). Similarly, HBV infection in HepG2-NTCP  
137 cells (liver hepatoma cell line permissive for HBV infection) overexpressing miR-30e  
138 (ectopic), elevated IFNλ1 transcript (Fig. S4B). To study whether miR-30e was involved in  
139 controlling RNA virus infection, we infected human PBMCs (hPBMCs) with NDV to  
140 quantify the expression of miR-30e. We found that NDV infection elevated the expression

141 of miR-30e in time-dependent manner (Fig. 1E). Additionally, PBMCs infected with NDV  
142 in presence of miR-30e showed a significant reduction in NDV replication with a  
143 concomitant elevation of *IL6* expression whereas miR-30e inhibitor (AmiR-30e) reversed  
144 this phenomenon (Fig. 1F). Similar inhibition of viral replication was observed in multiple  
145 cell lines infected with NDV in the presence of miR-30e or AmiR-30e (Fig. S3D-F).  
146 Comparable results for antiviral responses were obtained after NDV infection in different  
147 cell-types at transcript level and protein levels (Fig. S4C-I) in presences of miR-30e and it  
148 also activate *ISRE*, *IFN $\beta$*  and *NF $\kappa$ B* promoters as tested by luciferase assay (Fig. S4J-L).  
149 Furthermore, miR-30e presence reduces NDV replication in terms NDV protein as tested by  
150 NDV-specific antibody estimated by western blot, microscopy and FACS analysis  
151 respectively (Fig. 1G-H and S3G). To further validate the function of miR-30e in controlling  
152 viral infections, we quantified the expression of miR-30e upon Sendai virus (SeV) infection  
153 in A549 cells. SeV induced the expression of miR-30e (Fig.1I) and ectopic expression of  
154 miR-30e (miR-30e mimic) inhibited the SeV replication as shown by qRT-PCR and FACS  
155 analysis (Fig. 1J-K) through enhancing antiviral genes such as the expression of *IFIT1* (Fig.  
156 1J).

157 Next, role of miR-30e on DNA virus replication was determined, to this end, HFF cells were  
158 infected with DNA virus, HCMV, alone or along with miR-30e or miR-NC1. The viral  
159 replication was significantly reduced in the presence of miR-30e compared to the miR-NC1  
160 treated HFF cells as quantified by HCMV transcript encoding viral glycoprotein gene (Gly  
161 B) by real-time PCR and analyzed by microscopy (Fig. S5A) and additionally the transcript  
162 levels of *IL-6* was enhanced (Fig. S5B).

163 To investigate, how miR-30e influence antiviral responses upon treatment with pure viral  
164 ligand such as poly IC and ssRNA, different cells including human PBMCs were stimulated  
165 along with miR-30e. The expression of various cytokines and ISGs such as *IFN $\beta$* , *IP-10*, *IL-*  
166 *6* and *IFIT1* were elevated upon poly IC or ssRNA stimulation along with miR-30e  
167 transfection and similar results were found for the promoter activity of *ISRE* and *IFN $\beta$*  in  
168 presence of miR-30e (Fig. S6A-H). Collectively, our results demonstrate that miR-30e is  
169 upregulated in during virus infection and miR-30e inhibits viral replication by promoting the  
170 expression of innate antiviral genes.

171

### 172 **miR-30e globally enhances innate immune responses during virus infection.**

173 To investigate the effect of miR-30e on innate immune responses interms of innate immune  
174 immune genes upon virus infection, A549 cells were either mock transfected, or transfected  
175 with miR-NC1 and miR-30e for 24 hours, followed by infection with NDV for 24 hours and  
176 finally subjected to whole transcriptome sequencing using an illumina next-generation  
177 sequencer (NGS) and analyzed for differentially expressed genes as shown in the schematic  
178 (Fig. 2A, S7A). Notably, the transfection efficiency of miR-30e in both replicates was  
179 confirmed by qRT-PCR using miR-30e-5p Taqman and reduction in viral infection was  
180 confirmed by quantifying the NDV RNA in both the replicates to establish further analysis  
181 as per our previous findings (Fig. 2B). Principal component analysis for the samples resulted  
182 in formation of three distinct groups (miR-30e, miR-NC1 and uninfected) according to their  
183 treatment (Fig. 2C). Additional analysis of transcriptomic data showed that 1179 genes were  
184 significantly upregulated and 1206 genes were significantly downregulated upon miR-30e  
185 transfection in comparison to miR-NC1 (Fig. 2D (represented in volcano plot) and Fig. S7B



186 (represented in MA plot and shown in Table T2). Moreover, KEGG pathway analysis of  
187 significantly upregulated genes, upon miR-30e treatment and NDV infection indicated  
188 enrichment of genes belonging to key cellular mechanisms namely: cell cycle, NOD-like  
189 receptor signaling pathway, MAPK signaling pathway, TLR signaling pathway, RLR  
190 signaling pathway, PI3K-AKT signaling pathway, cytokine-cytokine receptor interaction  
191 pathway, NF-kappa B signaling pathways, TNF signaling pathway, etc. (Fig. 2E). Relative  
192 expression levels of top genes involved in these pathways is represented by heat map (Fig.  
193 S7C). Intriguingly, we noticed that a significant number of interferons stimulated genes  
194 (ISGs) like *IRF3*, *IRF7*, *CXCL10 (IP10)*, *IFIT1*, *MX1*, *IL6*, *OAS1* among others were also  
195 predominantly upregulated (Fig. 2F) that confirmed with the initial findings of the study.  
196 Furthermore, our NGS results were verified by quantifying the expression level of type 1  
197 interferon *IFN $\beta$* , interferon stimulated genes: *IFIT1* and *OAS1* and pro-inflammatory  
198 cytokines: *IL6* and *IP10*. These outcomes intricate strongly that miR-30e reduces the viral  
199 replication by enhancing the innate immune responses upon activation of various signaling  
200 cascades. Additionally, miR-30e impacts innate immune responses during viral infection,  
201 prompted us to investigate transcriptome and gain mechanistic insight for the target of miR-  
202 30e.

203

### 204 **miR-30e targets negative regulators of TLRs, RLRs, DNA sensing and interferon** 205 **signaling pathways**

206 To investigate underlying molecular mechanism for the reduction of viral burden and  
207 enhanced antiviral innate immune responses by miR-30e, we conducted unbiased rigorous  
208 screening using various bioinformatic tools for the identification of innate immune genes.

209 To filter the genes transcript targeted by miRNA, certain criteria for screening were applied.  
210 First of all, common genes involved in innate immune regulation upon viral infections and  
211 targeted by miR-30e were identified and subjected to KEGG pathway analysis. The analysis  
212 revealed that majority of genes (*TRIM38*, *TANK*, *ATG5*, *ATG12*, *BECN1*, *SOCS1*, *SOCS3*,  
213 *TRIM13* and *EPG5*) were involved in negative/down regulation of pattern recognition  
214 receptors (PRRs)-mediated signaling pathways (Fig. 3A). Additionally, our NGS analysis  
215 demonstrated that expression of identified negative regulators during NDV infection were  
216 reduced upon miR-30e treatment as compared to miR-NC1 group (Fig. 3B). This further  
217 concludes that negative regulators were targeted by mir-30e. The binding efficiency for miR-  
218 30e and identified targets genes are significantly high to alter any physiological functions by  
219 the miRNA that was tested by different *in-silico* tools such as miRanda, DIANA, targetscan,  
220 miRDB and BiBiServ2\_RNAhybrid as reported (Table T3). Although few targets of miR-  
221 30e are not negative regulators however, binding energy for those target transcript and  
222 miRNA assembly are low (Fig. S8) and therefore, it may not significantly alter the cellular  
223 function. To test specificity of miRNA with the 3'UTR of identified negative regulator genes,  
224 the 3'UTR of the gene were cloned downstream of luciferase gene under the CMV promoter  
225 and performed luciferase assay. It was found that miR-30e significantly reduced luciferase  
226 activity of investigated genes compared to control miR (Fig. 3C). In contrast, introduction  
227 of mutation in cloned 3'UTR by site directed mutagenesis (SDM) did not change the  
228 luciferase activity in presence of miR-30e and it was comparable with miR-NC1 (Fig. S9A),  
229 moreover, it could be noted here that, the target sequence in each negative regulator genes  
230 were same. Additionally, we knockdown these negative regulators in HEK-293T cells and  
231 Infected them with NDV to further estimated the level of *IFN $\beta$* , which clearly elucidated

232 their inhibitory effect on the mRNA levels of *IFN $\beta$*  within a cell, this effect was found to be  
233 significant with respect to the majority of the targets (Fig. 3D). And observed that the  
234 production of *IFN $\beta$*  is comparable after knockdown of target genes and introduction of miR-  
235 30e into the cells during viral infection suggesting the pivotal role of miR-30e in suppression  
236 of negative regulators transcripts. Furthermore, we scanned the 3'UTRs of identified  
237 negative regulators for RNA binding site for Ago2 protein in CLIP database, which is a key  
238 component of the miRNA-mediated silencing complex (RISC) and found that the miR-30e  
239 strongly complexes with the target genes as shown in (Table T4). To validate, miR-30e and  
240 negative regulator transcripts (*TRIM38*, *TANK*, *ATG5*, *ATG12*, *BECN1*, *SOCS1* and *SOCS3*)  
241 interaction, Ago2 pull-down assay was performed as shown in schematic diagram (Fig. 3E)  
242 and found that introduction of miR-30e significantly enriches the transcript of negative  
243 regulators compared to the NDV alone infection or NDV infection along with control  
244 miRNA treated cells suggesting that miRNA directly interact with the transcript through the  
245 formation of RISC.

246 Next, the expression of identified negative regulators were examined in A549 cells upon  
247 NDV infection and found that at 12 hours there was increased in the expression of *TRIM38*,  
248 *TANK*, *ATG5*, *ATG12*, *BECN1*, *SOCS1* and *SOCS3* transcript and it was reduced at 24 hours  
249 due to induction of miR-30e as shown in left panel (Fig. S9B). Additionally, ectopic  
250 expression of miR-30e reduced the expression level of these targets in A549 cells compared  
251 to the control after NDV infection (Fig. S9C). Consistent with these results induction of  
252 targets was also reduced in HBV-patient serum treated HepG2 cells, HepG2215 cells (stably  
253 expressing HBV replicon cells and HepG2-NTCP cells infected with HBV, in presences of  
254 miR-30e compared to the control miRNA transfection (Fig. S10A-C), suggesting that miR-

255 30e targets these genes during HBV and NDV infection in HepG2, HepG2215, A549 cells,  
256 respectively. Similar results were obtained due to miR-30e transfection in NDV infected and  
257 poly IC treated HeLa cells (Fig. S10D-E). We not only confirmed the expression of negative  
258 regulators by analyzing transcripts but also tested for protein expression using specific  
259 antibodies by immunoblot analysis. The introduction of miR-30e significantly reduced the  
260 expression of *TRIM38*, *TANK*, *ATG12*, *BECN1*, *SOCS3* and *SOCS1* as shown (Fig. 3F).  
261 Therefore, our results strongly suggest that these key negative regulators of innate immunity  
262 are targeted by miR-30e, which are induced during virus infection and resulting to enhanced  
263 antiviral responses.

264

#### 265 **DAMPs induce miR-30e and enhance innate immune responses**

266 Our observation for induction of miR-30e and subsequent heightened innate immune  
267 responses upon viral infection or pure PAMP stimulation prompted us to investigate the  
268 ability of host DAMPs for induction of miR-30e because sustained DAMPs production in  
269 the host can lead to enhance sterile inflammation and subsequently it may establish  
270 autoimmune disease<sup>3</sup>. To this end, ex-vivo experiment was performed using hPBMCs from  
271 three healthy volunteers. The genomic DNA were extracted from a portion of hPBMCs and  
272 sonicated to make small size (approx. 110-150 bps) for efficient transfection into the cells  
273 (Fig. 4A). The cultured hPBMCs were stimulated with the extracted small size DNA and  
274 tested for the induction of miR-30e and innate immune cytokines. The DAMP stimulation  
275 significantly induces the miR-30e and expression of *IFN $\alpha$* , *IFN $\beta$* , *IFIT1*, *IL6* genes in all 3  
276 healthy volunteers (Fig. 4C-E). Next, to understand physiological significance of DAMP-  
277 induced innate immune cytokines, the DAMP-stimulated cells were infected by NDV and

278 NDV replication was measured. The dsDNA-stimulation significantly reduced the NDV  
279 replication (Fig. 4F) suggesting that inflammatory cytokines and type I interferons induced  
280 by dsDNA inhibited the viral replication. Although inhibition of viral replication could be  
281 the collective results of both dsDNA and virus-mediated induction proinflammatory  
282 cytokines, type I interferons and type I inducible genes. Finally, we examined the levels of  
283 apoptosis induced by autologous dsDNA in hPBMCs by Annexin-PI assay using FACS  
284 analysis as shown in Fig. S11A, dsDNA stimulation enhanced apoptosis compared to the  
285 mock stimulation and it is comparable to the positive control treated cells, by Camptothecin.  
286 Additionally, the levels of *TLRs 3/7/9* was estimated upon dsDNA treatment as previously it  
287 has been reported that DAMPs enhance the levels of these *TLRs*. Consistent with previous  
288 observation, we obtained similar results (Fig. S11B-D). Taken together, these results showed  
289 that DAMPs/dsDNA enhances miR-30e, innate immune responses as well as promote  
290 apoptosis and induce *TLRs*, the crucial characteristic features for the development of  
291 autoimmune disorder in co-occurrence with DAMPs/dsDNA and miR-30e might play  
292 pivotal role in autoimmune disease.

293

#### 294 **SLE patients and SLE mouse model show enhanced miR-30e expression**

295 To investigate the role of miR-30e under physiological condition, an autoimmune disease,  
296 SLE was selected because SLE patients show enhanced inflammatory cytokines, type I  
297 interferons and type I interferon-inducible cytokines production<sup>10</sup>. The SLE patients also had  
298 elevated levels of several autoantibodies particularly antinuclear and anti-dsDNA antibodies.  
299 Therefore, PBMCs were isolated from clinically verified SLE patients (P: n=13) as shown  
300 (Table T5) and healthy controls (HC: n=13) and cultured for 48 hours, the expression levels

301 of *IFN $\beta$* , *IFIT1* and *IL6* were compared by qRT-PCR. As expected, we found that the  
302 expression levels of *IFN $\beta$* , *IFIT1* and *IL6* were significantly enhanced in SLE patients  
303 compared to healthy controls (Fig. 5A). The enhanced innate immune responses prompted  
304 us to investigate the expression levels of miR-30e. Interestingly, the expression of miR-30e  
305 is significantly enhanced (several fold) in patients (n=13) compared to healthy controls  
306 (n=13). Further to confirm our observations in SLE patients, the SLE mouse model was used.  
307 The New Zealand white/black (NZW/B) mice were extensively used for SLE studies. The  
308 splenocytes from both parents NZB and/or NZW mice (n=7) mice and lupus prone F1 (F1:  
309 NZW/B n=7) generation mice were tested for the expression levels of *Ip10*, *Tnfa* and *Il6* by  
310 qRT-PCR (Fig. 5B). The F1 mice showed significantly high level of inflammatory responses  
311 compared to non-SLE parent mice. Consistent with human SLE results, the expression of  
312 miR-30e is enhanced manifold both in F1 mouse splenocytes and serum compared to the  
313 parents. Additionally, GEO dataset: GSE79240 was utilized to observe the differential  
314 expression of microRNAs during SLE, especially, miR-30e expression level, that further  
315 revealed that expression of miR-30e modestly enhanced in dendritic cells of SLE patients  
316 (n=5) compared to healthy controls (n=5) (Fig. S12A). To understand the relevance of miR-  
317 30e in another autoimmune disease, we reanalyzed the previously submitted GEO dataset  
318 (GSE55099) for Type 1 Diabetes Mellitus patients. The reanalysis unveils that the expression  
319 of miR-30e significantly enhanced in PBMCs of patients (n=12) compared to healthy  
320 controls (n=10) (Fig. S12B). Collectively, these results suggest that enhanced innate immune  
321 responses are strongly linked with miR-30e expression under physiological condition and it  
322 might also play pivotal role in immune-pathogenesis of SLE in both human and mouse  
323 model.

324 **miR-30e targets negative regulators of PRR-mediated signaling pathway in SLE**  
325 **patients and SLE mouse model**

326 The enhanced expression of inflammatory cytokines, type I IFNs and type I IFN-inducible  
327 genes along with elevated miR-30e in SLE patients and SLE mouse model prompted us to  
328 examine the levels of our previously identified negative regulators as shown (Fig. 3A-B).  
329 Additionally, it has been reported that several negative regulators of innate immunity play a  
330 crucial role in the development of autoimmune disease. As expected, the expression of  
331 negative regulators of PRR-mediated signaling pathways namely *TRIM38*, *TANK*, *SOCS1*  
332 *and SOCS3* was significantly reduced in the PBMCs of SLE patients compared to healthy  
333 controls (Fig. 6A). To support our observation, reanalysis of previously submitted GEO  
334 dataset, GSE11909 for SLE patients (n=103) and healthy controls (n=12) in PBMCs reveal  
335 that, in SLE, the identified negative regulators of innate immune signaling pathway maybe  
336 targeted by miR-30e, were significantly reduced in patients (n=103) compared to healthy  
337 controls (n=12) (Fig. S13). To confirm our observations, splenocytes from mouse model  
338 were analyzed for identified negative regulators. Consistent with human result for the  
339 expression of negative regulators, the expression of *Atg5* and *Atg12* were significantly  
340 reduced whereas expression of *Socs1* and *Socs3* was moderately reduced in SLE mouse (F1-  
341 NZW/B mice: n=7) compared to parent mice (PM-NZW-NZB: n=7) (Fig. 6B). Collectively,  
342 these results suggest that in SLE pathogenesis, in both human and mouse, enhanced  
343 expression of miR-30e might play a crucial role, by suppressing the expression of negative  
344 regulators of innate immune signaling pathway, which in turn enhance innate immune  
345 cytokines and contribute in development or severity to the disease. Therefore, manipulation  
346 of miR-30e expression might be key for the controlling SLE pathogenesis.

347

348 **Prognostic and Therapeutic potential of miR-30e**

349 To explore the prognostic and therapeutic potential of miR-30e, which modulate innate  
350 immune responses during infection and autoimmune diseases, particularly HBV infection  
351 and SLE, we tested prognostic potential of miR-30e. We validated the miR-30e expression  
352 by comparing the serum levels in pre- and post six months therapy (pegylated type I  
353 interferon) samples of HBV patients (demographic details mentioned in Table T6).  
354 Strikingly, we found significant reduction of miR-30e expression after interferon therapy  
355 (Fig. 7A), suggesting that, HBV infection triggers miR-30e over-expression in the host, to  
356 combat the which otherwise ablates upon Peg-IFN treatment, a well-established therapy that  
357 reduces the hepatitis B virus titer in patients. Additionally, GEO dataset GSE104126  
358 supports the above finding in context to miR-30e expression level, as its reanalysis revealed,  
359 that there was significant reduction in the level of miR-30e in pegylated type I interferons  
360 treated and HBsAg-loss (reduction in viral titer) patients compared to pegylated type I  
361 interferons treated and non-HBsAg loss (no change in viral titer) patients (Fig. S14).  
362 Next, we investigated the therapeutic potential of miR-30e modulator and have shown the  
363 importance of AmiR-30e (miR-30e inhibitor) that sequesters the activity of endogenous miR-  
364 30e. Our results showed that SLE patients and mouse model produce high inflammatory  
365 responses in terms of innate cytokines and it is linked to the elevated miR-30e expression  
366 (Fig. 5A) and contribute in reduction of negative regulators (Fig. 6A). Therefore, we  
367 introduce AmiR-30e into SLE patient's PBMCs. Interestingly, we found that ectopic  
368 expression of AmiR-30e sequester the expression of miR-30e in PBMCs of SLE patients and  
369 reduces the *IFN $\beta$*  expression as quantified by qRT-PCR (Fig. 7B). Next, we examined the



370 role of AmiR-30e in SLE mouse model, NZW/B. In *ex-vivo* experiment, transfection of  
371 splenocytes derived from the F1 mice (NZW/B) with AmiR-30e significantly reduces the  
372 expression levels of *Il6* and *Tnfa* compared to the control AmiR-NC1 (Fig. 7C). Furthermore,  
373 to show the stable and specific sequestering effects of microRNAs for therapeutic relevance,  
374 previously it has been published that locked nucleic acid (LNA) based chemistry to design a  
375 potent inhibitor against the microRNA has showed promising effects in *in-vivo* studies<sup>12</sup>.  
376 Therefore, finally, we performed *in-vivo* experiments to test the effects of LNA-anti-mir-  
377 30e-5p (LNA Amir-30e) on innate immune responses in SLE mice, two groups of mice each  
378 consists of four mice were injected with LNA Amir-30e or LNA negative control (LNA NC)  
379 through retro-orbital route thrice with one day interval to sequester the endogenous  
380 expression of mir-30e to measure mir-30e and gene expression levels. The expression of mir-  
381 30e in serum and splenocytes of SLE induced F1 (NZW/B) mice was significantly reduced  
382 compared to the LNA NC treated mice. Additionally, innate immune cytokines namely *Il6*  
383 and *Ip10* significantly reduced in LNA Amir-30e treated mice compared to the LNA NC. In  
384 contrast the expression of negative regulators, *Socs1* and *Socs3* significantly enhanced in  
385 LNA Amir-30e treated mice compared to the LNA NC. (Fig. 7D). Taken together these  
386 findings conclude that LNA Amir-30e found to be stable under *in-vivo* conditions and  
387 significantly inhibits the activity of mir-30e in SLE mouse model, which further reduces the  
388 inhibition/targeting of negative regulators, contributing towards controlling of SLE  
389 phenomena.

390

391 **Discussion**

392 Innate immune responses to viral infection induces the production of pro-inflammatory  
393 cytokines and type I Interferons (IFNs) through cascade of complex signaling pathways that  
394 play critical roles in development of appropriate anti-viral immunity. In contrast,  
395 dysregulation of these signaling pathway results to inefficient clearance of microbial  
396 infection, immunopathology or autoimmune diseases<sup>1,3</sup>. Therefore, the expression and  
397 activation of signaling molecules in signaling pathways are tightly regulated at  
398 transcriptional, post-transcriptional, translational and post-translational levels. The non-  
399 coding small (micro) RNAs play a pivotal role in fine tuning of protein coding genes through,  
400 stability and translation of gene transcript. Here our study identifies a novel role of miR-30e  
401 in regulation of innate immune signaling pathway during HBV infection and immuno-  
402 pathogenesis of SLE. We also demonstrated the therapeutic and prognostic potential of  
403 AmiR-30e and miR-30e in SLE and HBV infection, respectively.

404 The miR-30e identified through unbiased *in-silico* screening using GEO datasets obtained  
405 from cell lines, primary cells, mice or human patients challenged by different viruses.  
406 Although, other miRNAs such as miR-27a-3p and miR-181a/2-3p are also induced, however,  
407 their complementation potency towards mRNA-miRNA targets was manifolds lower than  
408 miR-30e. The miR-30e has been reported to be associated with cancer<sup>13-15</sup>, cardiac  
409 dysfunction<sup>16</sup>, kidney malfunction<sup>17</sup>, fatty acid deregulation, as a biomarker for SLE<sup>18</sup>, a  
410 dysregulated micro RNA during Zika virus infection<sup>19</sup> and suppressor for Dengue virus<sup>20</sup>.  
411 However, its role in innate immune signaling pathway and innate immune responses during  
412 virus infection and pathogenesis of autoimmune diseases such as SLE are not clear.

413 Our results show that miR-30e induced manifold in the serum of (n=51) therapy naive  
414 chronic hepatitis B (CHB) patients compared to healthy control (n=24). This finding was  
415 also supported by another DNA and RNA virus such as HCMV, NDV, and SeV infection or  
416 stimulation with TLR or RLR viral PAMPs such as ssRNA and poly IC to various cell lines.  
417 Ectopic expression of miR-30e in primary cells or cell lines upon subsequent DNA or RNA  
418 virus infection significantly reduces the viral load through global enhancement of innate  
419 immune responses in terms of pro-inflammatory cytokines, type I interferons and type I  
420 interferons-inducible genes as shown by NGS data analysis. The enhanced miR-30e  
421 expression in therapy naive HBV (CHB) patients might elevate innate immune responses to  
422 combat HBV infection, however, it might be insufficient to control HBV infection.  
423 Therefore, HBV patients receiving pegylated interferon were sampled post six months  
424 therapy and were found to show significant reduction of viral load and miR-30e expression  
425 highlighting the link between HBV, miR-30e and innate immune responses. To establish the  
426 role of miR-30e under physiological condition, we selected SLE as a disease model. The  
427 SLE patients show enhanced expression of miR-30e, pro-inflammatory cytokines, type I  
428 interferons or type I interferons-inducible genes. Further to confirm our observations, we  
429 exploited SLE mouse model (NZW/ NZB F1) and obtained similar results for the expression  
430 of miR-30e that were consistent with SLE patients result suggesting the correlation of miR-  
431 30e with innate immune responses in SLE under physiological condition.

432 The transcriptomic analysis of our NGS data and GEO data sets using various bioinformatics  
433 tools shows that miR-30e directly targets several signal transducers and the negative  
434 regulators such as *TRIM38*<sup>21-23</sup>, *TANK*<sup>24</sup>, *ATG5*, *ATG12*<sup>25,26</sup>, *BECN1*<sup>27</sup>, *SOCS1* and *SOCS3*<sup>28</sup>.

435 The microRNA targeting reduces the expression negative regulators and enhance the innate

436 immune responses which play pivotal role in TLR, RLR, NLR, and type I interferon  
437 signaling pathways. Although miR-30e also bind with few other gene transcripts which are  
438 not negative regulator in the innate immune signaling pathway, however, the combined mean  
439 free energy for these transcripts are lower than threshold binding energy necessary for  
440 significant change in the expression of transcripts, for subsequently affecting the outcome of  
441 signaling pathway. Notably, the expression of negative regulators such as *TRIM38*, *TANK*,  
442 *SOCS1* and *SOCS3* in SLE patients are significantly reduced. Moreover, SLE mice also show  
443 similar results for the expression of *Socs1*, *Socs3*, *Atg5* and *Atg12*. Collectively, human and  
444 mouse results illustrate that miR-30e targets negative regulators to elevate innate immune  
445 responses and dysregulation of miR-30e expression may be one of factor for the  
446 establishment of SLE or other autoimmune diseases.

447 Previously, it has been shown that SLE patients has reduced ability to degrade DNA and  
448 cellular chromatin<sup>29</sup>. Therefore, PBMCs from healthy donors were stimulated with partially  
449 degraded self-DNA and these cells showed enhanced miR-30e and innate immune responses  
450 suggesting the pathogenic role of miR-30e and suggested a link of self-DNA with the  
451 pathogenesis of SLE. In contrast, sequestering endogenous miR-30e in PBMCs of SLE  
452 patients by introducing antagomir/inhibitor significantly reduced the levels of miR-30e and  
453 innate immune responses in terms of *IFN $\beta$*  production. Additionally, introduction of locked  
454 nucleic acid (a stable form of antagomir) through retro-orbital route into SLE mice model  
455 significantly reduced mir-30e and innate immune genes expression in splenocytes whereas  
456 expression of negative regulators was enhanced, demonstrating the ability of mir-30e  
457 antagomir to reduce innate immune responses under physiological condition. Finally, our  
458 study identified miR-30e as a post-transcriptional regulator of negative regulation of PRR-

459 mediated innate immune signaling pathways and its diagnostic and prognostic potential  
460 in HBV infection. Additionally, our study demonstrated the therapeutic implications of  
461 miR-30e antagomir/inhibitor to immunologically complex autoimmune disease, SLE or  
462 possibly other autoimmune diseases.

463

464 **Materials and Methods**

465 **Ethical Statement.** Experiments were performed after approval from the Institutional  
466 Ethical Committee (IEC)-Indian Institute of Science Education and Research (IISER)  
467 Bhopal: (IISERB/IEC/Certificate/2016-IV/03), Institute Biosafety Committee (IBSC) -  
468 IISER-Bhopal: (IBSC/IISERB/2018/Meeting II/08), Bhopal Memorial Hospital & Research  
469 Centre Institutional Ethical Committee (IEC), BMHRC Research Projects/Clinical Studies  
470 (IRB/18/Research/10), Institutional Animal Ethical Committee (IAEC)-Small and  
471 Experimental Animal Facility National Institute of Immunology (NII): (IAEC#469/18) and  
472 Institutional Ethical Committee (IEC)- Sanjay Gandhi Post Graduate Institute of Medical  
473 Sciences (SGPGIMS): (2016-138-EMO-93).

474 **Human blood samples.** Blood samples from both healthy individuals and patients (HBV  
475 and SLE) were collected according to the ethics protocol in the respective hospitals by health  
476 professionals. Written informed consent was obtained from all patients and healthy  
477 participants before inclusion into the study at Bhopal Memorial Hospital & Research Center  
478 (BMHRC: for HBV samples: n = 51 Vs control samples: n = 24), Sanjay Gandhi Post  
479 Graduate Institute of Medical Sciences (SGPGIMS: for SLE samples: n = 13 Vs control  
480 samples: n = 13) and Institutional Ethical Committee (IEC)-Indian Institute of Science  
481 Education and Research (IISER) Bhopal. Reagents used for transfection/electroporation  
482 were Lipofectamine 2000, miRNA mimics, miRNA inhibitors, controls mimic/inhibitors and  
483 for RNA isolation were Trizol/Trizol-LS. All reagents used were procured from  
484 Ambion/Invitogen.

485 **Mice.** Systemic Lupus Erythematosus (SLE) mouse model were procured from the Jackson  
486 Laboratory, USA and further breeding was done in approved pathogen- free, small animal

487 facility of National Institute of Immunology (NII). SLE mouse strains were used as follows:  
488 New Zealand White (NZW) and New Zealand Black (NZB) non-lupus bearing parent mice  
489 crossed to generate NZW/B F1 progenies, lupus induced mice. All the mice used in the study  
490 were from 6 to 12 weeks without any genders bias. Dendritic cell enriched low density  
491 fraction of splenocytes were prepared as described earlier<sup>40,41</sup>. Spleens were harvested and  
492 single cell suspension of splenocytes were cultured in RPMI based media containing either  
493 50nM of miR-30e antagomir and miR-NC1 antagomir (transfected through RNAimax  
494 transfecting reagent) and plated in 24-well plate ( $3 \times 10^6$  cells/well) maintained at 37°C+5%  
495 CO<sub>2</sub>. For the *in-vivo* experiments, four- 6 to 12 weeks old NZW/B F1 mice were randomly  
496 assigned into two groups. The mice in each group received four consecutive intravenous  
497 (retro-orbital) injections of either LNA anti-miR-30e or LNA negative control (scrambled)  
498 compounds, formulated in TE Buffer (10mM Tris (pH: 7.5), 0.01mM EDTA) as per 25 mg  
499 LNA/kg mouse body weight on consecutive days as described previously. The mice were  
500 sacrificed within 24 h after the last dose. At selected time points, cells were harvested and  
501 relative abundances of miR-30e and other transcripts were quantified using qRT-PCR.

502 **Cell lines, virus infections, transfection and reagents.** A549 human alveolar basal  
503 epithelial cells (Cell Repository, NCCS, India), HEK293T/HEK293 human embryonic  
504 kidney cells (ATCC CRL-3216), Raw 264.7 (Cell Repository, NCCS, India), HeLa cervical  
505 cancer cells (Cell Repository, NCCS, India), HepG2-NTCP cells (from Dr. Takaji Wakita  
506 National Institute of Infectious Diseases Tokyo, Japan), HepG2 hepatoblastoma cells (from  
507 Dr. Nirupma Trehanpati's Laboratory, Institute of Liver & Biliary Sciences ILBS, New  
508 Delhi, India), HepG2215, HBV stably expressing hepatoblastoma cells (from Dr. Senthil  
509 Kumar Venugopal's Lab, South Asian University, New Delhi, India) and HFFs (from

510 Professor. Wade Gibson's Lab, Johns Hopkins, School of Medicine) were cultured in  
511 Dulbecco's modified Eagle's medium (DMEM) supplemented with 10% fetal bovine serum  
512 (FBS) and 1% Antibiotic-Antimycotic solution. HepG2-NTCP cells were infected with HBV  
513 in Professor Akinori Takaoka's Laoboratoy as per the standard protocol. Human PBMCs  
514 were isolated from whole blood and NDV LaSota viral stocks were accumulated as described  
515 previously<sup>7</sup>. NDV-GFP was a kind gift from Professor Peter Palese, Icahn School of  
516 Medicine at Mount Sinai. Sendai-RFP (SeV-RFP) were borrowed from Dr. Sunil Raghav,  
517 ILS, Bhubaneswar, India, A single virus stock was used for all experiments. The cells were  
518 infected in serum-free DMEM with the NDV and SeV viruses at the MOIs indicated in the  
519 figure legends. After 60 min, the cells were washed with phosphate-buffered saline (PBS)  
520 and then were resuspended in DMEM, 1% FBS. HFFs were grown to full confluence and  
521 infected with GFP tagged HCMV at the MOIs indicated in the figure legends. HBV-positive  
522 sera were used to infect HepG2 cells as previously described<sup>42-46</sup>. HepG2 cells were made  
523 permissive to HBV virus infection by adding 3% PEG (polyethylglycol) and 0.5% DMSO  
524 (dimethylsulphoxide). The cells were infected in 1% FBS containing DMEM, 3% PEG and  
525 0.5% DMSO with the HBV-positive sera. After 6-7 hours, the cells were washed with  
526 phosphate-buffered saline (PBS) and then were resuspended in DMEM, 10% FBS, 3% PEG  
527 and 0.5% DMSO. For electroporation of human PBMCs,  $1 \times 10^6$  cells were suspended in  
528 Opti-MEM (Invitrogen) containing 50 nM mirVana miRNA mimics (Ambion). The cells  
529 were pulsed twice with 1000 V for 0.5 ms with a pulse interval of 5 s with the Gene Pulser  
530 Xcell electroporation system. The cells were then transferred to RPMI supplemented with  
531 10% FBS<sup>7</sup>. Transfection of cells with miRNA mimics, inhibitors and control  
532 mimics/inhibitors and/or plasmids was performed with Lipofectamine 2000 or 3000



533 (Invitrogen) according to the manufacturer's protocol. Poly IC (Invivogen) was mixed with  
534 Lipofectamine2000 before being used to transfect cells. ssRNA (Invitrogen) were used to  
535 stimulate the cells as mentioned in the figure legends. DMEM, FBS, Opti-MEM, RPMI, and  
536 Lipofectamine 2000/3000 were purchased from Invitrogen. The miR-30e mimic (miR-30e)  
537 (Invitrogen) or a nonspecific miRNA negative control (miR-NC1) was used according to the  
538 manufacturer's instructions (Applied Biosystems). The miR-30e inhibitor (AmiR-30e)  
539 (Invitrogen) was used to inhibit miR-30e expression in transfected cells. The cDNA encoding  
540 the 3'-UTR of negative regulators was retrieved from the UCSC gene sorter and was sub-  
541 cloned into the pMIR-REPORT luciferase vector. A total of 2.0 kb of sequence upstream of  
542 the miR-30e gene was retrieved from the UCSC genome browser. This sequence was  
543 amplified by PCR from genomic DNA and was subcloned into the pGL3 basic vector  
544 between the KpnI and HindIII sites. Plasmids containing Firefly Luciferase gene under *IFN $\beta$* ,  
545 *ISRE* and *NF $\kappa$ B* promoters, were obtained from Professor Shizuo Akira's (Osaka University,  
546 Japan), *rhIFN $\beta$*  (bei resources) and *rhTNF $\alpha$*  (R&D Systems). All sh- clones, were obtained  
547 from the whole RNAi human library for shRNA mediating silencing (Sigma, Aldrich)  
548 maintained at IISER, Bhopal, India. *In-silico* analysis for miRNA target gene prediction was  
549 done as previously described<sup>7</sup>.

550 **Quantitative real-time reverse transcription PCR.** Total RNA was extracted with the  
551 Trizol reagent (Ambion/Invitrogen) and used to synthesize cDNA with the iScript cDNA  
552 Synthesis Kit (BioRad, Hercules, CA, USA) according to the manufacturer's protocol. Gene  
553 expression was measured by quantitative real-time PCR using gene-specific primers and  
554 SYBR Green (Biorad, Hercules, CA, USA). For quantification of the abundances of miR-  
555 30e, real-time PCR analysis was performed with the TaqMan Universal PCR Master Mix

556 (Applied Biosystems) and the miR-30e-5p specific TaqMan miRNA assays. The Taqman  
557 U6 assay was used as a reference control. Real time quantification was done using StepOne  
558 Plus Real time PCR Systems by Applied BioSystems (Foster City, CA, USA). Primers used  
559 for qRT-PCR were listed in Supplementary Table T7.

560 **Luciferase Reporter assays.** HEK 293T and HeLa cells ( $5 \times 10^4$ ) were seeded into a 24-  
561 well plate and transiently transfected with 25 nM of mimics, 50 ng of the transfection control  
562 pRL-TK plasmid (*Renilla* luciferase containing plasmid) and 200 ng of the luciferase  
563 reporter plasmid (*Firefly* luciferase containing plasmid) together with/without 300 ng of the  
564 various expression plasmids or an empty plasmid as a control according to the respective  
565 experiments. The cells were lysed at 24 to 36 hours after transfection and/or infection or  
566 stimulations, and finally the luciferase activity in total cell lysates was measured with  
567 Glomax (Promega, Madison, WI, USA).

568 **Enzyme-linked immunosorbent assay (ELISA).** A549 and HeLa cells were transiently  
569 transfected with miR-30e and miR-NC1 and then were infected NDV virus. The culture  
570 media were harvested 36 to 40 hours after infection and were analyzed by specific ELISA  
571 kits (Becton Dickinson) according to the manufacturer's instructions to determine the  
572 amounts of *IP10* and *IL6* that were secreted by the cells.

573 **RNA immunoprecipitations.** RNA immunoprecipitations were performed as described  
574 previously<sup>47,48</sup>. The pIRESneo-Flag/HA Ago2 plasmid was a gift from Professor T. Tuschl  
575 (Addgene plasmid #10822). Briefly, HEK 293T cells transfected with miRNA and infected  
576 with NDV were lysed in 0.5% NP-40, 150 mM KCl, 25 mM tris-glycine (pH 7.5) and  
577 incubated with M2 Flag affinity beads (Sigma) overnight. The lysate was then washed with  
578 300 mM NaCl, 50 mM tris-glycine (pH 7.5), 5 mM MgCl<sub>2</sub>, and 0.05% NP-40. The extraction

579 of RNA from the immunoprecipitated RNPs was performed with the Trizol reagent (Ambion,  
580 Invitrogen) according to the manufacturer's protocol.

581 **Fluorescence-activated cell sorting (FACS) Cytometry Analysis.** A549 and HeLa cells  
582 were grown to 70-80% confluence, then treated with mimics and negative control reagents  
583 and finally infected with SeV-RFP and NDV-GFP. After 24 hours of infection, cells were  
584 trypsinized, harvested and then washed with PBS thrice and finally resuspended in PBS for  
585 FACS analysis as described in figure legends. Human PBMCs were treated with DNA and  
586 or camptothecin (0.3 $\mu$ M) to estimate apoptosis levels. At desired time points, cells were  
587 analyzed by staining with FITC-labeled Annexin V and propidium iodide (Becton  
588 Dickinson, USA) as per manufacturer's instructions and stained cells were analyzed using a  
589 FACS Aria III (Becton Dickinson) and data were analyzed by using FlowJo software  
590 (FlowJo, Ashland, OR, USA).

591 **Immunoblotting analysis.** After cells were transfected with miRNA mimic and controls  
592 then after infected with NDV and/or NDV-GFP (as indicated in figures), lysates were  
593 collected and subjected to western blotting analysis as previously described<sup>7,49</sup>. Cells were  
594 harvested after 36 hours of infection with standard ice-cold cell lysis buffer supplemented  
595 with 1 X protease inhibitor cocktail (obtained from Sigma, Aldrich). Immunoblotting were  
596 done as previously described<sup>49</sup>. Immunoblotted nitrocellulose membrane was imaged with  
597 LI-COR system. Anti-GFP antibody was obtained from Sigma-Aldrich, anti-TRIM38 (from  
598 ImmunoTag), anti-TANK, SOCS3, BECN1 (from Cloud-Clone Corporation), anti-ATG12  
599 (from Cell Signaling Technology), anti-SOCS1 (from Santa Cruz) and anti  $\gamma$ -Tubulin (from  
600 Sigma, Aldrich). IR dye labeled anti-Rabbit and anti-Mouse IgG (secondary antibody), were  
601 purchased from LI-COR.

602 **Microscopy.** HeLa cells were transfected with miRNA mimic and infected with NDV-GFP  
603 were fixed with 4% PFA for 15 min at room temperature; permeabilized with 0.05% Triton  
604 X-100 in 1 x PBS for 10 min at room temperature; blocked with bovine serum albumin (5  
605 mg/ml) in PBS, 0.04% Tween 20 for 30 min and incubated for 1 hour with the relevant  
606 primary antibodies diluted in blocking buffer. The cells were then washed three times with  
607 PBS and incubated for 1 hour with the appropriate secondary antibodies at room temperature.  
608 Nuclei were stained with DAPI, and the cells were then analyzed with an LSM 780 confocal  
609 laser microscope (Carl Zeiss). The images were analyzed using ImageJ processing software.  
610 HCMV infection (GFP fluorescence) in HFFs miRNA mimic and control mimic transfected  
611 cells was visualized with Inverted microscope Vert.A1 (AXIO) by Zeiss.

612 **RNA-Sequencing data analysis.** Trizol reagent (Ambion, Invitrogen) was used to isolate  
613 total RNA that was processed to prepare cDNA libraries using TruSeq technology according  
614 to the manufacturer's instructions protocol (Illumina, San Diego, CA). Libraries were  
615 sequenced using Illumina NovaSeq 6000, with a read length of 101 bp, by Bencos Research  
616 Solutions Pvt. Ltd., Bangalore, India. FastQC (0.11.5) was used to access the read quality of  
617 the raw data. Trimmomatic was used to remove Illumina adaptors and sliding-window  
618 approach was used for the quality filtering of reads. Approximately 20 million cleaned pair-  
619 end sequencing reads from each sample were uploaded to the Galaxy web platform and were  
620 analyzed at <https://usegalaxy.org>. HISAT2 was used to map the reads with the reference  
621 human genome (hg38). StringTie was used to assemble the aligned RNA-Seq reads into  
622 transcripts and estimate the abundance of the assembled transcripts. DESeq2 was used for  
623 differential expression analysis of genes between groups<sup>30</sup>. Various R packages were used to  
624 visualize the expression and differential expression outcomes. Gene ontology (GO) analysis

625 was done using the web-based Gene Set Analysis toolkit, and analysis of upregulated KEGG  
626 pathways was done using Enrichr. Cluster 3.0 and TreeView 1.1.6 were used for making heat  
627 maps. All the addressed analysis were demonstrated as described previously<sup>50</sup>.

628 **Statistical analysis.** All experiments were carried out along with the appropriate controls,  
629 indicated as untreated/untransfected cells (Ctrl) or transfected with the transfection reagent  
630 alone (Mock). Experiments were performed in duplicates or triplicates for at least two or  
631 three times independently. GraphPad Prism 5.0 (GraphPad Software, La Jolla, CA, USA)  
632 was used for statistical analysis. The differences between two groups were compared by  
633 using an unpaired two-tailed Student's t-test and/or Mann Whitney test additionally the  
634 paired data was analyzed using paired t-test and/or Wilcoxon sign rank test. While the  
635 differences between three groups or more were compared by using analysis of variance  
636 (ANOVA) with Tukey test. Differences were considered to be statistically significant when  
637  $P < 0.05$ . Statistical significance in the figures is indicated as follows: \*\*\* $P < 0.001$ , \*\* $P <$   
638  $0.01$ , \* $P < 0.05$ ; *ns*, not significant.

639

640

641

642

643

644

645

646

647

648

649

650

## References

651

652

653

654

655

656

657

658

659

660

661

662

663

664

665

666

667

668

669

670

671

672

673

674

675

676

677

678

679

680

681

682

683

684

685

686

687

688

689

690

691

692

693

694

695

696

1. Akira, S., Uematsu, S. & Takeuchi, O. Pathogen recognition and innate immunity. *Cell* 124, 783-801 (2006).
2. Alvarez, K. & Vasquez, G. Damage-associated molecular patterns and their role as initiators of inflammatory and auto-immune signals in systemic lupus erythematosus. *International reviews of immunology* 36, 259-270 (2017).
3. He, L. & Hannon, G.J. MicroRNAs: small RNAs with a big role in gene regulation. *Nature reviews. Genetics* 5, 522-531 (2004).
4. Treiber, T., Treiber, N. & Meister, G. Regulation of microRNA biogenesis and its crosstalk with other cellular pathways. *Nature reviews. Molecular cell biology* 20, 5-20 (2019).
5. Li, C. *et al.* Competitive virus and host RNAs: the interplay of a hidden virus and host interaction. *Protein & cell* 5, 348-356 (2014).
6. Zheng, Z. *et al.* Human microRNA hsa-miR-296-5p suppresses enterovirus 71 replication by targeting the viral genome. *Journal of virology* 87, 5645-5656 (2013).
7. Ingle, H. *et al.* The microRNA miR-485 targets host and influenza virus transcripts to regulate antiviral immunity and restrict viral replication. *Science signaling* 8, ra126 (2015).
8. Porritt, R.A. & Hertzog, P.J. Dynamic control of type I IFN signalling by an integrated network of negative regulators. *Trends in immunology* 36, 150-160 (2015).
9. Kondo, T., Kawai, T. & Akira, S. Dissecting negative regulation of Toll-like receptor signaling. *Trends in immunology* 33, 449-458 (2012).
10. Moulton, V.R. *et al.* Pathogenesis of Human Systemic Lupus Erythematosus: A Cellular Perspective. *Trends in molecular medicine* 23, 615-635 (2017).
11. Shen, N., Liang, D., Tang, Y., de Vries, N. & Tak, P.P. MicroRNAs--novel regulators of systemic lupus erythematosus pathogenesis. *Nature reviews. Rheumatology* 8, 701-709 (2012).
12. Garchow, B.G. *et al.* Silencing of microRNA-21 in vivo ameliorates autoimmune splenomegaly in lupus mice. *EMBO molecular medicine* 3, 605-615 (2011).
13. Ning, Z.Q. *et al.* MicroRNA-30e reduces cell growth and enhances drug sensitivity to gefitinib in lung carcinoma. *Oncotarget* 8, 4572-4581 (2017).
14. Feng, G.X. *et al.* Hepatitis B virus X protein promotes the development of liver fibrosis and hepatoma through downregulation of miR-30e targeting P4HA2 mRNA. *Oncogene* 36, 6895-6905 (2017).
15. Liu, M.M. *et al.* MiR-30e inhibits tumor growth and chemoresistance via targeting IRS1 in Breast Cancer. *Scientific reports* 7, 15929 (2017).
16. Su, Q., Ye, Z., Sun, Y., Yang, H. & Li, L. Relationship between circulating miRNA-30e and no-reflow phenomenon in STEMI patients undergoing primary coronary intervention. *Scandinavian journal of clinical and laboratory investigation* 78, 318-324 (2018).
17. Wu, J. *et al.* MicroRNA-30 family members regulate calcium/calcineurin signaling in podocytes. *The Journal of clinical investigation* 125, 4091-4106 (2015).
18. Kim, B.S., Jung, J.Y., Jeon, J.Y., Kim, H.A. & Suh, C.H. Circulating hsa-miR-30e-5p, hsa-miR-92a-3p, and hsa-miR-223-3p may be novel biomarkers in systemic lupus erythematosus. *Hla* 88, 187-193 (2016).
19. Kozak, R.A. *et al.* MicroRNA and mRNA Dysregulation in Astrocytes Infected with Zika Virus. *Viruses* 9 (2017).
20. Zhu, X. *et al.* MicroRNA-30e\* suppresses dengue virus replication by promoting NF-kappaB-dependent IFN production. *PLoS neglected tropical diseases* 8, e3088 (2014).

- 697 21. Versteeg, G.A., Benke, S., Garcia-Sastre, A. & Rajsbaum, R. InTRIMsic immunity: Positive  
698 and negative regulation of immune signaling by tripartite motif proteins. *Cytokine & growth*  
699 *factor reviews* 25, 563-576 (2014).
- 700 22. Zhao, W., Wang, L., Zhang, M., Yuan, C. & Gao, C. E3 ubiquitin ligase tripartite motif 38  
701 negatively regulates TLR-mediated immune responses by proteasomal degradation of TNF  
702 receptor-associated factor 6 in macrophages. *J Immunol* 188, 2567-2574 (2012).
- 703 23. Hu, M.M. *et al.* TRIM38 inhibits TNF $\alpha$ - and IL-1 $\beta$ -triggered NF- $\kappa$ B activation  
704 by mediating lysosome-dependent degradation of TAB2/3. *Proceedings of the National*  
705 *Academy of Sciences of the United States of America* 111, 1509-1514 (2014).
- 706 24. Kawagoe, T. *et al.* TANK is a negative regulator of Toll-like receptor signaling and is critical  
707 for the prevention of autoimmune nephritis. *Nature immunology* 10, 965-972 (2009).
- 708 25. Li, M. *et al.* Respiratory Syncytial Virus Replication Is Promoted by Autophagy-Mediated  
709 Inhibition of Apoptosis. *Journal of virology* 92 (2018).
- 710 26. Jounai, N. *et al.* The Atg5 Atg12 conjugate associates with innate antiviral immune  
711 responses. *Proceedings of the National Academy of Sciences of the United States of America*  
712 104, 14050-14055 (2007).
- 713 27. Cui, J., Jin, S. & Wang, R.F. The BECN1-USP19 axis plays a role in the crosstalk between  
714 autophagy and antiviral immune responses. *Autophagy* 12, 1210-1211 (2016).
- 715 28. Pothlichet, J., Chignard, M. & Si-Tahar, M. Cutting edge: innate immune response triggered  
716 by influenza A virus is negatively regulated by SOCS1 and SOCS3 through a RIG-  
717 I/IFNAR1-dependent pathway. *J Immunol* 180, 2034-2038 (2008).
- 718 29. Gheita, T.A. *et al.* Anti-dsDNA titre in female systemic lupus erythematosus patients:  
719 relation to disease manifestations, damage and antiphospholipid antibodies. *Lupus* 27, 1081-  
720 1087 (2018).
- 721 30. Love, M.I., Huber, W. & Anders, S. Moderated estimation of fold change and dispersion  
722 for RNA-seq data with DESeq2. *Genome Biology*, 15, 550 (2014).
- 723 31. Morel, L. Genetics of SLE: evidence from mouse models. *Nature reviews. Rheumatology* 6,  
724 348-357 (2010).
- 725 32. Vela, E.M. *et al.* MicroRNA expression in mice infected with seasonal H1N1, swine H1N1  
726 or highly pathogenic H5N1. *Journal of medical microbiology* 63, 1131-1142 (2014).
- 727 33. Gao, L. *et al.* Dynamic expression of viral and cellular microRNAs in infectious  
728 mononucleosis caused by primary Epstein-Barr virus infection in children. *Virology journal*  
729 12, 208 (2015).
- 730 34. Wang, Y. *et al.* Elevated expression of miR-142-3p is related to the pro-inflammatory  
731 function of monocyte-derived dendritic cells in SLE. *Arthritis research & therapy* 18, 263  
732 (2016).
- 733 35. Chaussabel, D. *et al.* A modular analysis framework for blood genomics studies: application  
734 to systemic lupus erythematosus. *Immunity* 29, 150-164 (2008).
- 735 36. Yang, Y. *et al.* Pretreatment microRNA levels can predict HBsAg clearance in CHB patients  
736 treated with pegylated interferon alpha-2a. *Virology journal* 15, 73 (2018).
- 737 37. Wang, Y. *et al.* TRIM35 negatively regulates TLR7- and TLR9-mediated type I interferon  
738 production by targeting IRF7. *FEBS letters* 589, 1322-1330 (2015).
- 739 38. Narayan, K. *et al.* TRIM13 is a negative regulator of MDA5-mediated type I interferon  
740 production. *Journal of virology* 88, 10748-10757 (2014).
- 741 39. Lu, Q. *et al.* Homeostatic Control of Innate Lung Inflammation by Vici Syndrome Gene  
742 Epg5 and Additional Autophagy Genes Promotes Influenza Pathogenesis. *Cell host &*  
743 *microbe* 19, 102-113 (2016).
- 744 40. Aliberti, J. *et al.* Essential role for ICSBP in the in vivo development of murine CD8 $\alpha^+$  dendritic  
745 cells. *Blood* 101, 305-310 (2003).
- 746 41. Tamura, T. *et al.* IFN Regulatory Factor-4 and -8 Govern Dendritic Cell Subset Development and  
747 Their Functional Diversity. *Journal of Immunology* 175 (5), 2573-2581 (2005).

- 748 42. Paran, N., Geiger, B. & Shaul, Y. HBV infection of cell culture: evidence for multivalent  
749 and cooperative attachment. *The EMBO journal* 20, 4443-4453 (2001).
- 750 43. Bchini, R., Capel, F., Daguuet, C., Dubanchet, S. & Petit, M.A. In vitro infection of human  
751 hepatoma (HepG2) cells with hepatitis B virus. *Journal of virology* 64, 3025-3032 (1990).
- 752 44. Gripon, P. *et al.* Hepatitis B virus infection of adult human hepatocytes cultured in the  
753 presence of dimethyl sulfoxide. *Journal of virology* 62, 4136-4143 (1988).
- 754 45. Vivekanandan, P., Daniel, H.D., Kannangai, R., Martinez-Murillo, F. & Torbenson, M.  
755 Hepatitis B virus replication induces methylation of both host and viral DNA. *Journal of*  
756 *virology* 84, 4321-4329 (2010).
- 757 46. Zhu, X. *et al.* TMEM2 inhibits hepatitis B virus infection in HepG2 and HepG2.2.15 cells  
758 by activating the JAK-STAT signaling pathway. *Cell death & disease* 7, e2239 (2016).
- 759 47. Meister, G. *et al.* Human Argonaute2 mediates RNA cleavage targeted by miRNAs and  
760 siRNAs. *Molecular cell* 15, 185-197 (2004).
- 761 48. Beitzinger, M. & Meister, G. Experimental identification of microRNA targets by  
762 immunoprecipitation of Argonaute protein complexes. *Methods Mol Biol* 732, 153-167  
763 (2011).
- 764 49. Kumar, S. *et al.* IPS-1 differentially induces TRAIL, BCL2, BIRC3 and PRKCE in type I  
765 interferons-dependent and -independent anticancer activity. *Cell death & disease* 6, e1758  
766 (2015).
- 767 50. Kumar, A. *et al.* MicroRNA hsa-miR-324-5p Suppresses H5N1 Virus Replication by  
768 Targeting the Viral PB1 and Host CUEDC2. *Journal of virology* 92 (2018).

770

771

772

773

774

775

776

777

778

779

780

781

782

783

784

785



786

787 **Figure Legends**

788 **Figure 1 - Viral infection induces miRNA-30e that inhibits virus replication by promoting innate**

789 **immunity:** (A) Quantification (as determined by qRT-PCR analysis) of the fold changes in the abundances of

790 miR-30e as indicated, in the serum collected from hepatitis B patients (n=51) compared to healthy controls

791 (n=24). (B-F; I and J) Quantification of the fold changes in the relative abundances of miR-30e , viral transcripts

792 and respective innate immune transcripts (*IFN $\lambda$ 1*, *IL6* and *IFIT1*) at the indicated times after treatment or

793 infection with (B) HBV patient's serum (HBV PS) in HepG2 cells, (C) HepG2 cells were transfected with miR-

794 30e (50 nM) or miR-NC1 (50 nM) prior to infection (D) HepG2215 cells, stably expressing HBV replicon

795 HepG2 cells transfected with miR-30e or miR-NC1, (E) NDV (MOI 5) in human PBMCs, (F) hPBMCs

796 transfected with miR-30e or AmiR-30e (50 nM) prior to infection and (I) SeV (MOI 5) in A549 cells (J) A549

797 cells transfected with miR-30e or AmiR-30e prior to infection. (G, H and K) Quantification of viral infection

798 as indicated in (G) HEK293 cells (transfected with miR-30e or AmiR-30e for 24 hours then infected with GFP-

799 tagged NDV (NDV-GFP) (MOI 5) for 36 hours and subjected to immunoblot analysis using antibodies specific

800 for GFP (anti-GFP antibody) and  $\gamma$ -tubulin (used as a loading control), (H) HeLa cells transfected with miR-

801 30e or infected with NDV-GFP and subsequently subjected to confocal microscopic analysis for NDV particles

802 with anti-GFP antibody (green) and, nuclei were visualized with 4',6-diamidino-2-phenylindole (DAPI; blue)

803 and (K) A549 cells were transfected with miR-30e or AmiR-30e for 24 hours then infected with RFP tagged

804 SeV (MOI 5) for 24 hours and analyzed by flow cytometry. Ctrl represents control untreated sample, D;

805 represents number of days, *dpi*; represents days post infection and *hpi*; represents hours post infection. Data are

806 mean +/- SEM of triplicate samples from single experiment and are representative of three (A-C, E, F, I, J) two

807 (D, G, H, K) independent experiments. \*\*\* $P$ <0.001, \*\* $P$ <0.01 and \* $P$ <0.05 by one-way ANOVA Tukey test,

808 Mann-Whitney test and unpaired t-test.

809 **Figure 2 - Transcriptomic analysis shows miR-30e enhances innate immune responses during NDV**

810 **infection:** (A) Schematic outline of transfection with control (miR-NC1) or miR-30e and NDV infection (MOI

811 5) in A549 cells at indicated time and subjected to whole transcriptome sequencing and gene analysis (Inf:

812 infected and Un-inf: uninfected). (B) Quantification of the fold changes in the abundances of miR-30e is

813 measured by qRT-PCR and normalized by U6 control and NDV viral transcripts in both the replicate samples

814 used for transcriptome sequencing and analysis. (C) Plot showing first two components from principal  
815 component analysis of all the 6 samples, distance between samples indicate how different they are from each  
816 other in terms of gene expression. (D) Volcano plot represents differential expression of genes between two  
817 groups of samples (miR-30e and miR-NC1 overexpression) during NDV infection in A549 cells. For each  
818 gene: *P-value* is plotted against fold change (miR-30e vs miR-NC1). Genes significantly changed (>1.5-fold)  
819 are colored in red (upregulated) and blue (downregulated). (E) KEGG pathway analysis of upregulated genes,  
820 outer circle indicates top upregulated pathways and the inner circle represents corresponding combined score  
821 (a derivative of *P-value* and *Z-score*). (F) Heat map represents relative abundance of top upregulated interferon  
822 stimulated genes across different samples. (G) Quantification (measured by qRT-PCR) of the fold changes in  
823 the abundances of type 1 interferon and pro-inflammatory cytokines in the samples, A549 cells transfected with  
824 miR-NC1 or miR-30e and infected with NDV as indicated (NDV+NC1) and (NDV+30e), analyzed by RNA-  
825 Sequencing.

826 **Figure 3 - miR-30e targets 3'UTR of negative regulators of innate immune signaling pathways:** (A)  
827 Screening pipeline used for identification of miR-30e target genes based on the indicated schematic workflow,  
828 final hits 09 genes corresponds to negative regulators targeted by miRNA-30e. (B) Reanalysis of previous  
829 transcriptome data for identification of negative regulators (targeted by miR-30e) upon miR-30e transfection  
830 and NDV infection (MOI 5) compared to miR-NC1 in two replicate samples. (C) HEK293 cells were  
831 transfected with 50 ng of pRL-TK and 300ng of 3'UTR\_WT (of indicated genes) together with 25 nM miR-  
832 30e or miR-NC1, 24 hours after transfection, the cell was lysed and subjected to luciferase assay. (D) HEK293T  
833 cells were transiently transfected with 1.5µg of *sh*-clones of indicated genes or scrambled control for 48 hours  
834 then infected with NDV (MOI 5) for 24 hours and subjected to the quantification of the indicated transcripts or  
835 genes and *IFNβ*. (E) Schematic for RNA-immunoprecipitation assay. HEK293 cells were transfected with  
836 plasmid encoding Flag-Ago2 in presence of miR-30e (50 nM) and miR-NC1 (50 nM) and then infected with  
837 NDV (MOI 5). 24 hours after transfection cells were subjected to RNA immunoprecipitation with ant-Flag  
838 antibody and quantified for *TRIM38*, *TANK*, *ATG5*, *ATG12*, *BECN1*, *SOCS1* and *SOCS3* transcripts. (F) A549  
839 cells were transfected with miR-30e or miR-NC1 mimic and then infected with NDV (MOI 5) for 36 hours  
840 before being subjected to immunoblot analysis with antibodies specific for indicated protein or  $\gamma$ -tubulin (used  
841 as a loading control). Data are mean +/- SEM of triplicate samples from single experiment and are

842 representative of three (C) two (D, E, F) independent experiments. \*\*\* $P < 0.001$ , \*\* $P < 0.01$  and \* $P < 0.05$  by  
843 one-way ANOVA Tukey test and unpaired t-test.

844

845 **Figure 4 - Human PBMCs stimulated with DAMPs induce miRNA-30e and enhance innate immune**  
846 **responses:** PBMCs from three healthy individuals were transfected with their own genomic DNA (ds DNA).  
847 (A) Isolated genomic DNA sonicated into small fragments of dsDNA of approximately 100-150 bps each (as  
848 shown) and transfected using Lipofectamine 2000. (B-F) Quantification (by qRT-PCR analysis) of the fold  
849 changes in the relative abundances of (B) miR-30e, (C-E) respective innate immune transcripts (*IFN $\alpha$* , *IFN $\beta$* ,  
850 *IFIT1* and *IL6*) in all individuals and (F) NDV viral transcript (shown as per schematic workflow). Data are  
851 mean +/- SEM of triplicate samples from single experiment and are representative of three independent  
852 experiments in three different individuals. \*\*\* $P < 0.001$ , \*\* $P < 0.01$  and \* $P < 0.05$  by one-way ANOVA Tukey  
853 test and unpaired t-test, N.D. correspond to not detected.

854

855 **Figure 5 - SLE patients and mouse model show enhanced innate immune responses:** (A-C) Quantification  
856 of the fold changes by qRT-PCR analysis of indicated transcripts *IFN $\beta$* , *IFIT1* and *IL6* (in SLE patients) and  
857 *Irf10*, *Tnf $\alpha$*  and *Il6* (in SLE mice) and miR-30e at indicated times as represented in the schematic workflow in,  
858 (A) PBMCs from SLE diagnosed patients (P) (n=13) and healthy controls (HC) (n=13), (B) Splenocytes from  
859 parent (New Zealand White and Black-NZW and NZB) (PM) (n=7) and lupus induced mice (NZW/B -F1  
860 progeny) (F1) (n=7) and (C) Splenocytes from PM (n= 9) and F1 (n=12) and serum from PM (n=16) and F1  
861 (n=21). Data are mean +/- SEM of triplicate samples from single experiment (A) and are representative of two  
862 independent experiments (B and C). \*\*\* $P < 0.001$ , \*\* $P < 0.01$  and \* $P < 0.05$  by unpaired t-test and Mann-  
863 Whitney test.

864

865 **Figure 6 - Enhanced miRNA-30e suppresses negative regulators in SLE patients and mouse model:** (A-  
866 B) Schematic representation of the workflow for quantification of the fold changes by qRT-PCR analysis of  
867 indicated transcripts in (A) PBMCs of SLE patients (*TRIM38*, *TANK*, *SOCS1* and *SOCS3*) and (B) Splenocytes  
868 of SLE mice (*Socs1*, *Socs3*, *Atg5* and *Atg12*). Data are mean +/- SEM of triplicate samples from single

869 experiment (A) and are representative of two independent experiments (B). \*\*\* $P < 0.001$ , \*\* $P < 0.01$  and  
870 \* $P < 0.05$  by unpaired t-test.

871 **Figure 7 - Prognostic and therapeutic potential of miR-30e:** (A) Schematic representation of the workflow  
872 for quantification of the fold changes by qRT-PCR analysis of miR-30e as indicated, in the serum collected  
873 from hepatitis B (HBV) naive patients (n=7) compared to HBV treated (with pegylated IFNs) patients (n=7).  
874 (B) Schematic representation of workflow for quantification of the fold changes in the relative abundances of  
875 miR-30e and *IFN $\beta$*  as indicated, in the PBMCs from SLE patients treated with/without AmiR-30e (miR-30e  
876 inhibitor). (C) Schematic representation of the *ex-vivo* experiment workflow for quantification of the fold  
877 changes in the relative abundances of *Il6* and *Tnfa* as indicated, in the splenocytes from SLE mice model (as  
878 described previously) treated with AmiR-30e (miR-30e inhibitor) and AmiR-NC1. (D) Schematic  
879 representation of the *in-vivo* experiment workflow for quantification of the fold changes of miR-30e, *Il6*, *Ip10*,  
880 *Socs1* and *Socs3* as indicated, in the splenocytes and serum from SLE mice model (as described previously);  
881 four mice distributed in each group were subjected to LNA-miR-30e-antagomir (LNA Amir-30e) and LNA-  
882 negative control antagomir (LNA NC) treatment (explained in materials and methods). Data are mean +/- SEM  
883 of triplicate samples from single experiment (A-B and D) and are representative of two independent  
884 experiments (C). All the *P-values*/\*\* $P < 0.001$  defined by paired t-test.

885 **Figure 8 – Regulation of innate immune responses by miRNA-30e during virus infection and SLE:**  
886 PAMPs (green) and DAMPs (red) sensed by Pattern recognition receptors (PRRs) to activate cascade of innate  
887 immune signaling pathways to induce pro-inflammatory cytokines (yellow), type I and type III interferons  
888 (blue) and miRNA-30e (purple). miRNA-30e regulates both PAMPs and DAMPs induced immune responses  
889 by targeting the 3'-UTR of negative regulators (dark blue) of innate immune signaling pathways and reducing  
890 the expression of these negative regulators (grey). During viral infection, miR-30e is induced which reduces  
891 the cellular abundance of negative regulators to enhance innate immune responses and facilitate viral clearance.  
892 The endogenous host DNA induces miR-30e and subsequently enhances innate immune responses for the  
893 development of autoimmune disease, SLE.

894

895 **Supplementary Figure Legends**

896 **Figure S1 - miRNA-30e induced during viral infection:** (A) Schematic representation for the selection and  
897 screening pipeline of common miRNAs during viral infections. (B) Table and Venn diagram represent miR-  
898 30e, miR-27a and miR-181a as commonly upregulated miRNAs during indicated infections. Abundance of  
899 miR-30e-5p as log fold change (Log FC) and transcripts per million (TPM) in indicated infections, (C) Log FC  
900 (fold change) of the selected miRNAs and efficiency (represented by [\*] asterisk) by which they target the  
901 negative regulation of innate immune signaling pathways as per indicated GEO dataset (GSE65694) and  
902 algorithms. (D) miR-30e is conserved among the wide range of species (green); has, Homo sapiens (Human);  
903 mmu, Mus musculus (Mouse); rno, Rattus norvegicus (Norway Rat); mml, Macaca mulatta (Rhesus monkey);  
904 gga, Gallus gallus (chicken); chi, Capra hircus (Goat); dre, Danio rerio (Zebrafish) and bta, Bos Taurus (Cattle).

905 **Figure S2 - Induction of miRNA-30e in different cells by DNA, RNA virus and viral PAMPs:** (A-E)  
906 Quantification of the fold changes by qRT-PCR in the abundances of miR-30e (at the indicated times and cells)  
907 after indicated viral infections and viral PAMPs treatment (A and B) NDV (MOI 5) in A549 and Raw 264.7  
908 cells respectively, (C) HCMV-GFP (MOI 5) in HFF. (D and E) indicated synthetic PAMPs [poly IC (10µg/ml)  
909 {stimulation (S) and transfection (T)}; ssRNA (2µg/ml)] in (D) HeLa and (E) Raw 264.7 cells. (F) Schematic  
910 representation of workflow for quantification of miR-30e promoter activity and ISRE/IFNβ/NFκB promoter  
911 activity by luciferase assay as indicated in (G, I-K) HEK293 cells and (H) HeLa cells. Data are mean +/- SEM  
912 of triplicate samples from single experiment and are representative of three (A-C, I-M) two (D-G) independent  
913 experiments. \*\*\* $P < 0.001$ , \*\* $P < 0.01$  and \* $P < 0.05$  by one-way ANOVA Tukey test and unpaired t-test.

914 **Figure S3 - miR-30e inhibits viral replication:** (A-F) Quantification of the fold changes in the relative  
915 abundances of viral transcripts measured by qRT-PCR after treatment or infection in indicated cells with (A)  
916 HepG2215 cells were transfected with/without miR-30e as described previously, (B) HepG2-NTCP cells  
917 transfected with miR-30e and miR-NC1 to quantify relative expression (RE) of HBV viral transcripts (HBV  
918 RNA and pgRNA), (C) HBV patient serum in HepG2 compared with HepG2215 cells as indicated. (D-F) NDV  
919 (MOI 5) in HeLa, A549 and Raw264.7 cells respectively transfected with miR-NC1 or miR-30e prior to  
920 infection as described previously. (G) Quantification of NDV viral signals detected by flow cytometry in HeLa  
921 cells mock transfected or transfected with miR-30e for 24 hours then subjected to NDV (GFP tagged) infection  
922 (MOI 5) for 24 hours. HBV DNA, HBV cccDNA and HBV copy number represent different primers set used

923 to measure HBV viral transcripts. Data are mean +/- SEM of triplicate samples from single experiment and are  
924 representative of three (D-F) two (A, B,C and G) independent experiments. \*\*\* $P < 0.001$  and \*\* $P < 0.01$  by one-  
925 way ANOVA Tukey test and unpaired t-test.

926 **Figure S4 - miR-30e enhances innate immune responses during viral infection (A-F)** Quantification of the  
927 fold changes in the relative abundances of indicated genes and cells measured by qRT-PCR after viral infection  
928 and transfection with/without miR-30e as described previously. (G-I) A549 and HeLa cells were mock  
929 transfected, transfected with miR-30e or miR-NC1 mimics and then infected with NDV (MOI 5), 24 hours after  
930 infection, the amounts of *IP10* and *IL6* protein secreted into the cell culture supernatant were measured by  
931 enzyme-linked immunosorbent assay (ELISA). (J-L) Schematic representation of workflow for quantification  
932 of ISRE/IFN $\beta$ /NF $\kappa$ B promoter activity by luciferase assay as indicated in (I-K) HEK293 cells. Data are mean  
933 +/- SEM of triplicate samples from single experiment and are representative of two (A-B) and three (C-L)  
934 independent experiments. \*\*\* $P < 0.001$ , \*\* $P < 0.01$  and \* $P < 0.05$  by one-way ANOVA Tukey test.

935 **Figure S5 - miR-30e inhibits DNA virus replication:** HFF (Human foreskin fibroblast) cells were cultured  
936 in DMEM and transfected with miR-30e or miR-NC1 mimics then infected with HCMV-GFP virus (MOI = 5)  
937 and RNA were isolated to quantify the (A) HCMV transcript (Glycoprotein B) by using qRT-PCR and GFP  
938 signals (of HCMV-GFP tagged virus) by microscopy, (B) *IL6* transcript in indicated transfected groups and  
939 compared with control. Data are mean +/- SEM of triplicate samples from single experiment and are  
940 representative of two independent experiments. \*\*\* $P < 0.001$  and \*\* $P < 0.01$  by one-way ANOVA Tukey test.

941 **Figure S6 - miR-30e enhances innate immune responses upon viral PAMPs stimulation:** (A-F)  
942 Quantification of indicated transcripts in indicated cells (measured by qRT-pCR) transfected with mir-30e or  
943 miR-NC1 for 24 hours and then stimulated with (A-D) poly IC (10 $\mu$ g/ml) and (E-F) ssRNA (2 $\mu$ g/ml) treatment  
944 respectively. (G, H) HEK 293T cells transfected with miR-30e (25 nM) or miR-NC1 (25 nM) mimics, pRL-  
945 TK (50 ng) and indicated luciferase reporters for ISRE/IFN $\beta$  (200 ng) then stimulated with poly IC for 24  
946 hours. Cells were then lysed to analyze the promoter activity by luciferase assay. Data are mean +/- SEM of  
947 triplicate samples from single experiment and are representative of three independent experiments.  
948 \*\*\* $P < 0.001$ , \*\* $P < 0.01$  and \* $P < 0.05$  by one-way ANOVA Tukey test.

949

950

951 **Figure S7 – miR-30e differentially expressed genes during NDV infection:** (A) Workflow for the analysis  
952 of RNA-Sequencing data from raw sequencing reads to expression profiles of differentially expressed genes  
953 represented through different plots and heat maps. (B) MA (M=log ratio and A=mean average) plot for  
954 differential expression of genes, indicating upregulated (in red) and downregulated (in green) genes. (C) Heat  
955 map representing relative abundance of genes involved in top enriched KEGG pathways in figure 2E.

956 **Figure S8 – Minimum free energy (mfe) for binding efficiency of miR-30e to negative regulators:**  
957 Representative of minimum free energy diagrams for negative regulators (*TRIM38*, *TRIM13*, *TANK*, *ATG5*,  
958 *ATG12*, *BECN1*, *EPG5*, *SOCS1* and *SOCS3*) and positive regulators (*JAK1* and *STAT1*) targeted by miR-30e.

959 **Figure S9 – Quantification of innate immune negative regulators in presence of miR-30e:** (A) HEK293  
960 cells were transfected with miR-30e (25nM) mimic and 50 ng of pRL-TK along with 300ng of 3'UTR\_WT or  
961 300ng of 3'UTR\_MUT for 24 hours, the cell was lysed and subjected to luciferase assay. 3'-UTRs of all  
962 selected target genes having binding sites for seed sequence in miR-30e were conserved throughout (shown in  
963 red). (B and C) Quantification of the fold changes by qRT-PCR analysis in the relative abundances of miR-30e  
964 (at the indicated times), and negative regulator transcripts (*TRIM38*, *TANK*, *ATG5*, *ATG12*, *BECN1*, *SOCS1*  
965 and *SOCS3*) after infection of (B) NDV (MOI = 5) in A549 cells and (C) NDV (MOI = 5) for 24 hours in A549  
966 cells remain untransfected, transfected with miR-30e or miR-NC1 as indicated. Data are mean +/- SEM of  
967 triplicate samples from single experiment and are representative of two independent experiments. \*\*\* $P < 0.001$ ,  
968 \*\* $P < 0.01$  and \* $P < 0.05$  by one-way ANOVA Tukey test.

969 **Figure S10 – Quantification of innate immune negative regulators in presence of miR-30e:** (A-D)  
970 Quantification of the fold changes by qRT-PCR analysis in the relative abundances of negative regulator  
971 transcripts (*TRIM38*, *TANK*, *ATG5*, *ATG12*, *BECN1*, *SOCS1* and *SOCS3*) in (A) HepG2 cells remain  
972 untransfected, transfected with miR-30e, AmiR-30e or miR-NC1 for 48 hours then treated with HBV-PS for  
973 HBV infection, (B) HepG2215 cells transfected as described previously, (C) HepG2-NTCP cells transfected  
974 with miR-30e and miR-NC1 for 48 hours then infected with HBV infection. (D-E) HeLa cells remain  
975 untransfected, transfected with miR-30e, AmiR-30e or miR-NC1 for 24 hours then (D) infected with NDV (MOI  
976 = 5) or (E) treated with poly IC for 24 hours. D; represents number of days, *dpi*; days post infection and *hpi*;  
977 hours post infection. Data are mean +/- SEM of triplicate samples from single experiment and are representative  
978 of two independent experiments. \*\*\* $P < 0.001$ , \*\* $P < 0.01$  and \* $P < 0.05$  by one-way ANOVA Tukey test.

979 **Figure S11 – DAMPs induce apoptosis and TLR 3/7/9:** (A) Human PBMCs remain untreated or treated with  
980 camptothecin, dsDNA separately from two different individuals (as indicated 1 and 2) and subjected to Annexin  
981 PI assay to detect the apoptosis level within the PBMCs using flow cytometry. (B-D) Quantification of the  
982 fold changes by qRT-PCR analysis in the relative abundances of respective transcripts (*TLR3*, *TLR7* and *TLR9*)  
983 in all individuals. Data is the representative of three independent experiments. Data are mean +/- SEM of  
984 triplicate samples from single experiment and are representative of three independent experiments. \*\*\* $P < 0.001$   
985 and \*\* $P < 0.01$  by unpaired t-test.

986 **Figure S12 – GEO Datasets re-analyzed to demonstrate the expression level of miR-30e in autoimmune**  
987 **disorder:** (A) SLE (GSE79240) - Non-coding RNA profiling by microarray in dendritic cells of SLE patients  
988 (P) compared to healthy controls (HC). Data points include fold change of miR-30e among 5 patients. (B) Type  
989 1 Diabetes Mellitus (GSE55099) - Non-coding RNA profiling by microarray in PBMCs of patients (P)  
990 compared to healthy controls (HC). Data points include fold change of miR-30e among 12 patients compared  
991 to 10 healthy controls ( $P$ -value = 0.0086).

992 **Figure S13 – GEO Dataset-GSE11909 re-analyzed to demonstrate the transcript levels of innate negative**  
993 **regulators in SLE:** (A) Expression profiling by microarray to estimate the log fold change of following innate  
994 negative regulators during SLE pathogenesis in patients (P) compared to healthy controls (HC); ATG5, ATG12,  
995 BECN1, TANK, SOCS1, SOCS3, TRIM13 and TRIM38.

996 **Figure S14 – GEO Dataset-GSE104126 re-analyzed to demonstrate the expression level of miR-30e:** (A)  
997 Non-coding RNA profiling by microarray in PBMCs of two types of chronic hepatitis B (CHB) patients  
998 (HBsAg loss and non-HBsAg loss) after treatment with pegylated interferon (peg-IFN $\alpha$ 2a). Data points include  
999 fold change of miR-30e among 10 patients.

1000

1001



1002 **Supplementary Tables**

1003 Table T1: Demographic data of chronic hepatitis B (CHB) cohort and controls

1004 Table T2: Differentially expressed genes by RNA sequencing analysis

1005 Table T3: *In-silico* analysis of miR-30e targets using indicated algorithms

1006 Table T4: CLIP database analysis for miR-30e targets

1007 Table T5: SLE patients details used in the study

1008 Table T6: Demographic data of chronic hepatitis B (CHB) patients after Peg-interferon treatment

1009 Table T7: List of primers used in the study

1010

1011

1012

1013

1014

1015

1016

1017

1018

1019

1020

1021

1022

1023

1024

1025

1026

1027

1028 **Acknowledgments:** We acknowledge Professor Akinori Takaoka for valuable discussions.

1029 We thank Dr. Takaji Wakita for providing the HepG2-NTCP cell lines. We thank Dr.

1030 Nirupma Trehanpati and Dr. Senthil Kumar Venugopal for providing the HepG2 and

1031 HepG2215 cell lines. We thank Dr. Sunil Raghav for providing Sendai-RFP, Professor. Peter

1032 Palese for providing NDV-GFP and Professor. Wade Gibson for providing HCMV-GFP and

1033 HFFs. We thank Professor. T. Tuschl for providing the Ago2-Flag construct through

1034 Addgene and BEI Resources for providing human rIFN $\beta$ . We are grateful to Indian Institute

1035 of Science Education and Research (IISER) Bhopal for providing the Central

1036 Instrumentation Facility. We also thank all members of the laboratory for helpful

1037 discussions. Finally, we are eternally grateful to all the patients and healthy donors for

1038 proving their blood samples for the study.

1039

1040

1041

1042

1043

1044

1045

1046

1047

1048

1049

1050

1051

1052

1053

1054

1055

1056

1057

1058 **Funding:** This work was partially supported by IISER Bhopal–IGM Hokkaido University  
1059 Grant for General Joint Research Program of the Institute for Genetic Medicine, Hokkaido  
1060 University, Japan and by an Intramural Research Grant of IISER, Bhopal, India, to H.K.  
1061 Start-up grant, IISER Bhopal to A.C. R.M. is supported by the IISER Bhopal institutional  
1062 fellowship.

1063 **Author contributions:** R.M. and H.K. conceptualized the study and designed the  
1064 experiments; R.M. performed the experiments; S.B. and D.K. performed the mutation  
1065 experiments; R.M., A.K. and H.K. analyzed the data; R.M., P.G. and H.K. designed the HBV  
1066 experiments; P.G. provided the HBV patients samples; R.M., K.N. and P.G. performed the  
1067 HBV experiments; R.M., A.A., P.T. and H.K. designed the SLE experiments; A.A. provided  
1068 the SLE patients samples and executed SLE patient samples experiments; R.M. and A.K.  
1069 performed the SLE *in-vitro* experiments; B.S.R., R.M. and P.T. performed the SLE mice  
1070 related experiments; A.C. helped in procuring critical reagents; R.M. and H.K. wrote the  
1071 manuscript; and H.K. supervised the entire project.

1072

1073

1074 **Conflict of interests:** The authors declare no conflict of interests.

1075

1076

1077 **Data and materials availability:** The NGS (RNA-Sequencing) data for expression profiling  
1078 reported in this paper have been deposited in the GenBank database (accession no.  
1079 GSE130005).

**Figure 1**

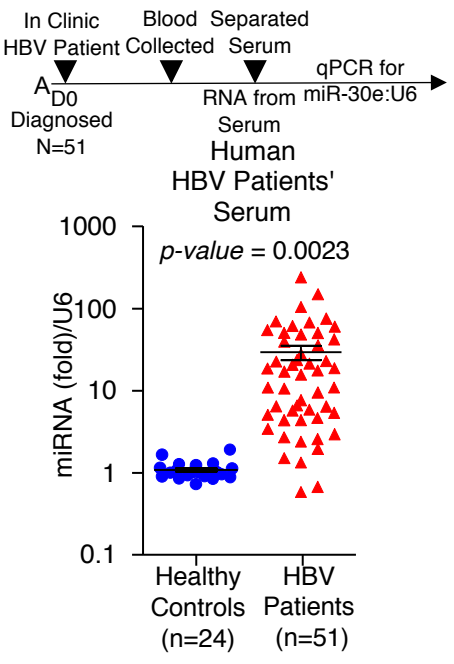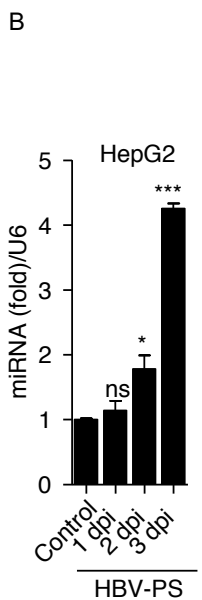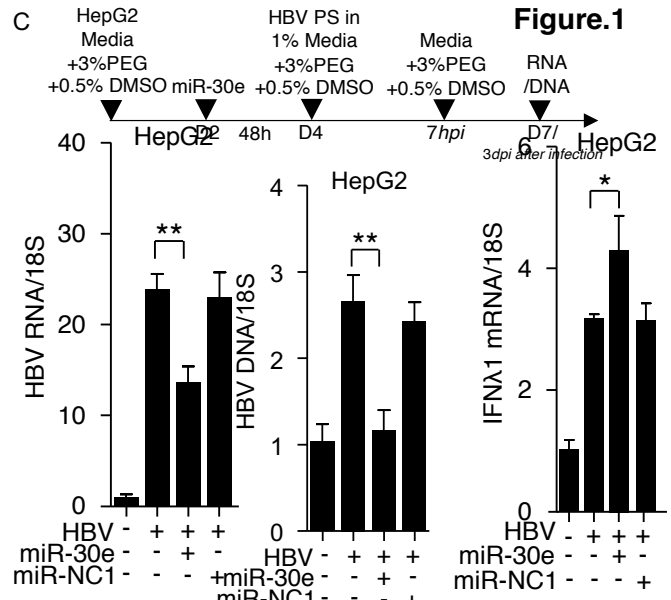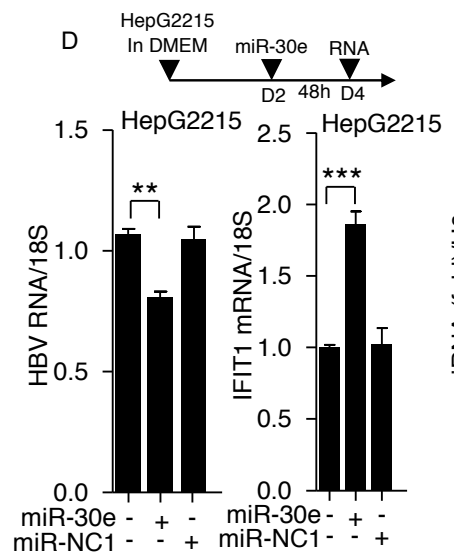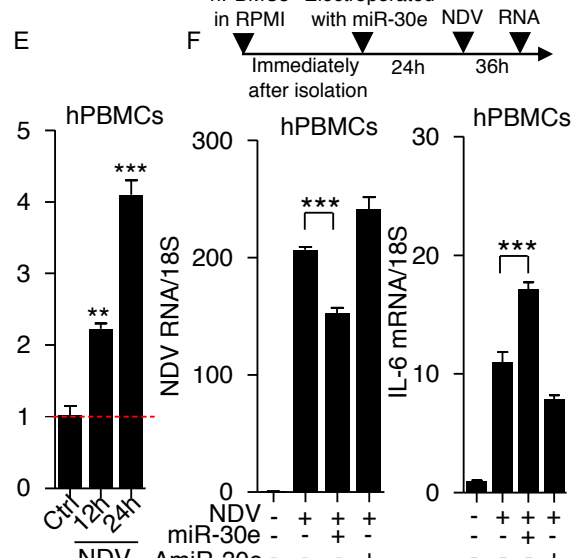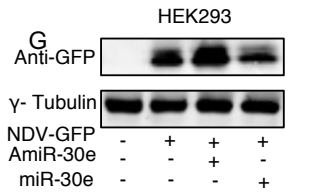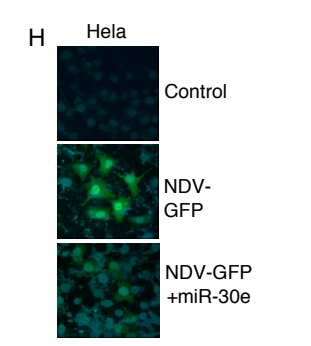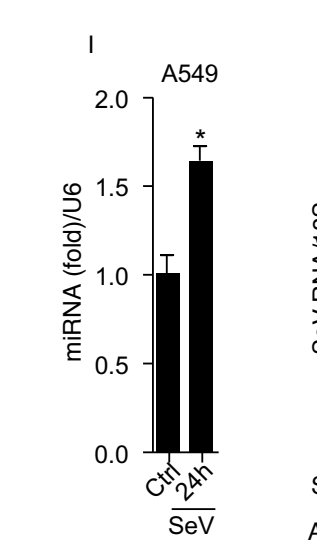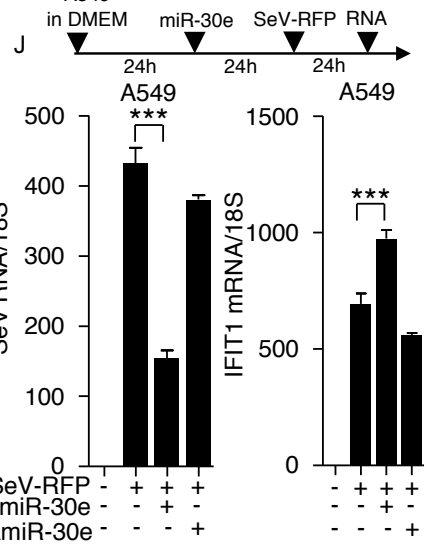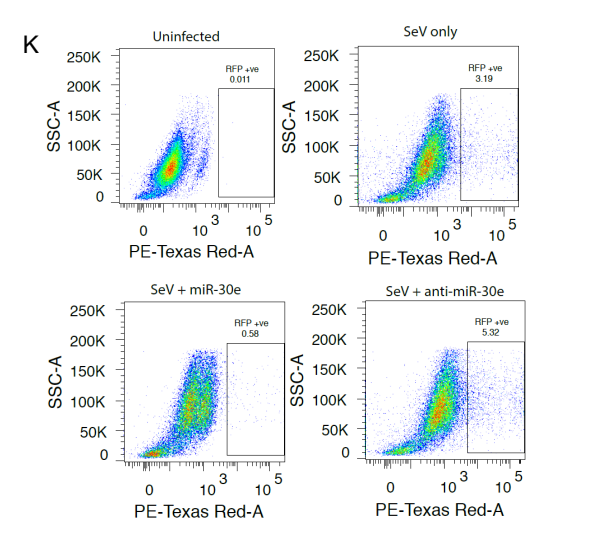

**Figure. 2**

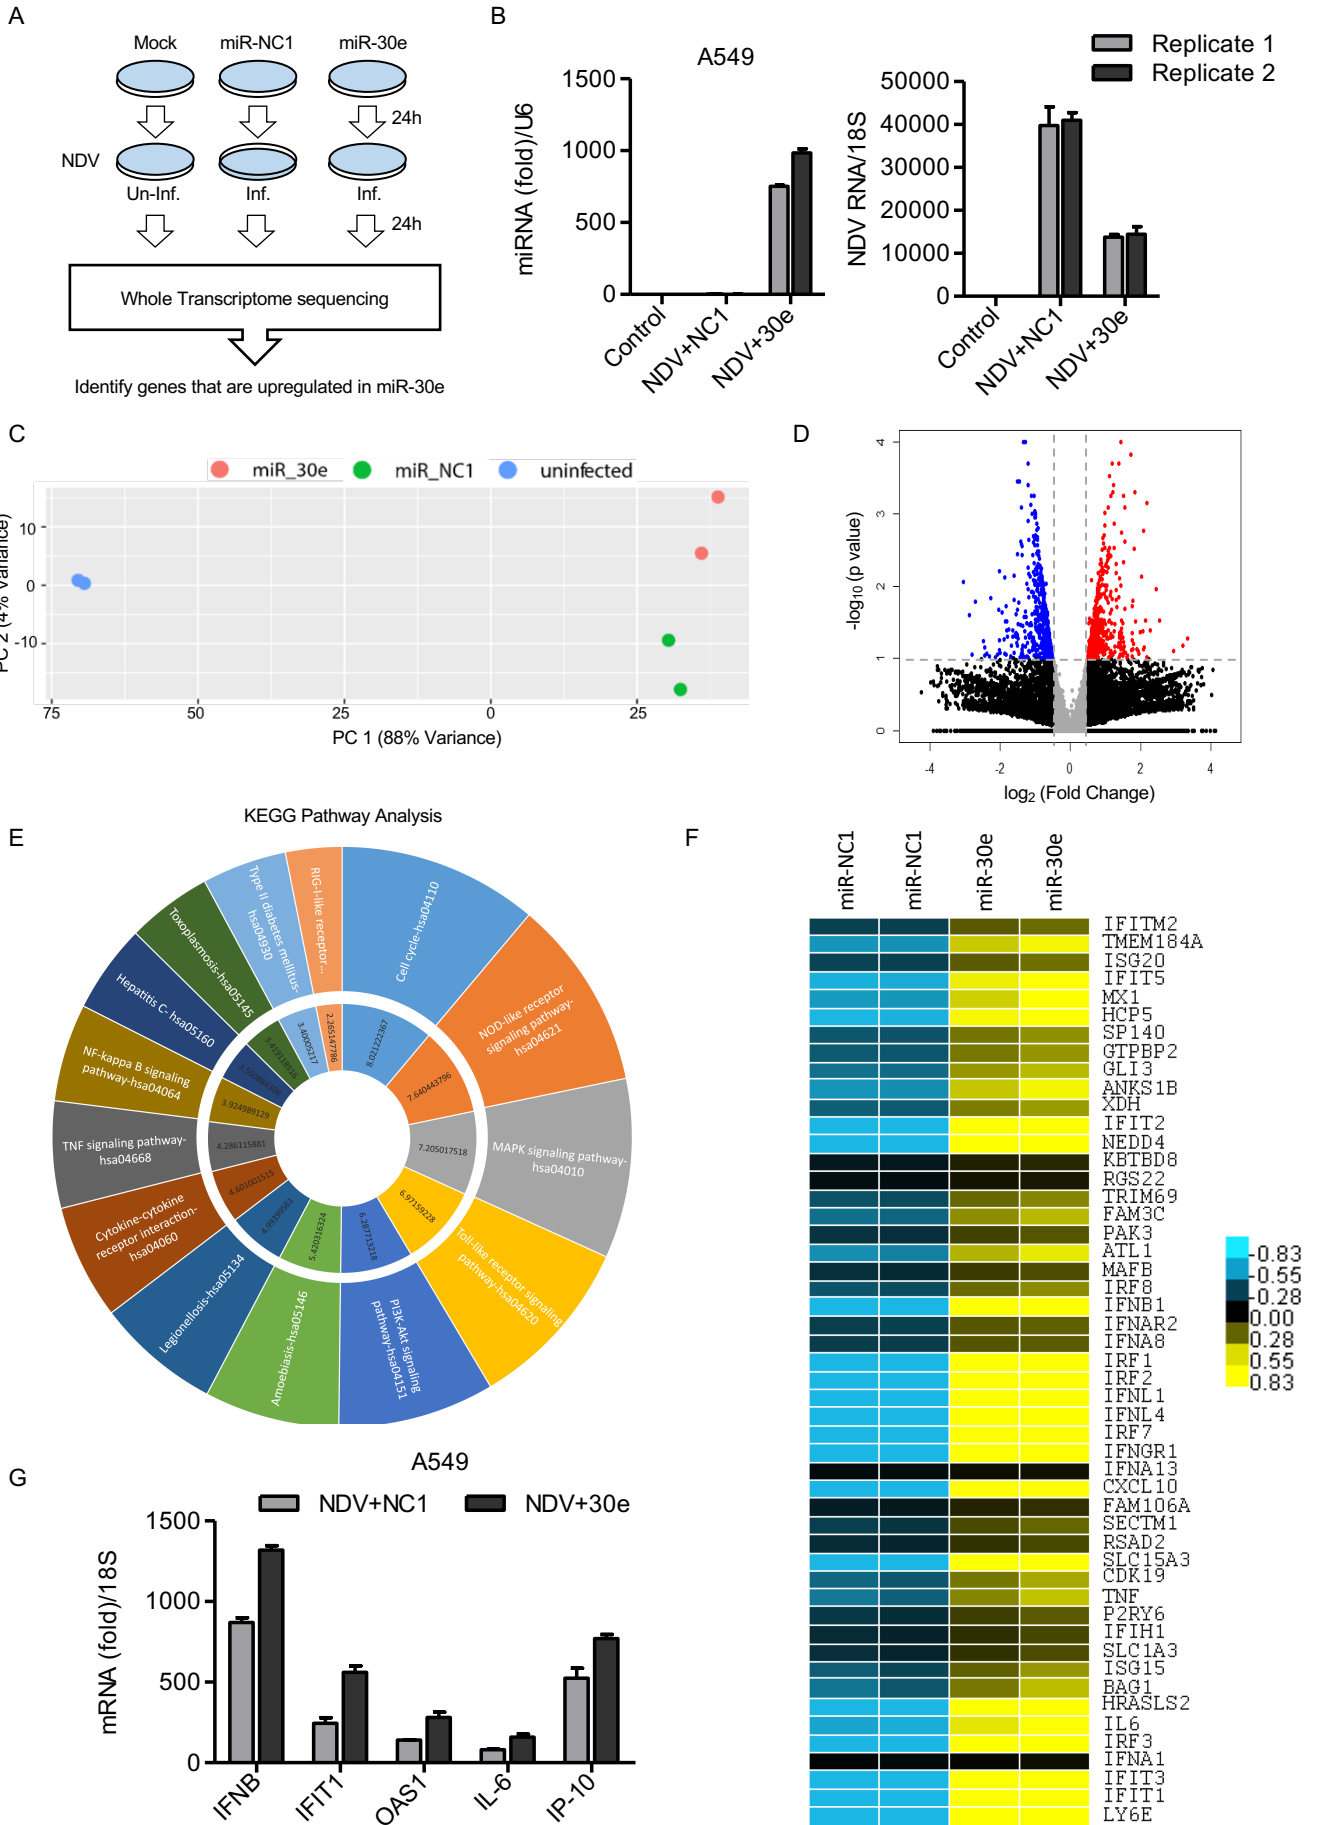

A

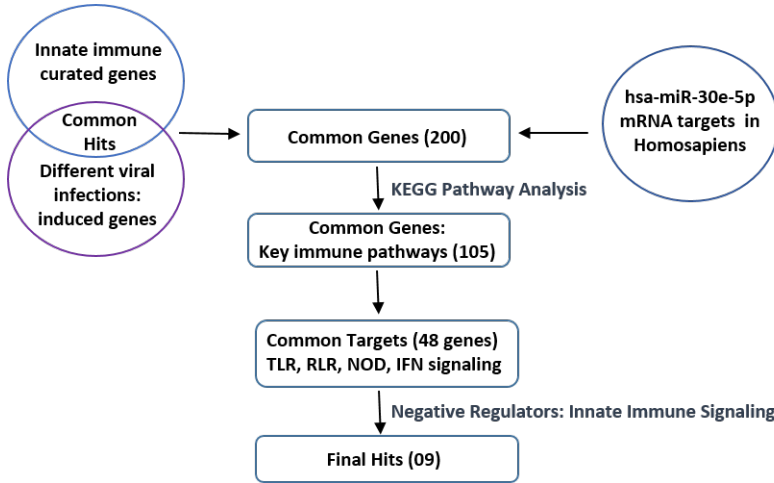

B

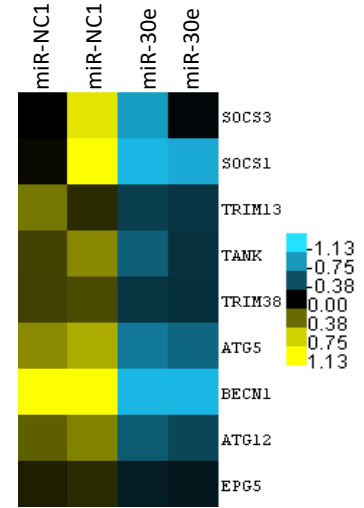

C

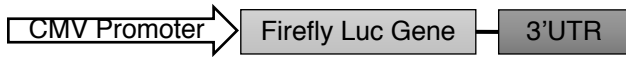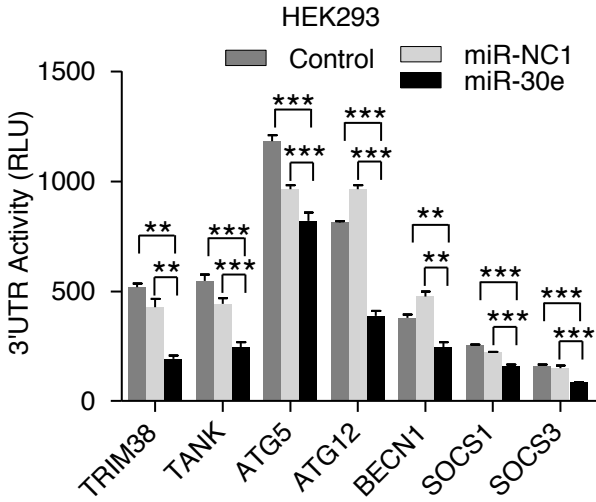

D

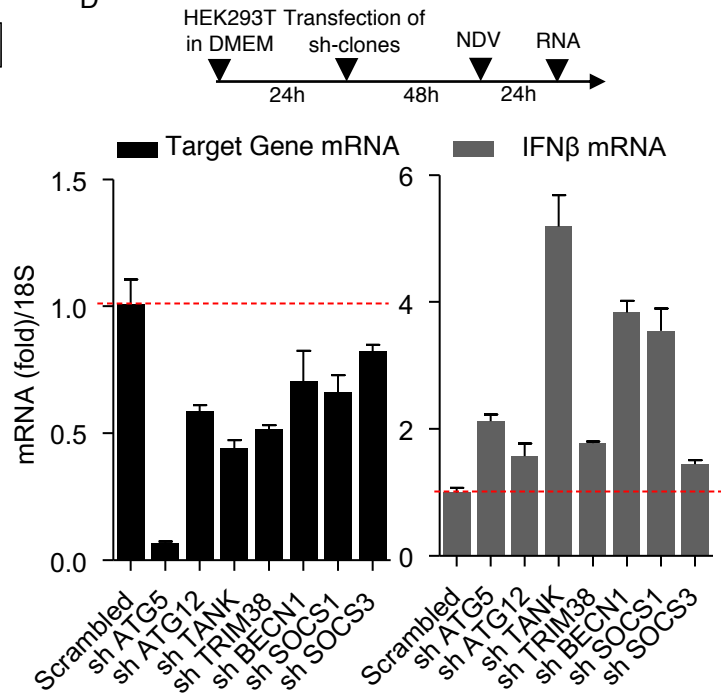

E

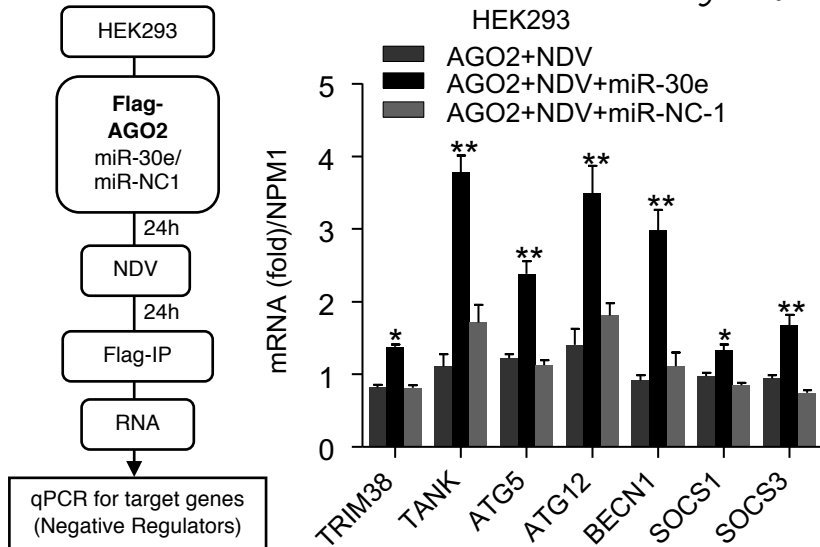

F

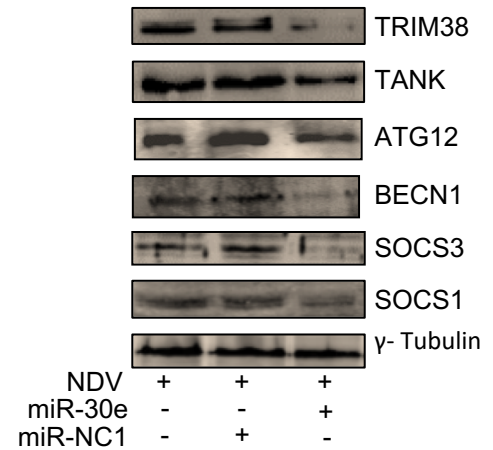

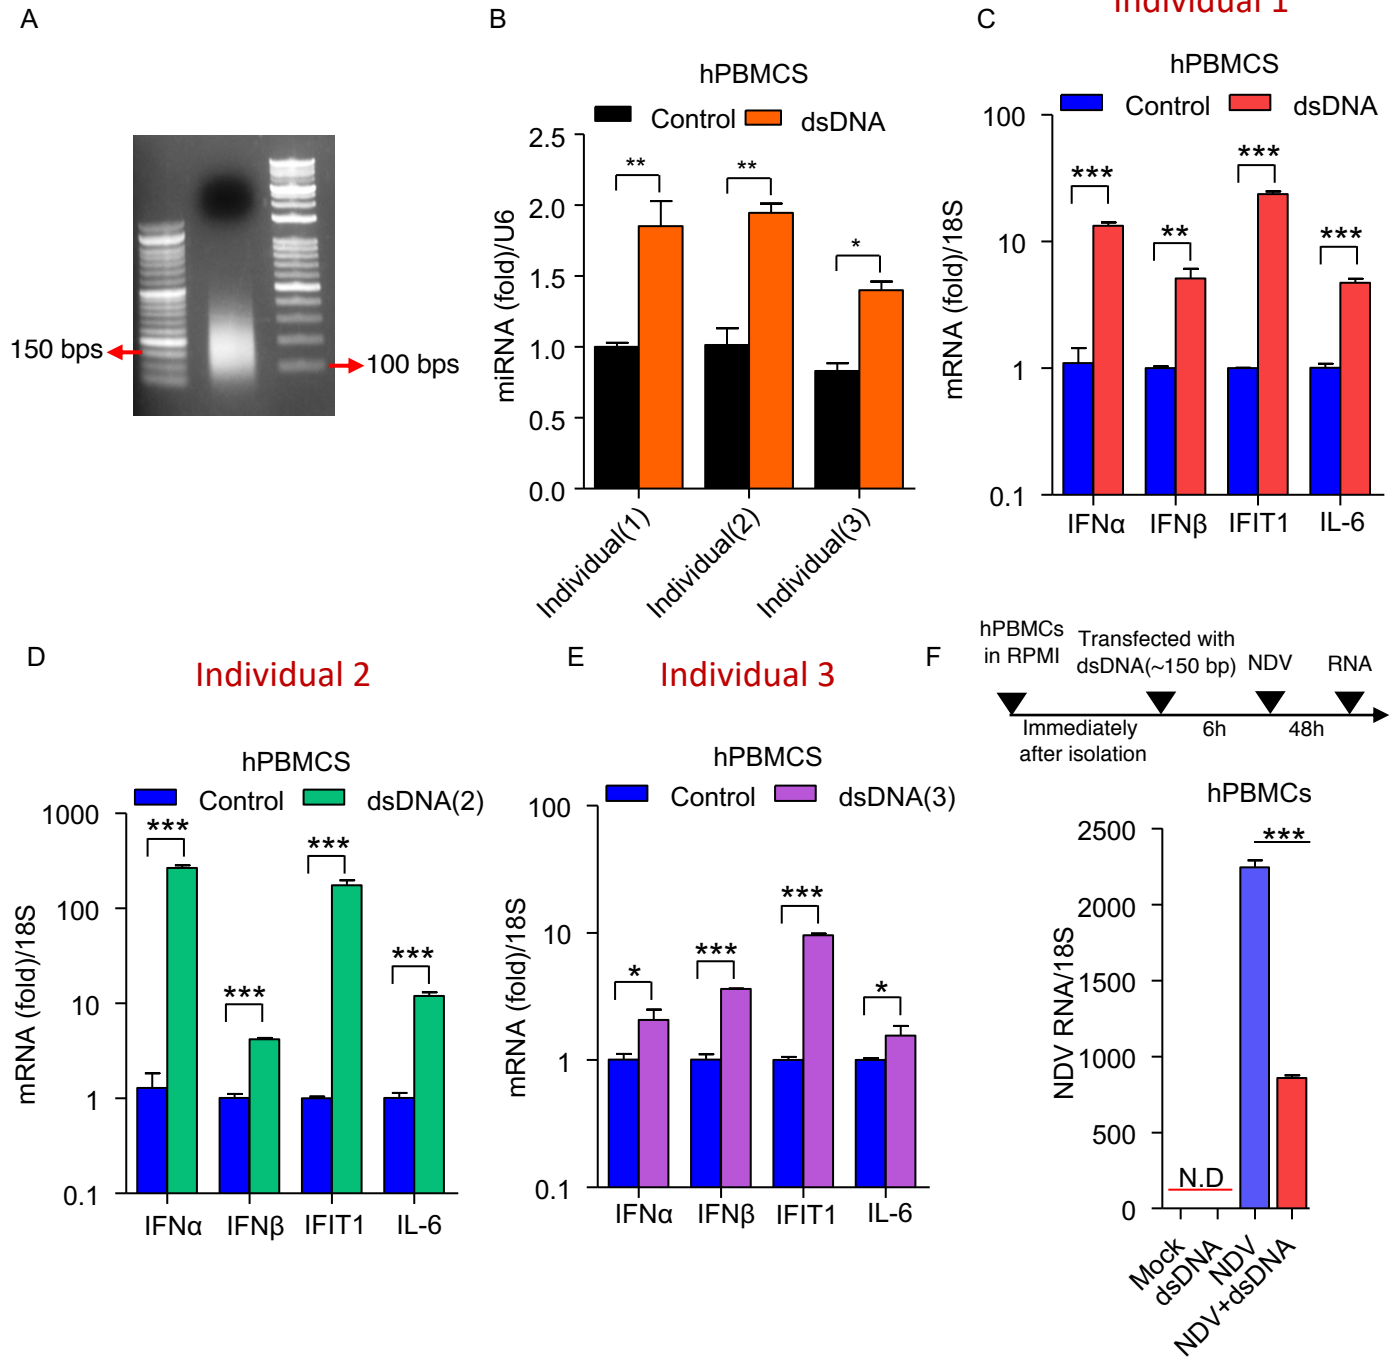



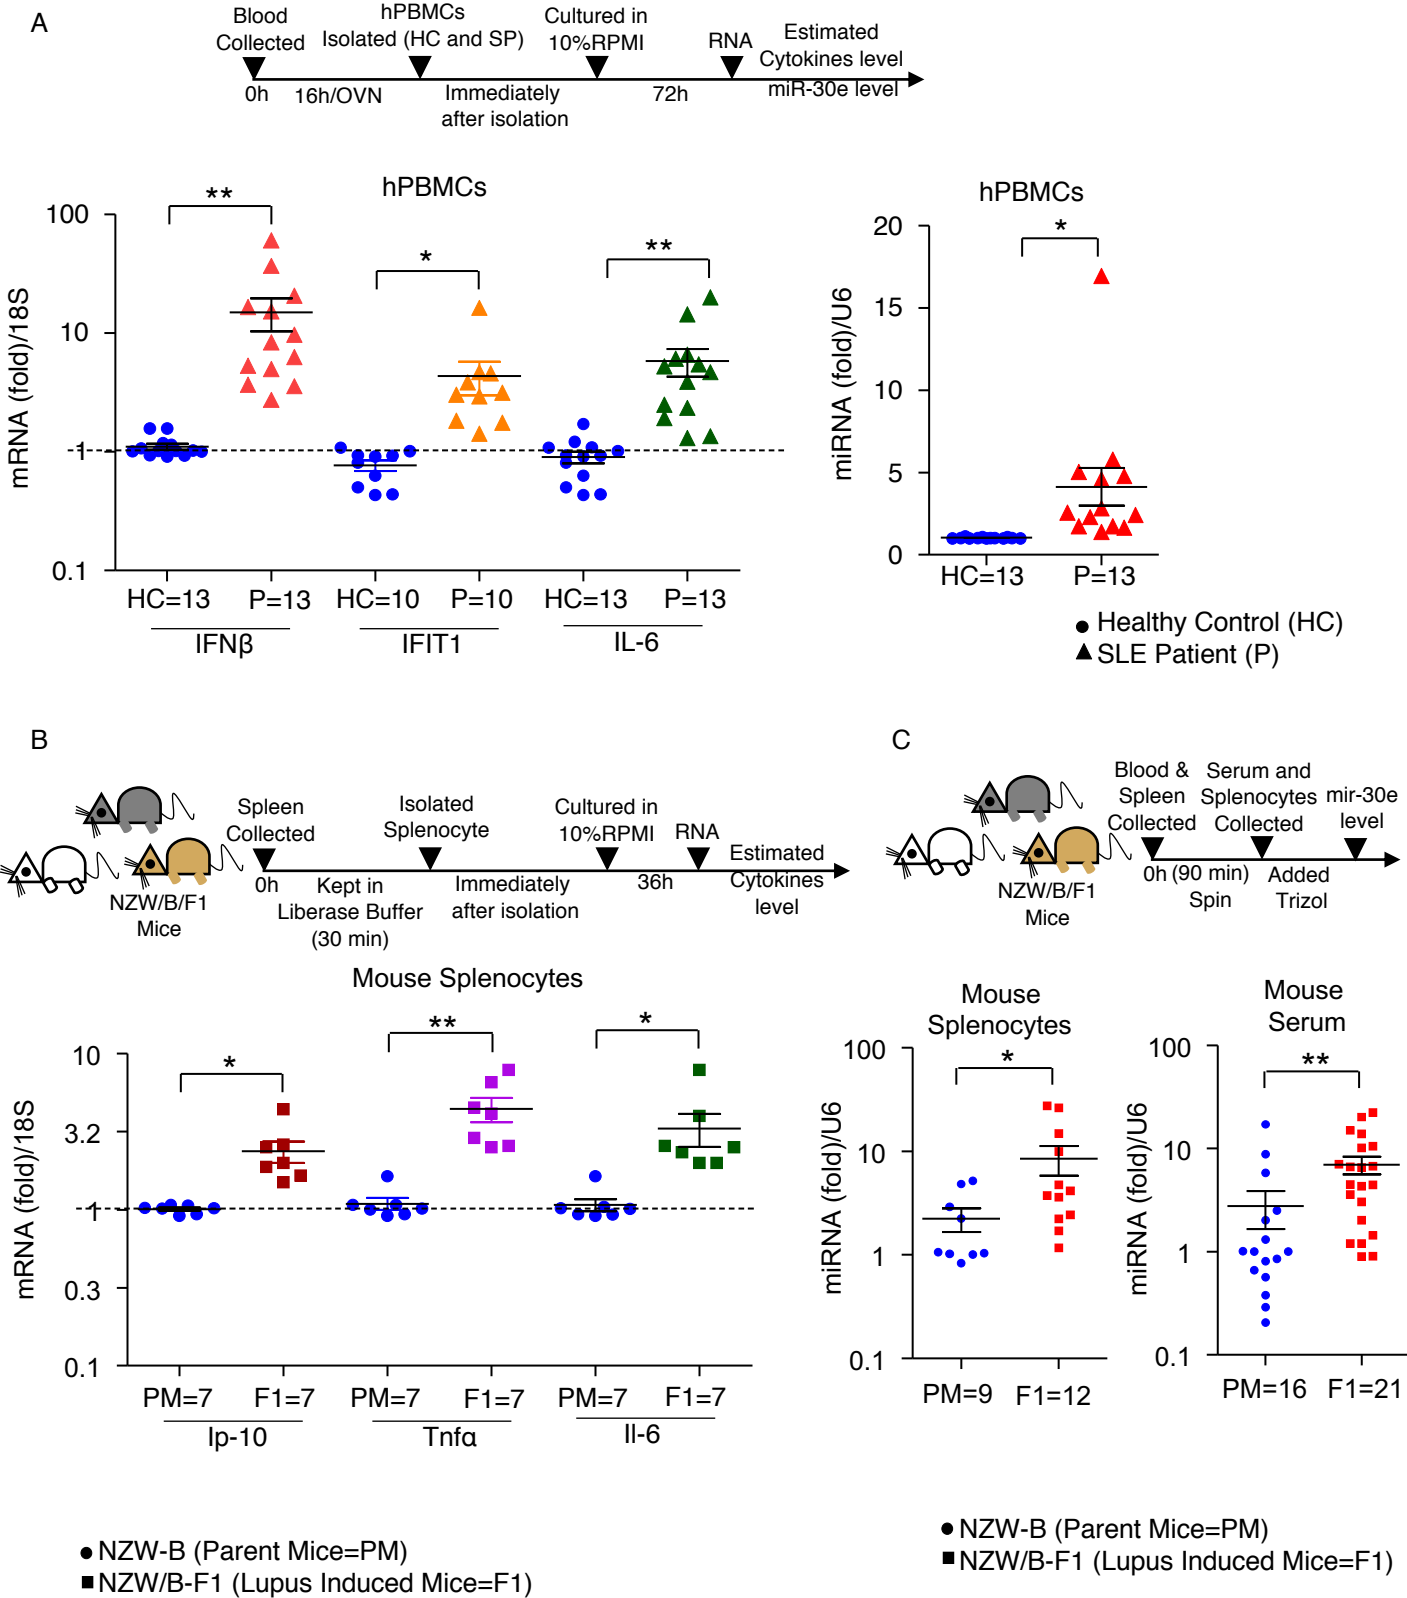

A

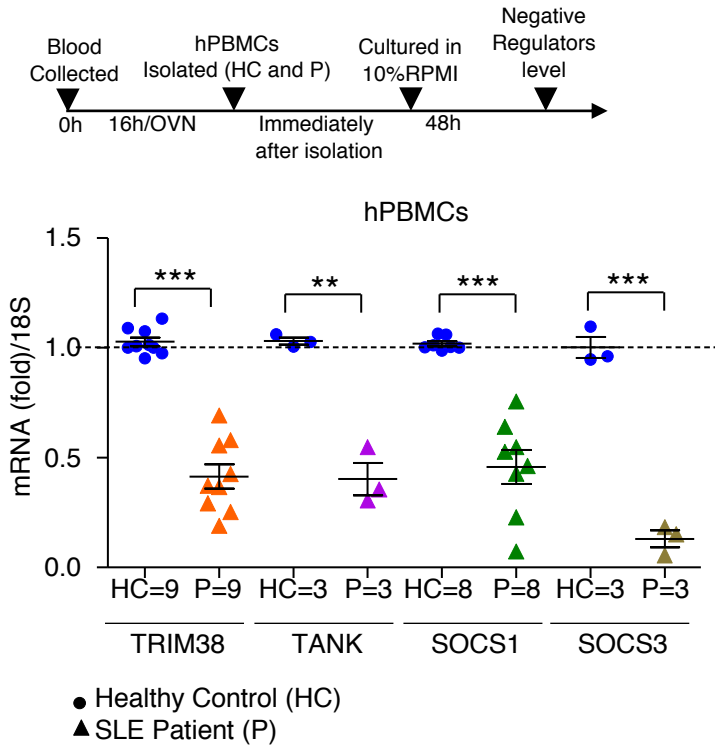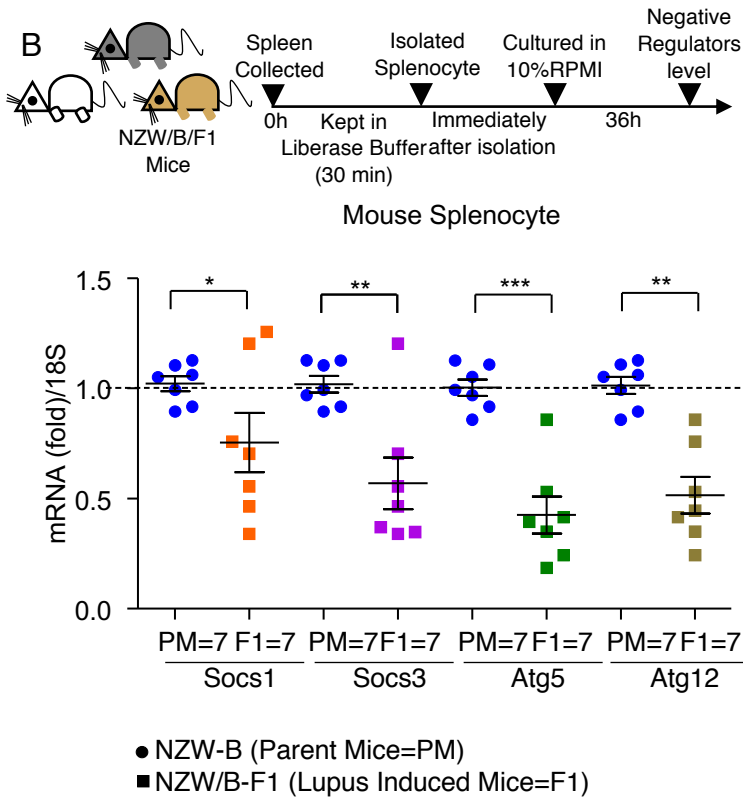

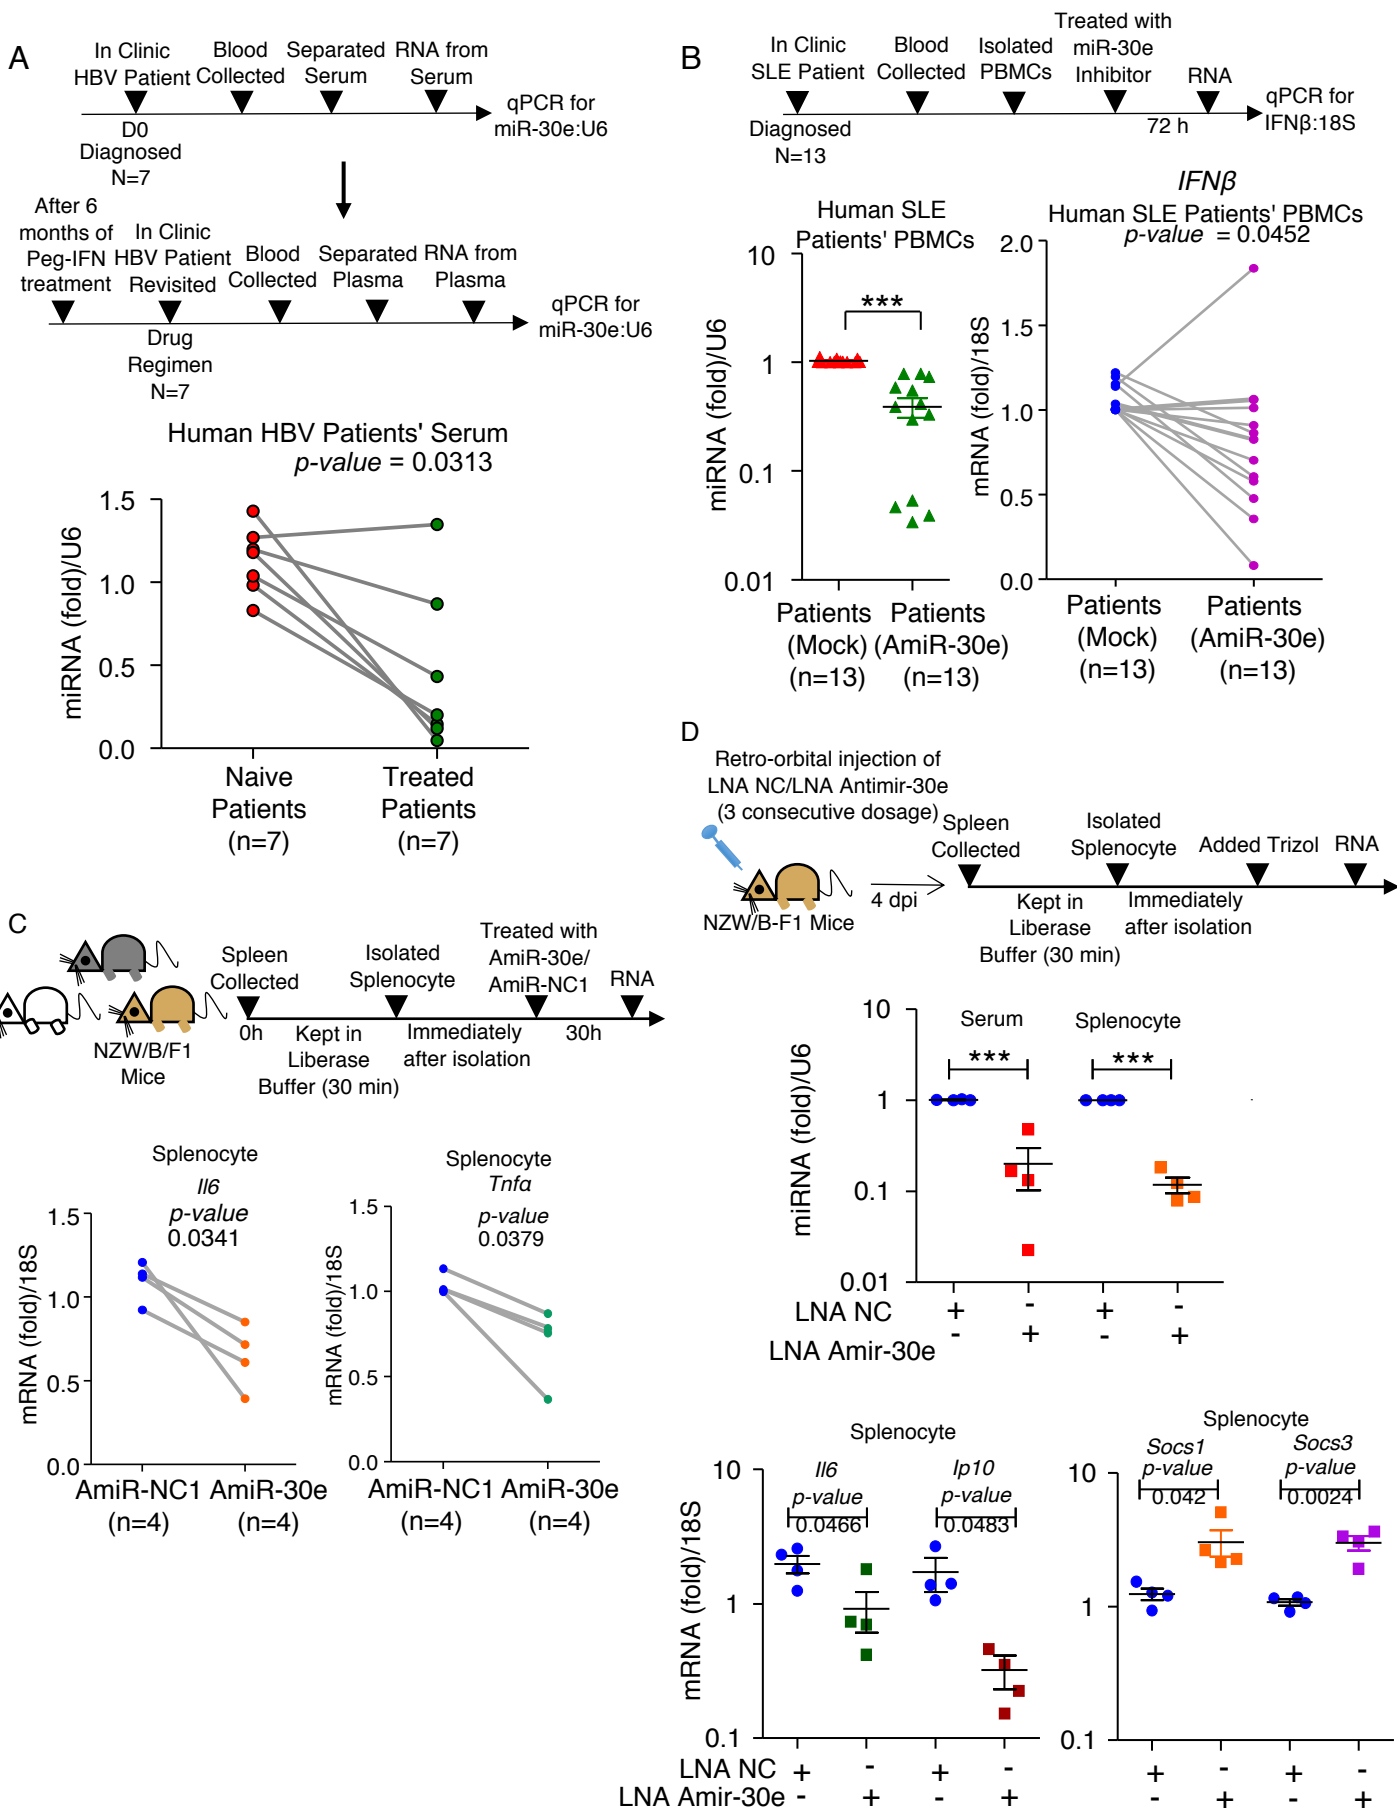

Figure. 8

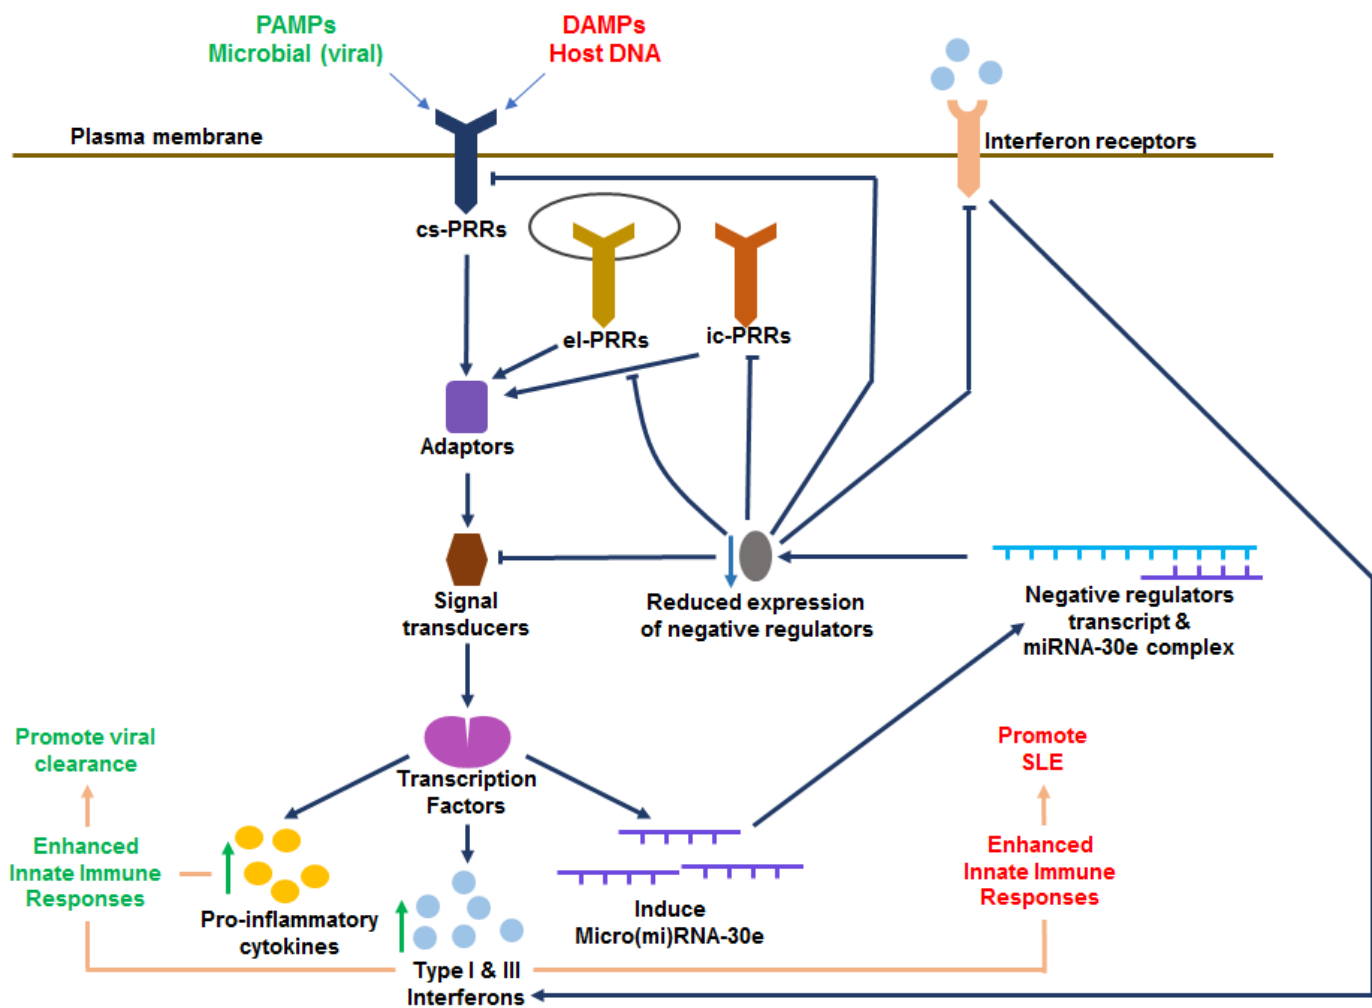

A

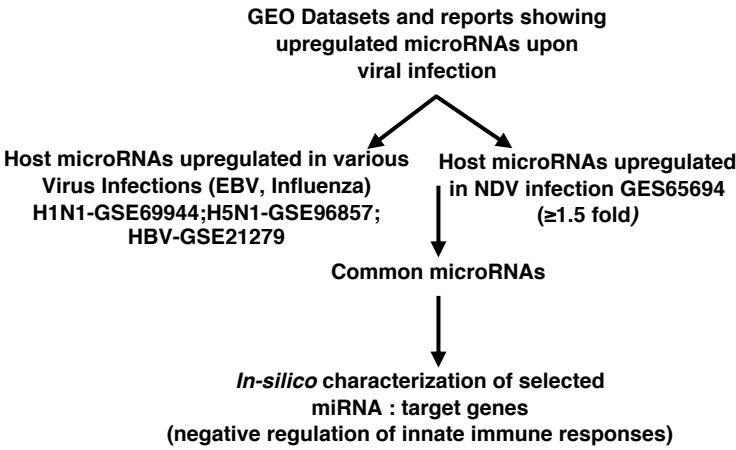

B

| S.No. | Viral Infection | Model or Cell line | Upregulated miRs | Reference |
|-------|-----------------|--------------------|------------------|-----------|
| 1.    | H5N1            | Mice               | 51               | (31)      |
| 2.    | EBV             | Patients (IM)      | 84               | (32)      |
| 3.    | NDV             | HEK-293            | 209              | (7)       |

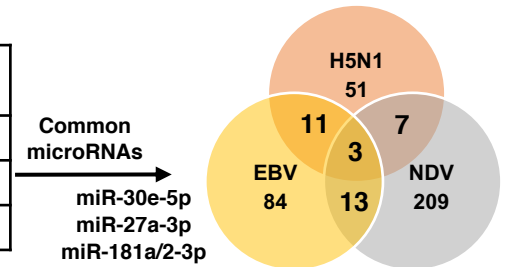

C

| miRNA         | Log FC during NDV Infection GSE65694 | Significantly Target Negative Regulation Of Innate Immune Responses (miRanda, DIANA, TargetScan, miRDB, RNA hybrid) |
|---------------|--------------------------------------|---------------------------------------------------------------------------------------------------------------------|
| miR-30e-5p    | 1.69                                 | ****<br>(majority of targets with high binding efficiency towards miRNAs)                                           |
| miR-27a-3p    | 1.54                                 | *                                                                                                                   |
| miR-181a/2-3p | 1.5                                  | *                                                                                                                   |

Common microRNA  
↓  
miR-30e-5p

D

5' \*\*\*\*\* 3'

hsa-miR-30e-5p UGUAAACAUCUU  
 mmu-miR-30e-5p UGUAAACAUCUU  
 rno-miR-30e-5p UGUAAACAUCUU  
 mml-miR-30e-5p UGUAAACAUCUU  
 gga-miR-30e-5p UGUAAACAUCUU  
 chi-miR-30e-5p UGUAAACAUCUU  
 dre-miR-30e-5p UGUAAACAUCUU  
 bta-miR-30e-5p UGUAAACAUCUU

E

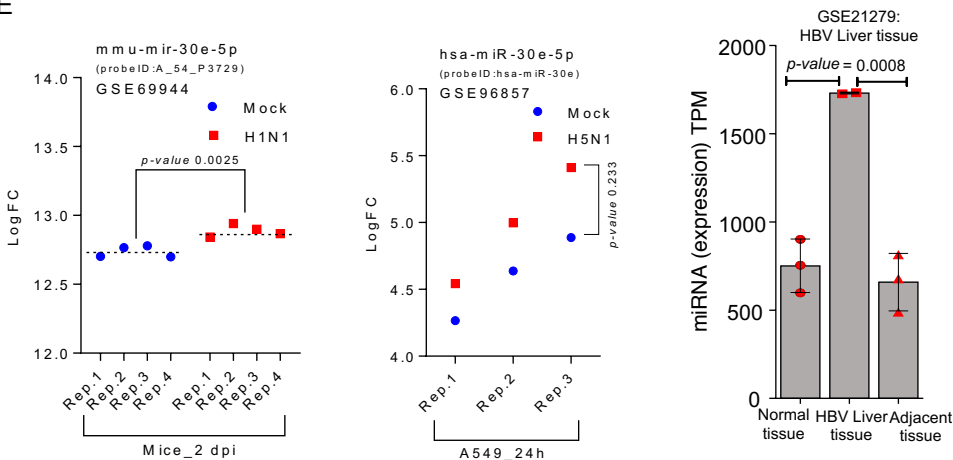

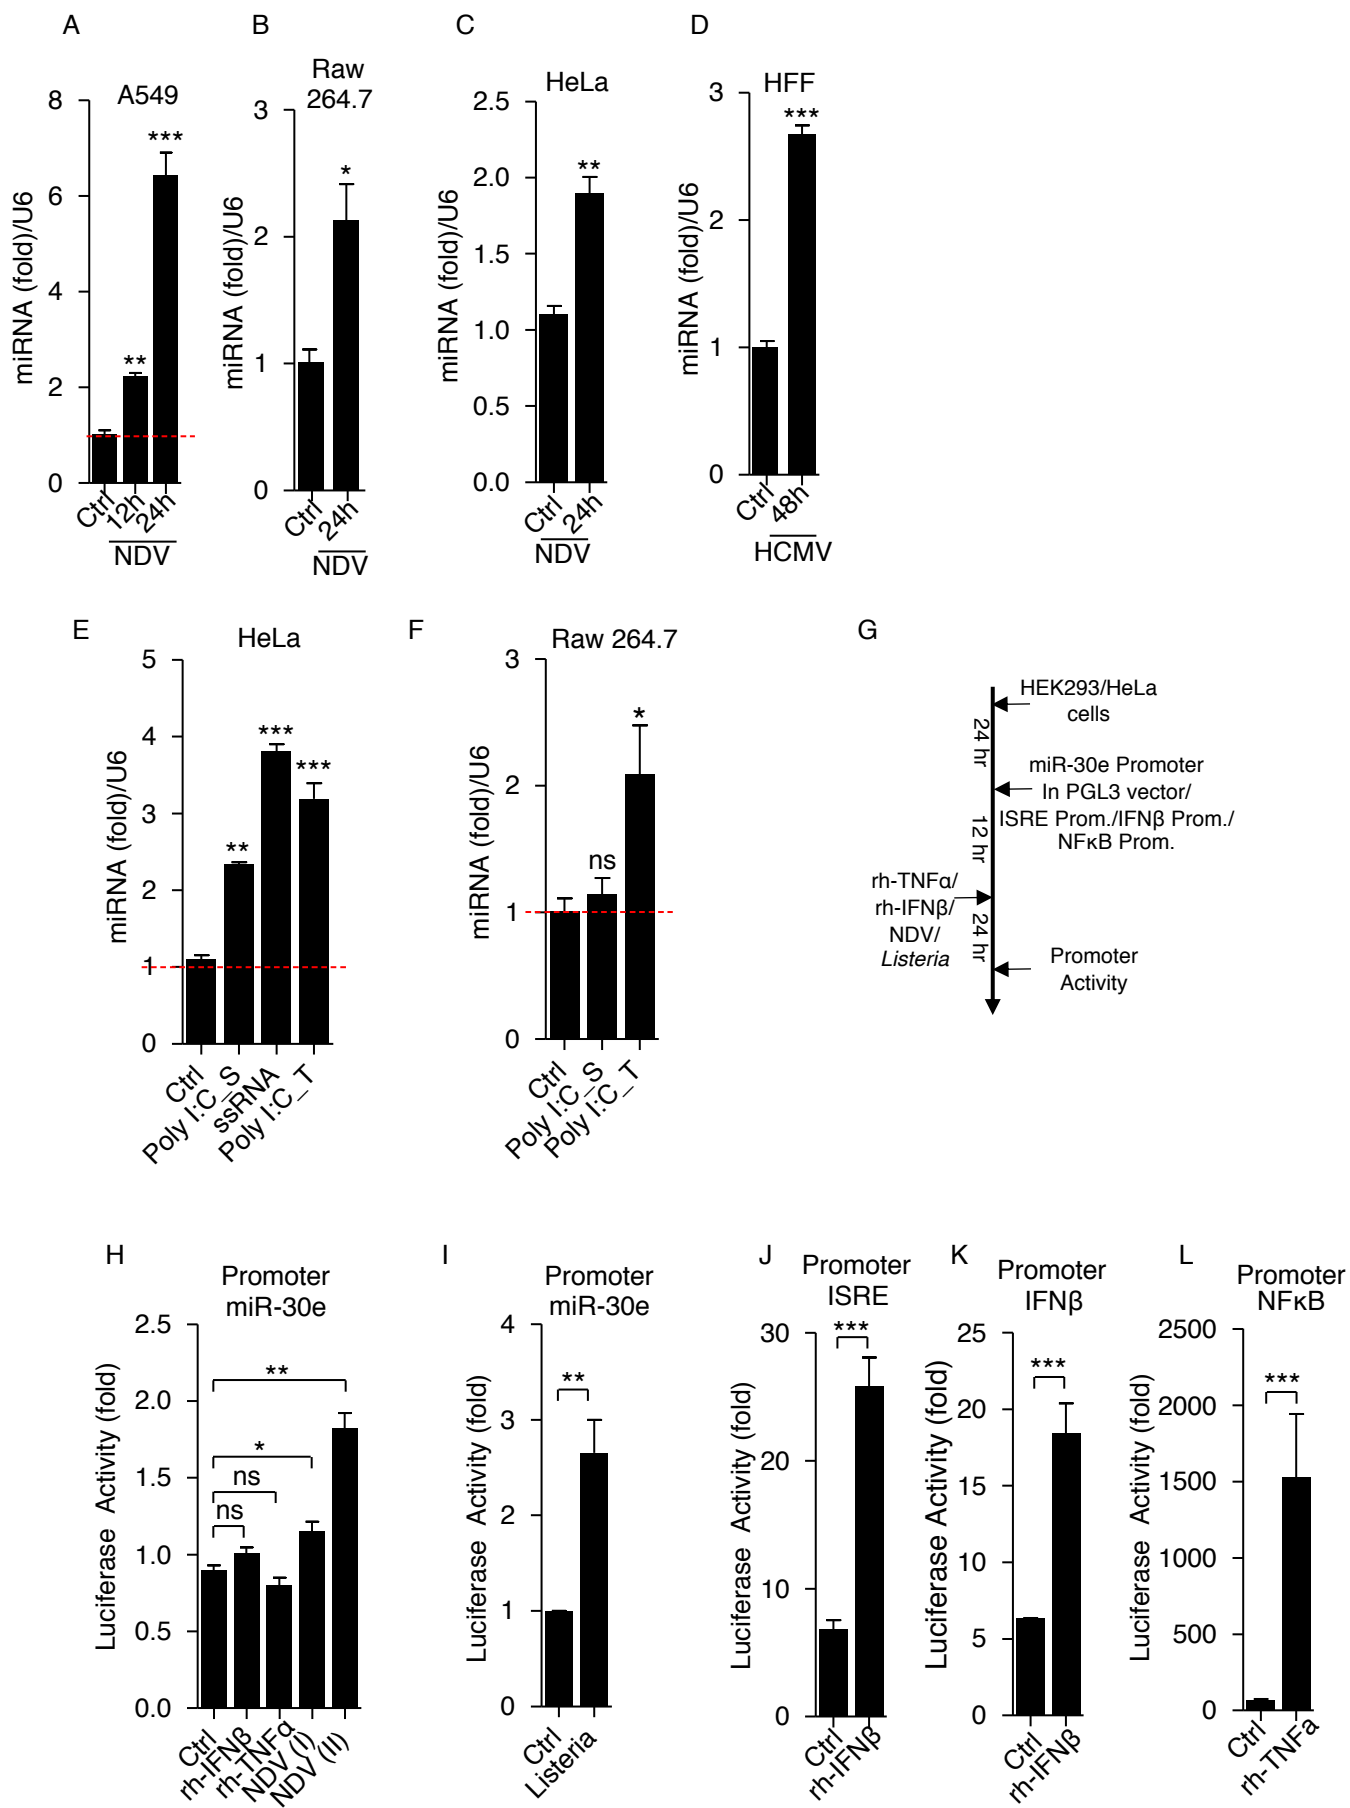

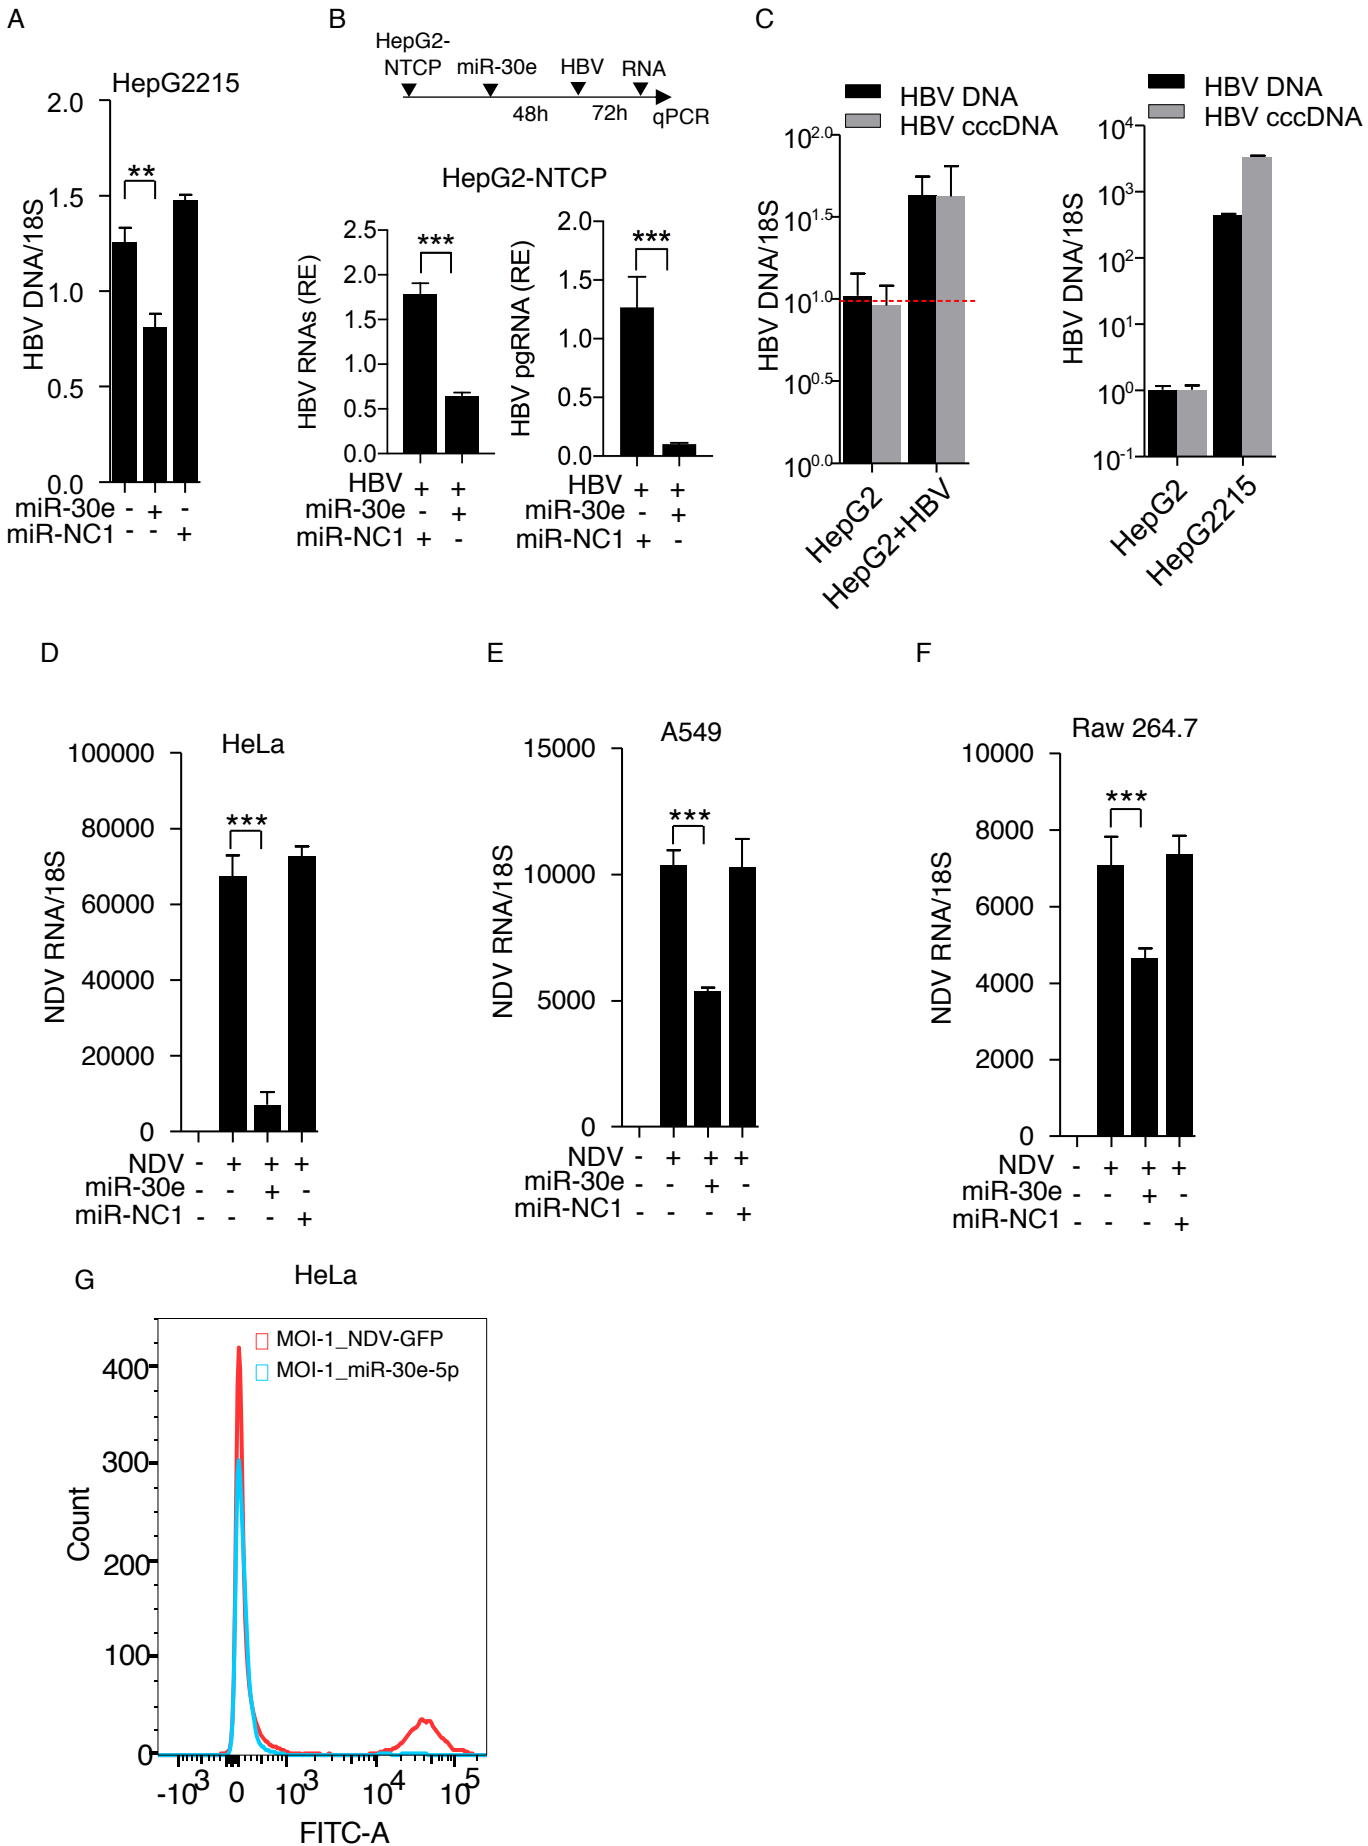

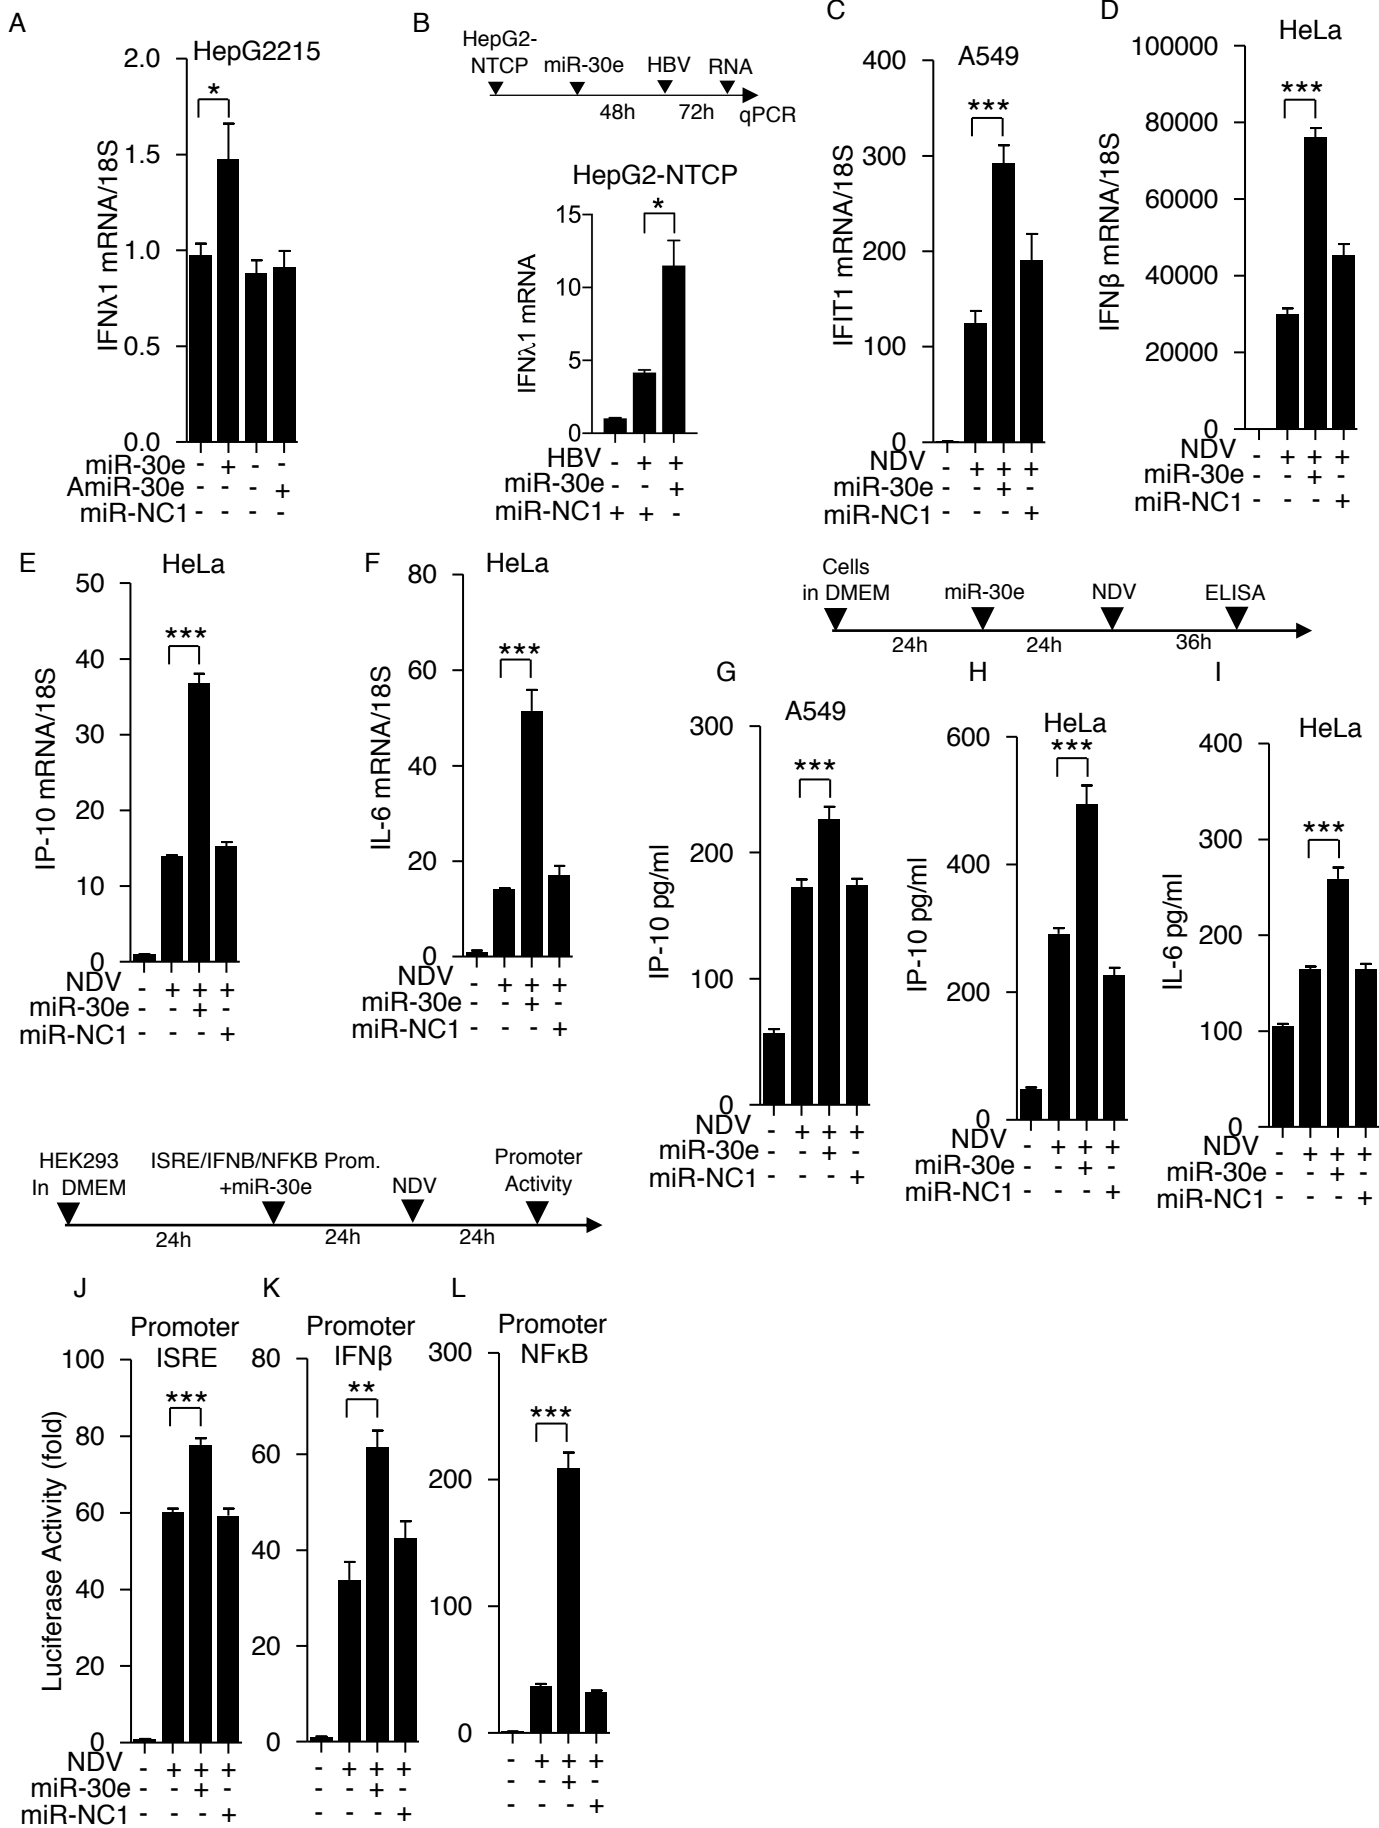



A

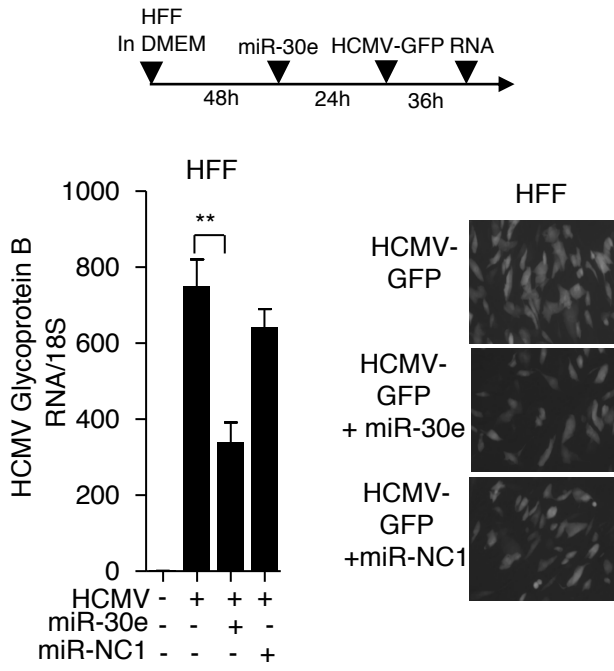

B

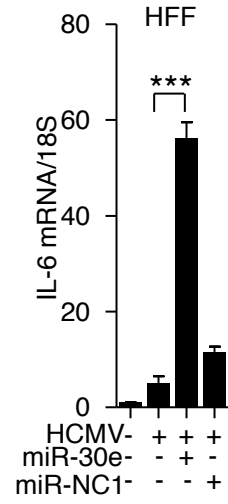

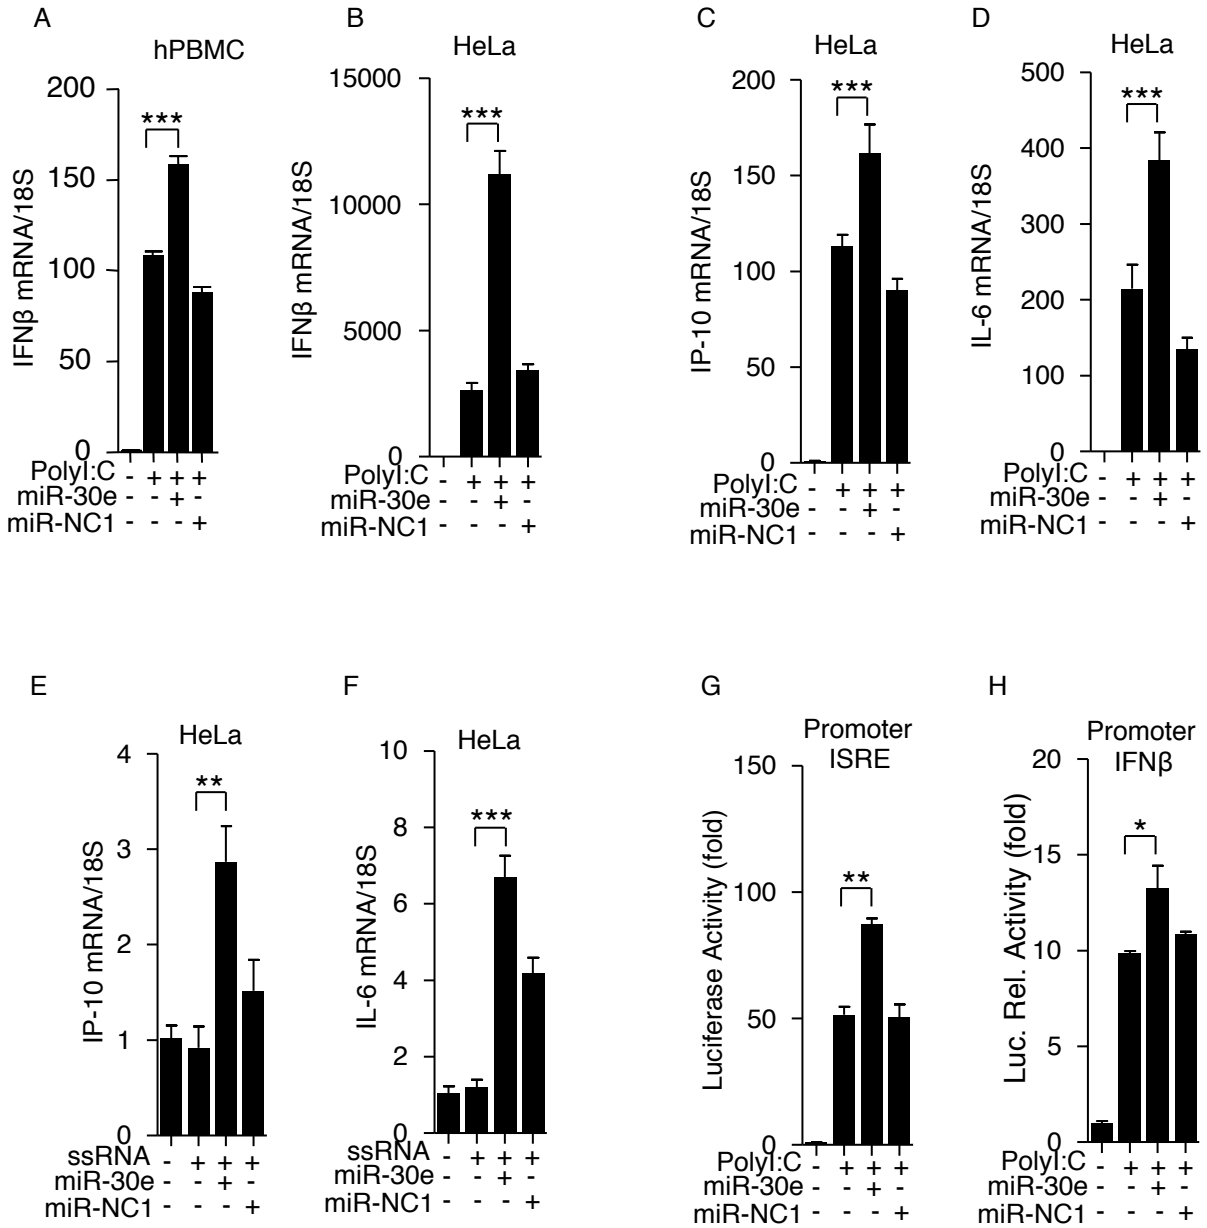

A

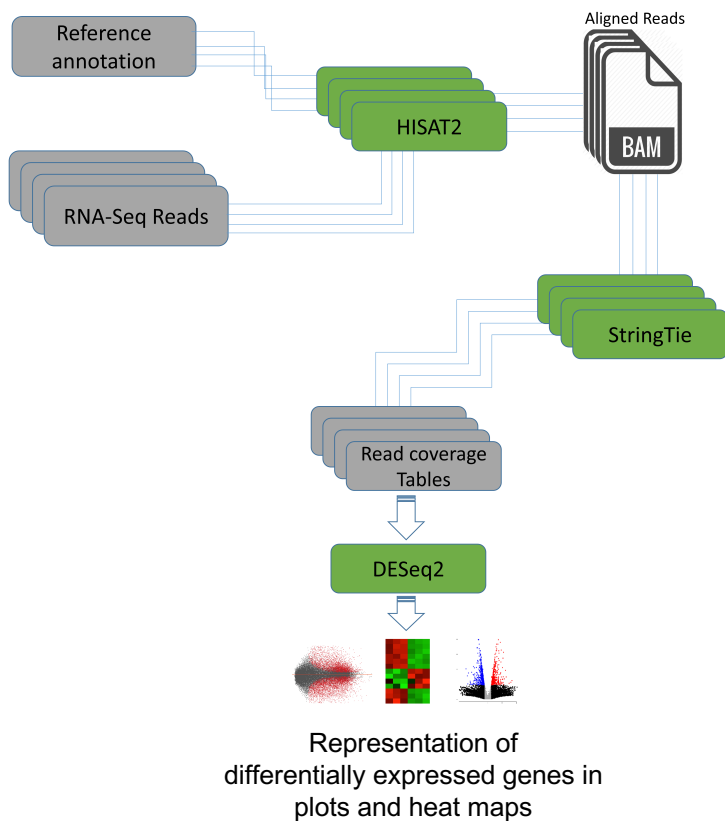

B

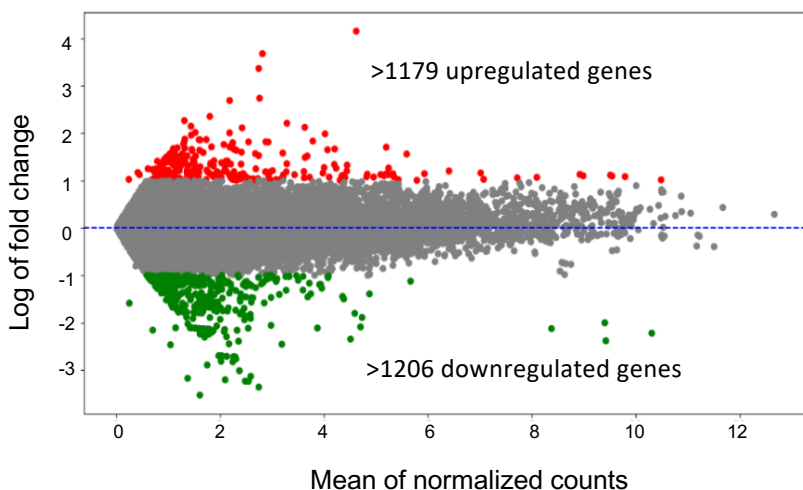

C

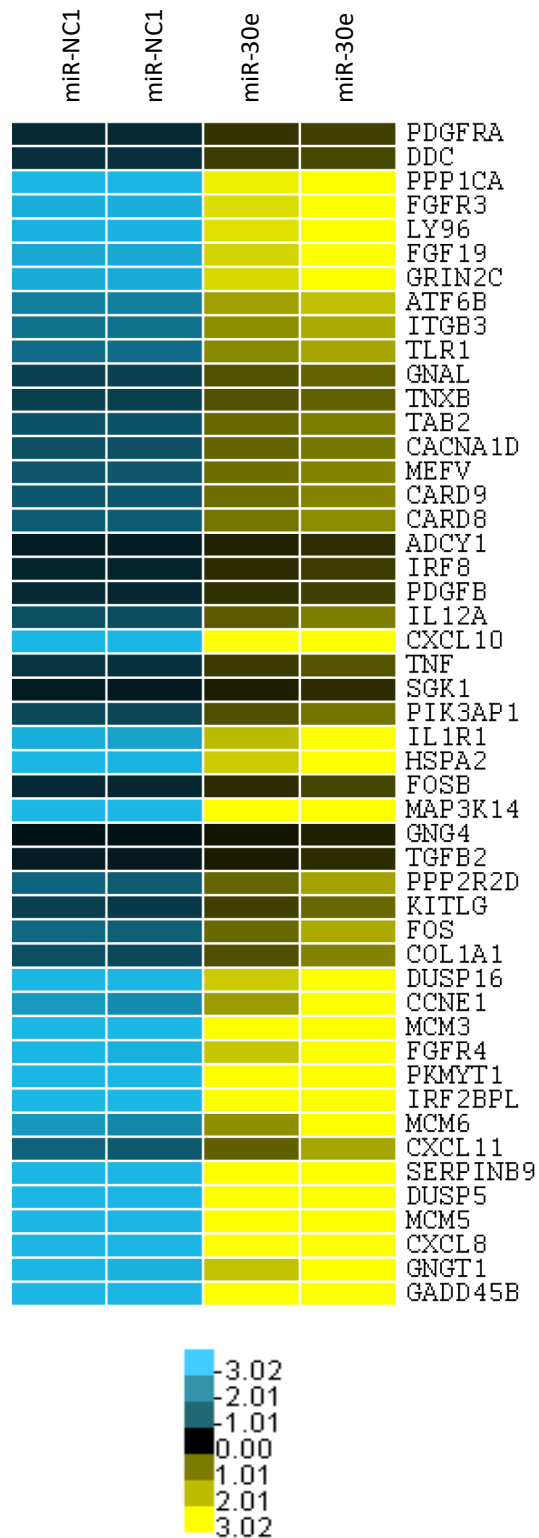

Top genes involved in KEGG Pathway Enrichment

TRIM 38

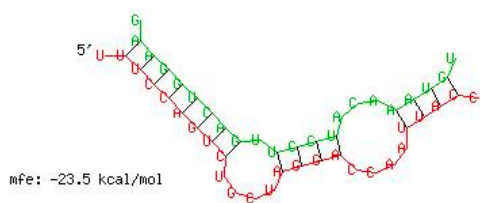

TRIM13

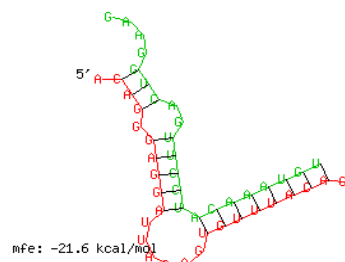

TANK

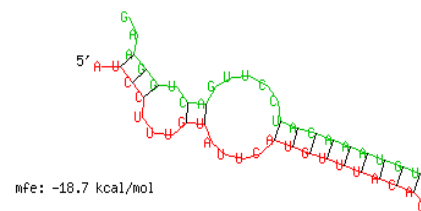

ATG 5

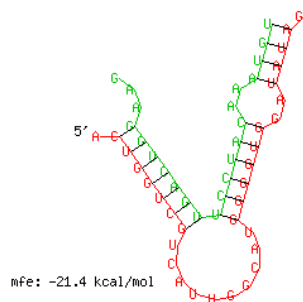

ATG 12

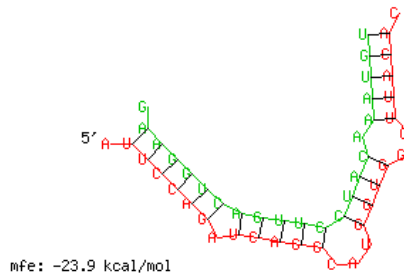

BECN1

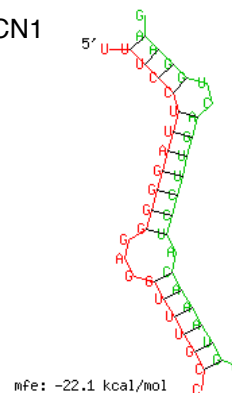

EPG5

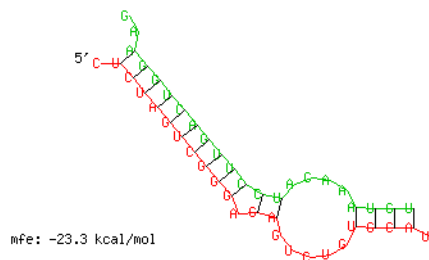

SOCS1

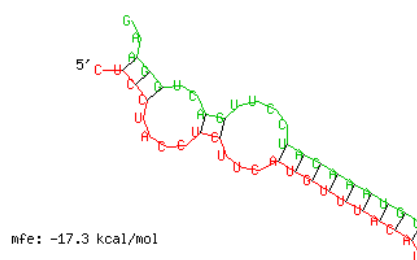

SOCS3

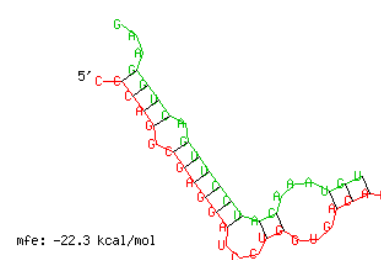

JAK1

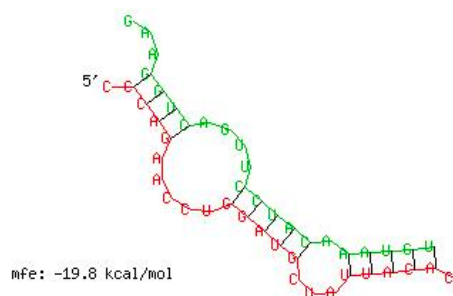

STAT1

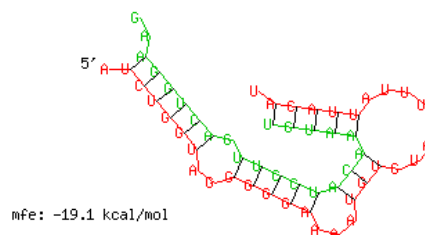

A

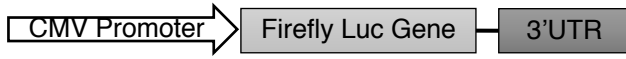

5' \*\*\*\*\* 3'

TRIM38 3'UTR: AAUUA**AUGUUUAC**UGAUAAU  
 TANK 3'UTR: UAUUC**AUGUUUAC**AGUGCUA  
 ATG12 3'UTR: UUUUA**AUGUUUAC**AUUUAUCU  
 ATG5 3'UTR: UUCCU**AUGUUUAC**AGUCUG  
 BECN1 3'UTR: AGUAC**AUGUUUACA**  
 SOCS1 3'UTR: UCUUC**AUGUUUACA**  
 SOCS3 3'UTR: UAAUA**AUGUUUACA**

hsa-miR-30e-5p: UUC**CUACAA**AUGU  
 3'UTR\_WT: ATG**TTTAC**  
 3'UTR\_MUT: **xxx** | **xxx**  
 TAC**TTATC**

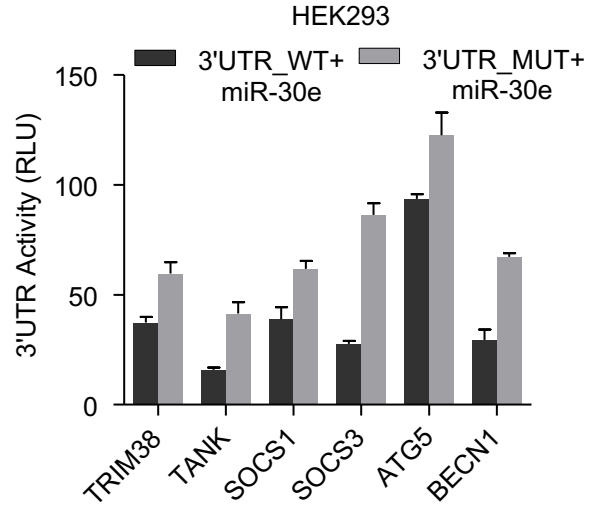

B

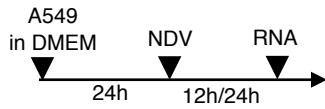

A549

12h 24h

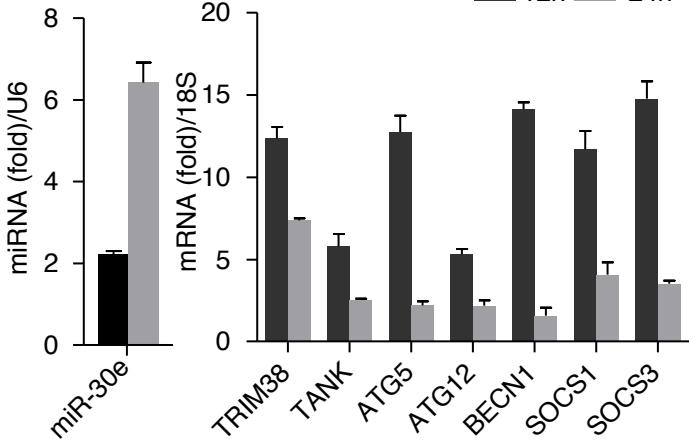

C

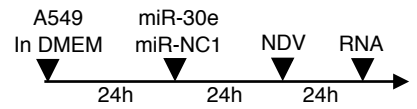

A549

NDV NDV+miR-30e NDV+miR-NC1

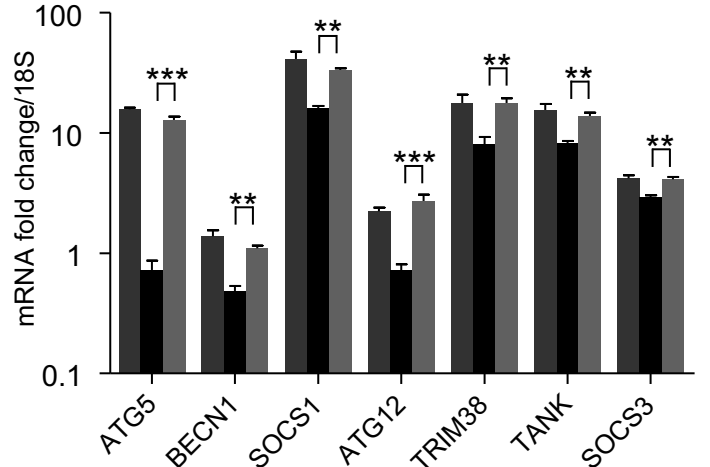

A

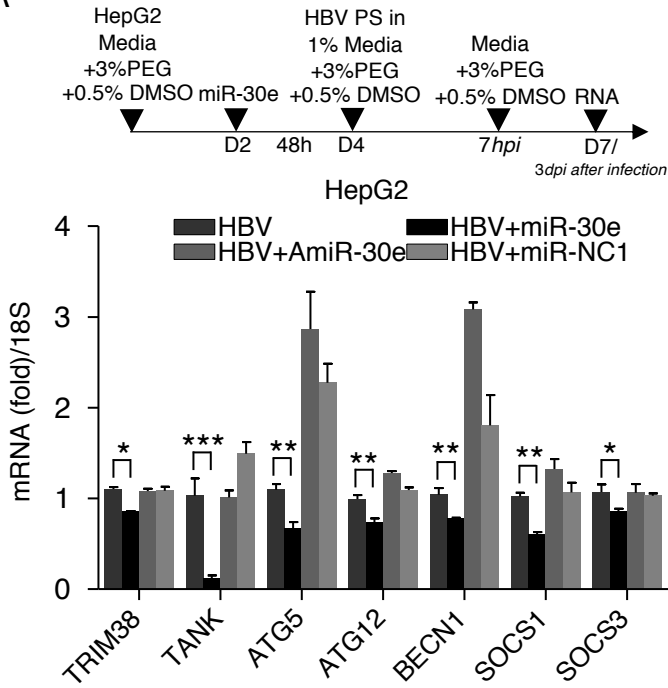

B

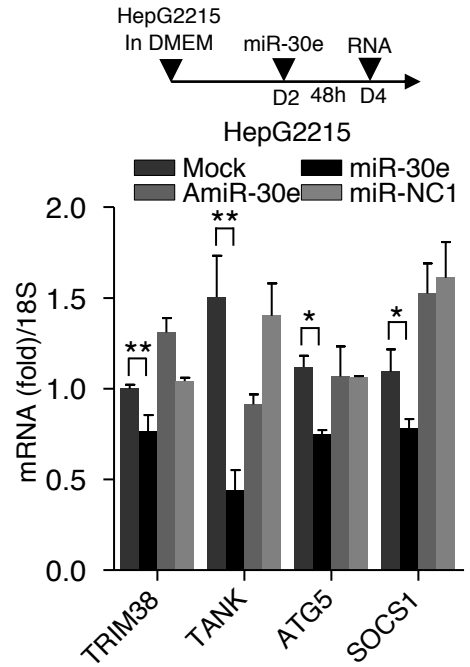

C

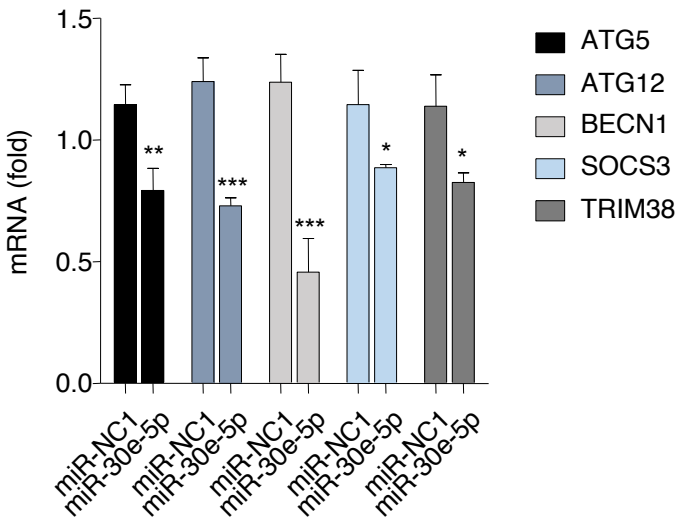

D

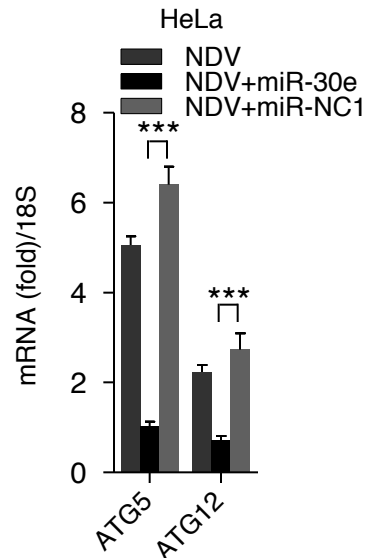

E

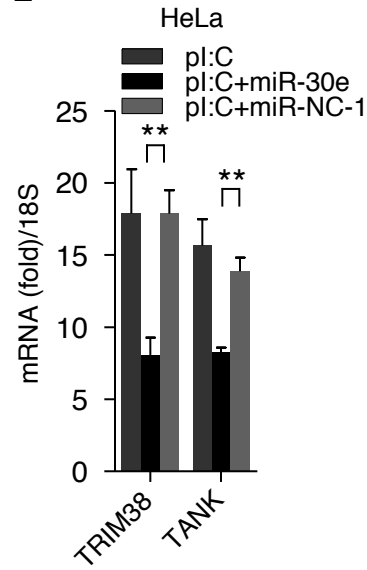

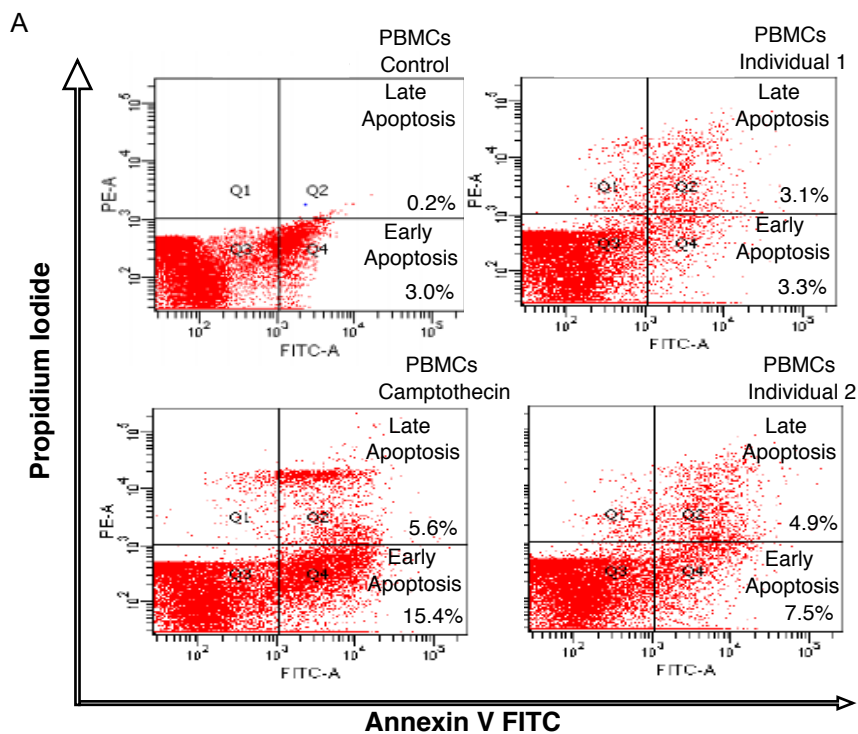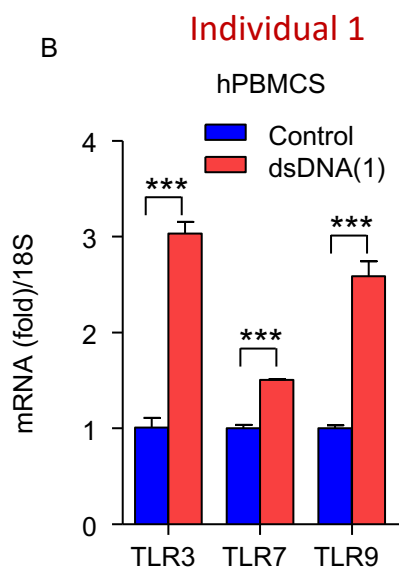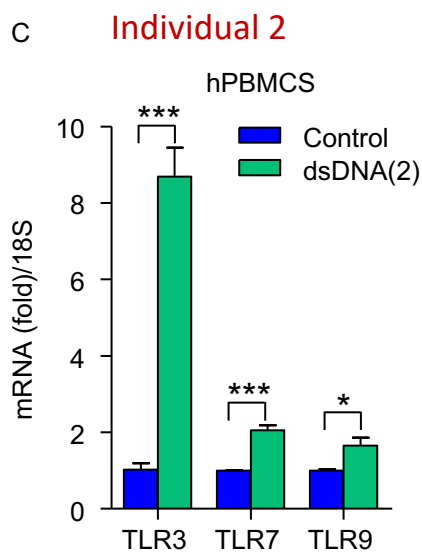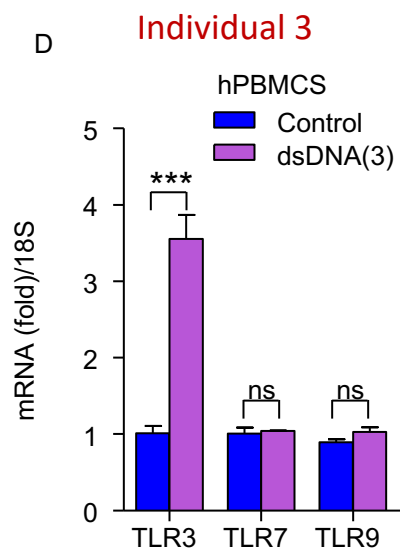

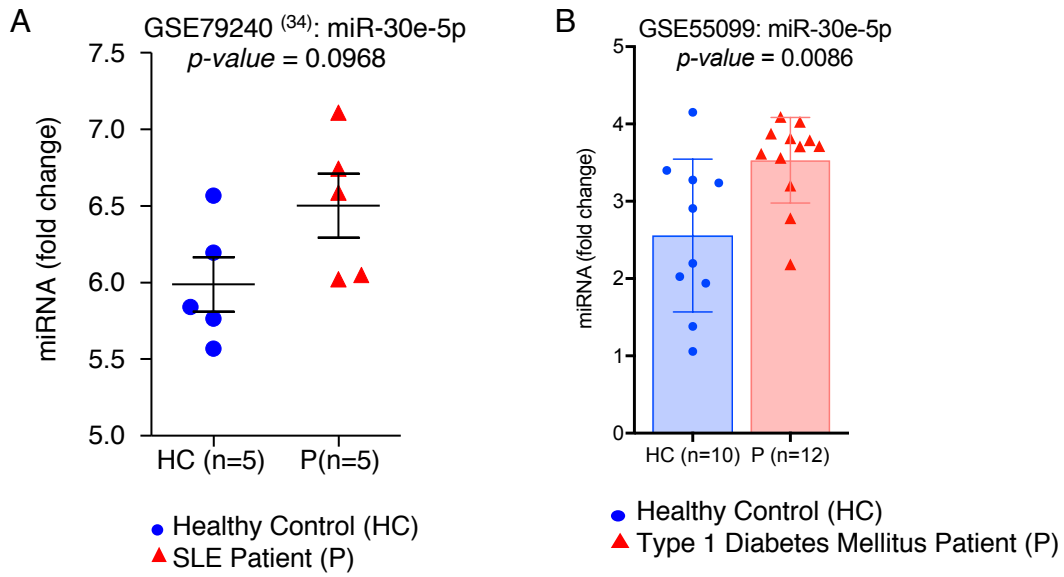



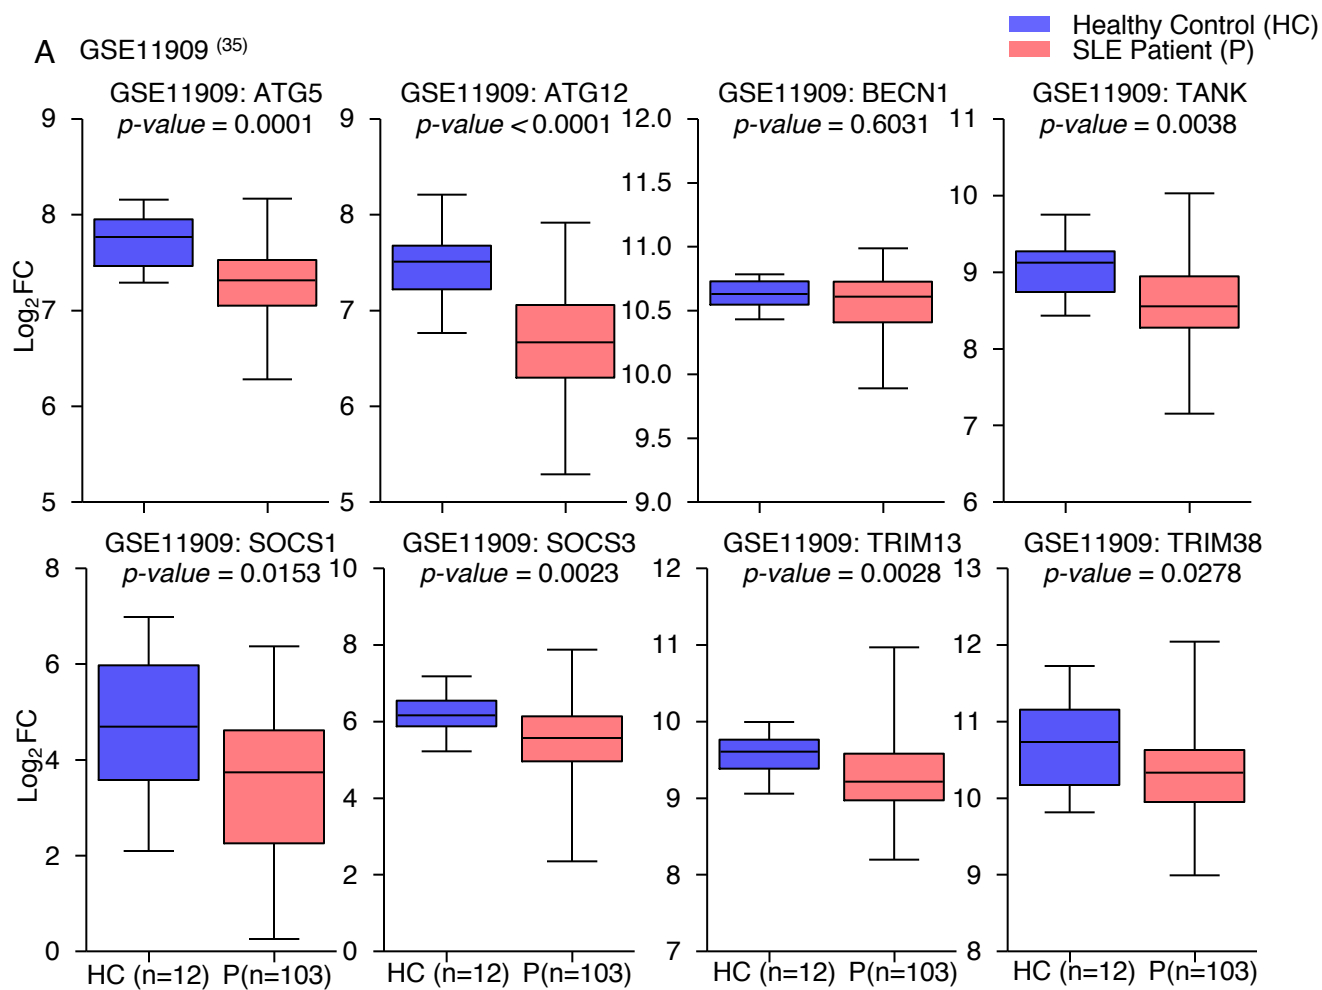

A

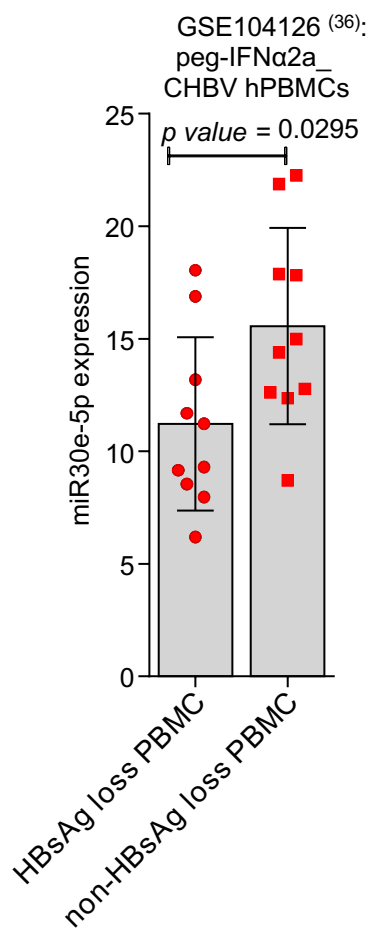

- HBsAg loss
- non-HBsAg loss

**Table T1**

|                                       | Therapy naive CHB<br>(n=51) | Control (n=24)   | <i>p-value</i> |
|---------------------------------------|-----------------------------|------------------|----------------|
| Median age (range)                    | 48(19-68)                   | 31(23-55)        |                |
| Male/Female                           | 36/15                       | 10/14            |                |
| AST<br>(reference range: 10 - 40 U/L) | 37(18-166)                  | 24(16-42)        |                |
| ALT<br>(reference range:7-56U/L)      | 36(15-130)                  | 23.5(12-48)      |                |
| HBsAg                                 | Positive                    | Negative         |                |
| Anti-HBcIgM                           | Negative                    | .....            |                |
| HbeAg                                 | 16 positive                 | .....            |                |
| HBV DNA Load log10<br>(IU/mL)         | 5.03(1.36-9.2)              | .....            |                |
| hsa-miR-30e-5p<br>(fold change/U6)    | 18.2(0.63-269.12)           | 1.01(0.712-1.92) | 0.0023***      |

Data expressed as median (range); CHB (Chronic Hepatitis B); AST (aspartate transaminase); ALT (alanine transaminase); HBsAg (Hepatitis B surface Antigen); Anti-HBcIgM (IgM antibody to hepatitis B core antigen); HBeAg (Hepatitis B e-Antigen); hsa-miR-30e-5p (Human Micro(mi)-RNA-30e).

Table 2

## Down Regulated genes

|              |            |            |            |            |              |            |            |
|--------------|------------|------------|------------|------------|--------------|------------|------------|
| NBPF19       | CYP4F11    | DIABLO     | TWF1       | UPK1B      | NT5E         | HDAC5      | AXIN2      |
| ALPL         | PRR5L      | HOXB8      | AC027698.1 | LINC00707  | PRRG1        | SLC38A6    | RARS2      |
| OR2B6        | CD99       | SEMA3E     | ST3GAL5    | SNX29      | STC2         | CD9        | SPOCK3     |
| DLEU1        | TBPL1      | PADI3      | HOXB8      | PTPRH      | PTGFRN       | AC130456.3 | STEAP1     |
| LNPBK        | COPZ2      | AC092608.1 | MEX3B      | GOLGA7B    | AC084871.1   | C9orf72    | RAB32      |
| ZDHHC8P1     | GM2A       | GALNT9     | TMEM158    | AP4B1      | AC106820.5   | NT5E       | F8         |
| BORCS7-ASMT  | FOXD3      | AC093677.2 | UPK1B      | FAM110B    | P4HA2        | SLC5A4-AS1 | MIR210HG   |
| FBXO48       | AVEN       | GNG10      | C12orf66   | TSEN15     | SLC19A3      | CREG1      | TMEM87B    |
| TM6SF2       | WNT7B      | ZDHHC20    | TCP11L2    | ACSL1      | NEIL2        | MORN4      | TMED10     |
| CLEC2D       | AC243964.2 | TRAPPC2    | AP4B1-AS1  | TSEN15     | VPS26B       | STK39      | EVA1A      |
| LRRC27       | TWF1P1     | CPT1C      | CDK5R2     | AC016042.1 | ST3GAL5      | AC072022.1 | B4GALT5    |
| CORO2A       | PDIK1L     | RTN4R      | ACVRL1     | PADI2      | AC008537.2   | PORCN      | NEIL2      |
| IDH1         | AC005606.2 | WISP2      | CRTAC1     | AC005726.4 | SLC6A6       | RNA5SP39   | TMCO3      |
| AL390879.1   | FAM81A     | GALNT7     | LPXN       | ZFP90      | ABHD6        | CREG1      | SMIM20     |
| AC021733.1   | JAK3       | SMPDL3A    | PPP1R18    | KCNC3      | APLP1        | GFOD1      | NEU1       |
| MAP3K7CL     | RTN4R      | HMGB2      | SFXN3      | TMEM156    | ABHD14B      | AL445483.1 | NAGPA      |
| PAX6         | HERC2P4    | DHRS2      | ACHE       | AC027097.1 | MAP1LC3B     | BCHE       | SEL1L3     |
| ATP6V0E2-AS1 | TTC21A     | AC138466.4 | UPRT       | STAG1      | AL136084.2   | ATP6V1B2   | CFDP1      |
| PCBD2        | AC099489.1 | DUSP28     | EXOC4      | RNU6-527P  | ARID5B       | FADS2      | CAMK2N1    |
| EFCAB13      | SNAI3-AS1  | ADAT1      | AC010655.4 | CKAP4      | KLHL20       | SCARA5     | CD70       |
| STX3         | KIAA2012   | GATA2      | FUCA1      | ATP8B1     | AC011120.1   | DESI2      | TFAP4      |
| IDH1         | CTHRC1     | MALL       | VIM        | S100A2     | FRRS1        | AL049780.2 | SEMA3F     |
| BX088651.4   | UGT2B26P   | PPIL3      | AC008676.3 | FOXD1      | B4GALT4-AS1  | PSMD10     | TNFSF13B   |
| SH3PXD2A     | FO393400.1 | LNPBK      | RARG       | RUNX2      | ENO2         | REEP2      | NIPAL4     |
| PPFIA4       | GNAI2      | SAR1AP2    | FTH1P8     | B3GNT5     | AC093388.1   | C17orf75   | ABCA7      |
| ASTE1        | PIP4K2A    | ARID5B     | MALL       | PHOSPHO1   | RNU6-1333P   | ADAM19     | TFPI       |
| ACKR3        | SEC23A-AS1 | VAV3       | AC007790.1 | TIMP2      | VWA8         | RF00019    | LPIN1      |
| MYO15B       | SFRP5      | LMBR1L     | TWF1       | NPC1       | CCNF         | METTL2B    | FOXD1-AS1  |
| AC097467.3   | NOV        | ZNF34      | CTH        | UAP1L1     | C11orf45     | B3GNT5     | CD70       |
| METTL8       | CCDC184    | FBXO32     | TTLL12     | AC007319.1 | TRAF3IP2-AS1 | SPP1       | MINPP1     |
| B3GALT4      | LRRK2      | ALDOC      | MPHOSPH6   | BNIP3L     | STX7         | UBE2V2     | AC116634.1 |
| NBPF19       | AC132872.1 | CAPS2      | SLC20A1    | CEACAM6    | RAB32        | AL121929.2 | PPP1R18    |
| PIGC         | C3orf18    | SAP30      | FUCA1      | P4HA2-AS1  | PTGES        | RNA5SP118  | UAP1L1     |
| NIPAL2       | ACACA      | CAPN5      | GSTM4      | AC243967.2 | PIK3IP1-AS1  | GALNT1     | ABCG2      |
| ZNF77        | GNAI2      | ITPK1-AS1  | NTNG2      | RNA5SP55   | E2F7         | IGFL4      | DSG2       |
| PRDM13       | WNT7B      | MID2       | TRIB3      | SEC22C     | CRCP         | RN7SL798P  | ABCG2      |
| CNTNAP3C     | SEC23A     | CDKN2D     | GNPDA1     | STK39      | AC106801.1   | LSS        | LYN        |
| TNFSF12      | GGT8P      | AC092570.1 | AC099489.1 | RASGEF1A   | ABCA5        | ABCA17P    | ARPC5      |
| GM2A         | AP3S1      | PADI2      | ENDOD1     | TMEM205    | AC002996.1   | ALG1       | PQLC3      |
| MMP16        | TWF1P1     | RARG       | AC100788.1 | TTLL7      | BEGAIN       | ENO2       | ANKRD29    |
| AC107373.2   | RGS11      | MMP23A     | TMEM59L    | DLK2       | RMC1         | DGKA       | EIF4EP1    |
| MLIP         | TMEM59L    | HSD17B7    | RRAD       | TMEM156    | AL357673.1   | HILPDA     | BAIAP2-DT  |
| THCAT158     | SLC35C1    | CAPN5      | TBC1D2     | TRIB3      | AP2A1        | PTPN13     | ANXA10     |
| CD99         | AC069113.2 | VGFB       | DNAJC25    | KLK10      | FBXO45       | SPP1       | RAB7A      |
| SETDB2       | PIP4K2A    | SLC35C1    | TEX2       | LCLAT1     | IRAK4        | DBF4       | MRPL46     |
| ADAM12       | NEFL       | ITPK1      | RTN2       | CAMKK1     | CPLANE2      | GSDME      | CA12       |
| SFRP5        | SCML1      | AMPD3      | F12        | ATP8B2     | STX4         | SLC35D1    | MTDH       |
| SYNGR3       | AC098582.1 | AL360081.1 | SLC20A1    | LRRC75B    | ATP8B2       | RAD23B     | DPY19L1    |
| RRAD         | PPP2R5B    | VIM-AS1    | RN7SL462P  | CAMKK1     | RHEBL1       | SOGA1      | SOGA1      |
| GDPD5        | MINCR      | AC007406.4 | SDAD1P1    | TMEM158    | ATP6V1B2     | RAD23B     | HYAL3      |
| SPATC1L      | AP3S1      | GNPDA1     | B4GALNT4   | ENDOD1     | CYFIP2       | TMEM231    | PDP2       |

Table 2. Continued

|            |            |            |             |            |            |              |            |
|------------|------------|------------|-------------|------------|------------|--------------|------------|
| CLIP2      | UBAC1      | PLPPR2     | HK1         | SPINT1     | NINJ2      | AP000487.1   | MST1L      |
| ELF3       | WDR54      | LDHAP4     | DHCR7       | STK31      | PAFAH1B3   | ATRNL1       | NRG1       |
| JCAD       | NEU1       | ACVR1      | RAP2B       | STXBP1     | PTGR1      | ATRNL1       | PARD6G-AS1 |
| FAM162A    | AC027682.5 | AC010531.3 | JMJD1C      | TRIM69     | SAP30L-AS1 | C3orf20      | PRKCH      |
| CNTN1      | UPRT       | SERINC3    | AC020907.6  | TRPV3      | SPAG4      | CRISPLD2     | PROSER3    |
| SLC6A15    | TM4SF1     | ARPC5      | AOC2        | ENPEP      | AK3        | DICER1-AS1   | PRRT2      |
| GABRA5     | RF00019    | ITGB3BP    | CERKL       | GPR135     | CC2D1B     | GPLD1        | RAB30-AS1  |
| DPY19L1    | AL163636.1 | PFKFB4     | MYH7B       | MSC-AS1    | FAM95C     | GRASP        | RAB40A     |
| GPI        | PGM1       | NSMAF      | FAM129A     | PRKAR2B    | LINC00539  | LINC01091    | RAD51B     |
| SLC8B1     | MARK2P8    | VAMP3      | PLA2R1      | RRN3P2     | MAP7D2     | MPRIP        | RBM4       |
| HK2        | HAGH       | AL031714.1 | ARFGF3      | ZNF574     | SLC9B2     | SLIT3        | RN7SL644P  |
| GLI2       | AC079203.2 | LAMA3      | IGDCC4      | ARHGEF26   | ZFHX3      | STIM1        | SORCS2     |
| PHOSPHO1   | TLCD2      | AC005253.1 | RAB30-AS1   | AC131097.3 | AC006486.1 | TBX19        | SPDYE18    |
| STXBP5-AS1 | RPA2       | INSIG2     | AC058822.1  | ACBD5      | AC068234.1 | TPCN2        | STXBP5-AS1 |
| FUZ        | TLL12      | KCNAB2     | PTPRCAP     | ENSA       | AC133552.2 | ZBED5        | TLN2       |
| ESCO1      | CNTN1      | OLFML2A    | RAD51B      | GPR135     | AC242426.2 | ZNF511-PRAP1 | TXK        |
| NCAPH      | MYDGF      | AC090541.1 | MCOLN3      | LINC02585  | ALS2CL     | ZNF708       | URGCP-     |
| YWHAZ      | FAM102A    | CDCA2      | STXBP1      | MAPK6-DT   | ARHGEF6    | ZNF800       | MRPS24     |
| SNX30      | GJA1       | TM4SF1-AS1 | IFNA1       | PDE11A     | C17orf75   | AC007000.3   | ZBTB7C     |
| BMP6       | OGFRL1     | AC010260.1 | ERMP1       | PHKG1      | C1QTNF6    | AC007318.2   | ZFPM2-AS1  |
| DSG2-AS1   | CAT        | IRF2BP2    | SERPINE3    | ZAN        | DCHS1      | AC007785.1   | ARHGAP23P1 |
| VAMP3      | CDCA2      | AL160408.2 | TMC5        | RNH1       | FAM86HP    | AC008663.2   | MIR100HG   |
| DLG4       | TMEM170A   | AC027319.1 | HIVEP2      | VPS25      | INSL3      | AC011481.1   | SLC16A8    |
| CSTB       | TMEM106B   | GLYCTK-AS1 | VILL        | CDH23      | KATNBL1    | AC015687.1   | SLC5A11    |
| B4GALT5    | HMOX1      | SPOCK1     | DLEU2       | RAB3B      | KLHL30     | AC040174.1   | SNX24      |
| ELF3       | AL354740.1 | CARS-AS1   | PLEKHM3     | SPRED3     | KPNA7      | AC0040174.1  | AC003002.1 |
| AP4E1      | SPAST      | FTH1P7     | GREB1L      | SPTBN4     | MED12      | ADAMTS6      | ACAD9      |
| SYT5       | LIMA1      | AL445488.1 | POLN        | AC022893.1 | MIATNB     | ANKRD24      | ADAMTS14   |
| PTGES      | MBNL1      | CCDC97     | ZNF678      | AC139149.1 | MUC6       | APIP         | AL683807.2 |
| STXBP1     | CBX2       | CBFB       | CEMIP       | ANKRD34A   | PELI2      | ARMH3        | BAIAP3     |
| TRAPPC9    | GSKIP      | KNSTRN     | AC026464.1  | CATSPER3   | PRCC       | ATF3         | C2         |
| HK1        | FER1L4     | SUCLG2-AS1 | ERV3-1      | LGI3       | SGSM1      | BACH1        | CCDC88B    |
| LINC00472  | UCP2       | HMOX1      | ISM2        | RCOR2      | STAR7-AS1  | BACH1-IT1    | CD55       |
| KDELC2     | STEAP1     | ZNRF1      | ITFG2       | TTN        | STXBP1     | CAPN12       | CDH16      |
| GJA1       | KXD1       | PLBD2      | TET1        | TANK       | TRIOBP     | CTR9         | CMPK2      |
| AMZ2       | WDR82      | KRIT1      | MORC4       | AC138150.1 | ZDHHC8P1   | CYP2F1       | DLEU1      |
| SLC6A15    | TLE1       | GNA13      | RNF187      | LRRFIP2    | ZNF346     | DNHD1        | DYRK4      |
| AC113386.1 | TRAF3IP2   | DLGAP5     | SNAP25-AS1  | APOBEC3A   | ZNF398     | DYNLRB2      | EIF1B-AS1  |
| NDEL1      | AL845552.2 | SERINC5    | EFCAB13     | AC073107.1 | ZNF503     | EFCAB13      | EXOG       |
| YWHAZ      | AC037487.2 | KLF13      | SPG7        | AC244230.2 | AC009690.1 | ELK4         | FRMD8      |
| AGFG2      | CBFB       | NPTXR      | TRIM13      | IDH3A      | CACNA1A    | FRMPD2B      | FRMPD2B    |
| STXBP5     | KCNAB2     | AP001469.1 | AC087482.1  | KREMEN2    | DUBR       | GREB1L       | GATD1      |
| PPP3CA     | DHRS3      | XPR1       | AC106869.1  | MIRLET7BHG | ENSA       | HACD4        | HS1BP3     |
| HR         | RPA2       | RRM2       | BORCS7-ASMT | ZDHHC8P1   | RAB27A     | HOXB-AS4     | IKZF4      |
| TK2        | ABCA3      | MTDH       | CA14        | ABCA5      | SAP30L-AS1 | KCNAB1       | KANSL1L    |
| DYRK4      | CD82       | UCP2       | CATSPERG    | AC009690.1 | TPCN2      | KNDC1        | LCA5       |
| B4GALT4    | HKDC1      | EDEM2      | CEP72       | AL032819.3 | VPS53      | LMO3         | LINC00680  |
| ITGA2      | KATNB1     | GTSE1      | KIAA2026    | ANKRD24    | AC007773.1 | LRRC8C-DT    | LINC02532  |
| C3orf58    | SAT2       | TRIM38     | LINC01521   | CLDN18     | AC137936.1 | MAP1A        | LMNA       |
| MINPP1     | HR         | SIGMAR1    | PRUNE2      | GNGT1      | AMPD3      | MED6         | MIR222HG   |
| PLIN3      | PLPPR2     | CAT        | SALL4       | LRMDA      | AP000487.1 | MIR29B2CHG   | MYO1D      |
|            |            |            |             |            |            | MIRLET7BHG   | NALCN      |

Table 2. Continued

|            |            |            |           |            |             |             |             |
|------------|------------|------------|-----------|------------|-------------|-------------|-------------|
| NFATC2     | ZBTB20-AS5 | AC009133.2 | DNAJA3    | PRB1       | ZNF674      | DSCAML1     | SLC4A3      |
| POLR2J4    | AC009065.4 | AC009404.1 | DNM1P47   | PSMB5      | ZNF718      | EPHX3       | SLCO1B3     |
| PTOV1-AS1  | AC025048.4 | AC009690.1 | DOP1A     | PUM3       | AC011466.1  | FGF12       | SNHG28      |
| PXDNL      | AC104389.4 | AC009690.2 | DPY19L1P1 | PYCR3      | AC073569.2  | GGA3        | TRIM66      |
| RAB3GAP1   | AC145285.3 | AC021660.3 | DPY19L2P2 | RAD51B     | AC124944.3  | GLRA3       | ZNF620      |
| RAD51B     | ADAMTS14   | AC026412.3 | DRAM1     | RAD9A      | AC138150.1  | G RTP1      | CPLX2       |
| RBM45      | ADRA1D     | AC068205.2 | ENSA      | RALGAPA2   | AL391684.1  | INSL6       | RPL39P40    |
| RCOR2      | AK9        | AC068533.4 | EXD3      | RBFOX3     | BCL2L13     | KCNIP2      | MFSD2A      |
| RCOR3      | AL049629.1 | AC079447.1 | EXO1      | RDH16      | CCDC162P    | KIF9        | LSMEM1      |
| RIF1       | APLF       | AC079781.5 | FAM45A    | RETREG1    | COA5        | KIF9-AS1    | AL356489.2  |
| RMI2       | ATF3       | AC091045.1 | FAXDC2    | RFX3-AS1   | DACT3-AS1   | L3MBTL4     | GNG13       |
| RPH3A      | BMPER      | AC099508.2 | FAXDC2    | RNF224     | DDX50P2     | LINC02381   | HOXB7       |
| SPDYA      | CAPN12     | AC114956.1 | FBXO43    | RNF4       | EPHA5       | LSAMP-AS1   | HOXC5       |
| SPESP1     | CEMIP      | AC245297.1 | FSD1L     | RPS23P1    | FBXO9       | MAGI1       | DBP         |
| THCAT158   | CISD1      | ACTG1      | FTX       | RSPH9      | FCF1        | MAP3K8      | AC012531.2  |
| TSEN2      | CLBA1      | AL031599.1 | GAS2      | RSRP1      | LGR6        | MEG9        | AC099489.1  |
| AC007388.1 | CR381670.1 | AL117190.1 | GIPC3     | SCN8A      | LINC01534   | MIR4500HG   | AC007906.2  |
| AC011921.1 | ELANE      | AL121820.1 | GUCY1B2   | SCNN1D     | LINC02048   | MTHFD2L     | AC026471.4  |
| AC120114.1 | EPHA5      | AL139289.2 | H1FX-AS1  | SDK2       | MAGI1       | MZT1P2      | CGN         |
| AL121776.1 | H2AFJ      | AL157882.1 | HAGH      | SDK2       | NNT-AS1     | OTUD3       | IQCH-AS1    |
| AL133410.1 | HAND2-AS1  | AL450992.1 | HCG27     | SGCE       | TAX1BP3     | PATL2       | NALCN       |
| AL138752.2 | HOXB7      | AL592078.1 | IFRD1     | SGK3       | PDZD4       | PPWD1       | SLC9C2      |
| AL355303.1 | IL1B       | AL603839.3 | ITGAD     | SLC13A3    | SLC6A8      | RB1CC1      | RF00019     |
| AL512353.2 | ITGB3BP    | ALS2CL     | KIAA1755  | SLMAP      | TCF12       | RBMS3       | HELLS       |
| ASB4       | KCNIP2     | ANKRD36    | KIF26A    | SNAP25-AS1 | TOMM20L     | RHOXF1-AS1  | AL353692.1  |
| BACE2      | LINC01376  | ARHGAP22   | KNDC1     | SPATA17    | AC007786.1  | RNF20       | C3orf20     |
| C1orf54    | MAP1A      | ARMCX4     | LAMA2     | SPNS2      | AC008267.3  | RPS27L      | HELLS       |
| COL17A1    | MED12L     | BACH1      | LCA5      | SPRY4-AS1  | AC009041.1  | SERINC5     | POLR1B      |
| CR392039.3 | MSS51      | BCAR3      | LEKR1     | SUCLG2-AS1 | AC055713.1  | SLC16A1-AS1 | SMOX        |
| CYP4F11    | MYO16      | BTBD8      | LINC00470 | SUMO2      | AC068707.2  | SLC2A1      | AC099489.1  |
| CYP4F25P   | RAB30      | C5orf66    | LINC00618 | TAPT1-AS1  | AC078881.1  | SLC35F3     | FRMPD2B     |
| DNAH17     | SAP30L-AS1 | CAPRIN1    | LINC01348 | TBC1D25    | AC078927.1  | SPON2       | AC013470.2  |
| DRD4       | SLC37A3    | CCDC103    | LIPE-AS1  | TBC1D7     | ADAMTSL3    | SRFBP1      | TSC22D1-AS1 |
| FAM19A5    | STXBP1     | CCDC150    | LRMDA     | TLN2       | AL137145.2  | TSPO        | LRR6P1      |
| ITGA1      | TEX52      | CCDC191    | LRMDA     | TMEM65     | AL137247.1  | TSSK3       | SERINC3     |
| LINC01305  | TFCP2L1    | CCDC7      | MCMBP     | TMTC1      | AL590666.1  | ZNF518B     | AC108062.1  |
| LINC01347  | TNN        | CD55       | MIATNB    | TPTE2P5    | ANKRD20A21P | ZNF529      | RF00003     |
| LINC01572  | TPI1P2     | CD55       | MRPL23    | TRIB2      | AP002992.1  | ZNF570      | SOCS3       |
| MAST4      | TPTE2P5    | CD55       | MRPL37    | TRIM23     | ATE1-AS1    | BECN1       |             |
| MEG9       | ATG5       | CEP162     | MSANTD4   | TTC28      | ATXN3       | AP001767.3  |             |
| NFAT5      | ATG12      | CES4A      | MSANTD4   | EPG5       | BNC2        | ARAP2       | TREX2       |
| PIGZ       | WDR78      | CHMP7      | MSC-AS1   | UBE2Q2P1   | BZW1        | CAPS2       | ULK4P1      |
| PLK3       | Z84485.1   | CMSS1      | MUC13     | UCP3       | C2orf48     | CBLB        | AL355303.1  |
| PTPN2      | ZNF767P    | CNKSR2     | NAA15     | WDR66      | C9orf43     | ELL3        | TXNRD3      |
| RAB30-AS1  | ABCA12     | CRYGS      | NMUR1     | WDR82      | CAB39L      | FBN2        |             |
| SLC25A41   | AC005020.2 | CSNK1D     | NPSR1-AS1 | WDR86-AS1  | CACNA1B     | GOLGA6L10   |             |
| SPACA6P-AS | AC006001.3 | DENND3     | PALLD     | WNT2B      | CCDC174     | LINC00174   |             |
| SUCLG2-AS1 | AC007000.3 | DENND4A    | PAX8-AS1  | ZDHHC8P1   | CLCN6       | MAP3K13     |             |
| TLR1       | AC007220.1 | DGKH       | PDE4D     | ZNF239     | COPS2       | RAB27A      |             |
| UBE2Q2P1   | AC007406.3 | DHX15      | PDE5A     | ZNF483     | CYB5B       | RABGAP1L    |             |
| Z94721.1   | AC008397.2 | DNAH14     | PLCG1-AS1 | ZNF596     | DLEU2       | SGPP2       |             |

Table 2. Continued

| Up-regulated genes |            |            |            |            |             |            |           |
|--------------------|------------|------------|------------|------------|-------------|------------|-----------|
| BRD9               | POLR3A     | AC027808.1 | ZNF699     | PKLR       | TGS1        | ZNRF2P2    | CCDC91    |
| TSPAN12            | SCUBE2     | AC114490.3 | ADARB1     | PRDM2      | TMSB15B-AS1 | HRASLS2    | CD5L      |
| CCNY               | TBX18      | AC114947.1 | CEL        | SCAF11     | ZBTB20      | TNF        | CDHR3     |
| CHMP6              | TTC28      | ADGRL2     | COX10-AS1  | SORBS1     | ZBTB37      | IFNA13     | CDYL2     |
| BAG1               | WDR41      | ANK1       | ITGB1-DT   | STK11      | ZFAND4      | AC007240.1 | CEP152    |
| EDIL3              | ADGRB1     | ARF1       | LRP2BP     | VAR52      | ZKSCAN2     | AC012651.1 | CEP57L1   |
| TTC33              | ASH2L      | ARNTL2-AS1 | PARP10     | WDR82      | ZNF518A     | AC016205.1 | CGNL1     |
| ATAD5              | LINC00982  | ATP2A1     | PDZD4      | ZNF391     | ZNF800      | AC027288.1 | COBL      |
| ULK4               | LINC01232  | CARD8      | PHKG1      | ZNF586     | ZNF850      | AC044860.1 | CROCC     |
| WDR60              | RNU6-1310P | CC2D1B     | TAB2       | ZNF883     | ZNF43       | AC064871.1 | DLEC1     |
| BRINP1             | SDK1       | CCNC       | TFPI       | ZSWIM7     | BNIP3P27    | AC068533.3 | DLEU2     |
| SPON1              | AC078927.1 | CEMIP      | AL365273.2 | ABHD18     | AC124319.2  | AC091551.1 | DNAH1     |
| RAB30              | AC110769.2 | DPY19L2P2  | AL512428.1 | ABHD5      | KBTBD11-OT1 | AC098864.1 | DUBR      |
| AP000808.1         | ANKRD44    | ENO4       | AP000808.1 | AC007388.1 | SORCS2      | AC106795.3 | EML5      |
| PDE6G              | C5orf66    | FAM166A    | C12orf60   | AC011726.1 | ZNHIT6      | AC116609.2 | ENSA      |
| AC091551.1         | FGF7P3     | FLRT2      | CASC2      | AC013652.1 | AC021180.1  | AC132153.1 | ENTPD1    |
| AC245748.2         | GTF2IP12   | GPATCH2L   | CCR7       | AC114781.2 | AC053527.1  | ADAMTS1    | EVI5      |
| PKD1L2             | LINC01237  | GUCY2EP    | EFCAB13    | AIPL1      | AC073254.1  | ADAMTS4    | EXOSC1    |
| PRR5-ARHGAP8       | MXD1       | IGDCC4     | EXOC3L1    | AL590560.1 | AC093734.1  | ADAMTS7    | FAM173B   |
| RANBP17            | PCAT1      | KCNIP2     | GLI3       | AL592295.3 | AC233280.2  | AGBL5      | FCN3      |
| VOPP1              | STX18-AS1  | LINC01322  | LARP1B     | AP000640.2 | AL035413.1  | AKR1B1     | FGF19     |
| ZNF248             | TBC1D7     | LMBRD2     | MMP20      | BASP1      | IRF2        | AKR1C4     | FMNL3     |
| AC012441.1         | YTHDF3     | LRIG1      | PABPC1     | BCLAF3     | IFNL1       | AL023653.1 | GHRLOS    |
| GNAL               | ZBTB20     | MAJIN      | SRMS       | C1QTNF6    | AL592429.2  | AL121820.1 | GREB1L    |
| HERC2P5            | AC007000.3 | MEIS1      | TMTC1      | CDH4       | AL592431.1  | AL122010.1 | GRM4      |
| LINC01004          | AC013714.1 | MIR100HG   | TNXB       | CR392039.3 | ARHGEF4     | AL136038.4 | GZF1      |
| SLCO5A1            | AL117336.3 | MYLK2      | TPRG1      | SEC16B     | C1orf35     | AL136164.2 | HCG27     |
| BACH1              | AL442647.1 | NFIB       | WDR66      | DBNL       | C2orf48     | AL359915.2 | HIST1H3J  |
| AC245748.1         | AP003900.1 | NREP       | SECTM1     | GCKR       | CAPS2       | IFNA1      | HMCN1     |
| AP001462.1         | FAM155A    | POLK       | IFIH1      | HAGH       | CCDC162P    | IFIT1      | HOXD10    |
| CCR7               | IFT22      | PSMF1      | P2RY6      | HDAC9      | CHMP6       | LY6E       | HPRT1     |
| LINC00470          | PKP2       | PTDSS2     | IL6        | IL31RA     | CHRM3       | ALDOA      | HSF2BP    |
| ZNF549             | RABIF      | RBFOX3     | IRF3       | KLF3-AS1   | CLDN10      | ALG1L6P    | ICA1L     |
| AC083837.2         | SEMA3D     | SDCBP2     | AP002373.1 | LCA5       | CYP2U1      | ANKRD26    | ICAM5     |
| AL136164.2         | TMEM266    | SEC31B     | CCDC32     | LRP2       | FAM189A1    | ANKRD36    | INTS6-AS1 |
| CACNA1D            | TTC39C     | SLC22A11   | CEMIP      | LUCAT1     | GHITM       | ANKRD55    | ISLR      |
| MIR137HG           | ZNF883     | SLC35F3    | CLEC4A     | MEFV       | HS6ST2      | ANO4       | ITGAD     |
| RBM43              | AC026785.3 | SLCO4C1    | EOMES      | NPRL3      | INTS6-AS1   | AP4S1      | ITGB3     |
| SLC2A1             | AC005943.1 | SPRY3      | FAM57A     | NSL1       | KCNT2       | ATP6AP1L   | KANTR     |
| RAB3B              | MGAT3      | STARD9     | FNDC5      | PRKG1      | LINC00824   | ATXN3      | KCNV2     |
| ABCB7              | NOSIP      | TENM4      | GIPC2      | RGMA       | LINC01359   | BACH1      | KIAA1109  |
| AC097634.4         | TRIM36     | TEX52      | GPLD1      | RNF4       | LINC02202   | BEST3      | KIF9      |
| AC104447.1         | TRIM5      | TTYH1      | GUCY1B2    | ROPN1L     | PSMB2       | C17orf75   | KRBOX4    |
| CCDC153            | AP001783.1 | UNC5D      | HRAT92     | SDR16C5    | RNF224      | C1QTNF3    | LHX4      |
| CYP4F26P           | HOXB-AS4   | UNC79      | KCNH1      | SGK3       | SLC4A2      | CARD8      | LINC00511 |
| DPF2               | SDCBP2-AS1 | IFNA8      | KDM4D      | SMUG1      | SNHG14      | CARD9      | LINC00910 |
| ELFN2              | SNHG14     | IRF1       | KRTAP5-AS1 | SNX24      | SNX8        | CARD9      | LIPE      |
| ENPEP              | LINC00641  | ZFPM2-AS1  | LRRRC69    | SPECC1P1   | TEX19       | CATSPER3   | LRRRC32   |
| ING5               | AC006001.3 | ZNF131     | MIR29B2CHG | SPEF2      | TRDMT1      | CCDC181    | LRRRC56   |
| KLF15              | AC009061.2 | ZNF565     | PKD1L2     | TBX18      | WNK2        | CCDC91     | LTC4S     |

Table 2. Continued

|            |            |            |                  |             |            |             |            |
|------------|------------|------------|------------------|-------------|------------|-------------|------------|
| LY96       | SMIM8      | AC090539.1 | INTS6-AS1        | ZNF704      | C1GALT1C1L | ANKRD1      | PLSCR4     |
| MAP1A      | SRMS       | AC108062.1 | JMJD6            | ZNF706      | DAAM1      | CCDC28B     | GYG2       |
| MAPK10     | SRP14-AS1  | AC112722.1 | KIAA0825         | ZNF718      | GABBR1     | DIO2        | UBB        |
| MCMBP      | STARD9     | AC136475.5 | KIF1C            | AC090061.1  | ZNRF2P2    | RNU6-8      | HMGA2      |
| MED12L     | STK3       | ADAMTS20   | KLF13            | AC244230.2  | NCALD      | IRF8        | VANGL2     |
| MEP1B      | STK33      | AF121898.1 | KRBA1            | BTN2A3P     | SEMA7A     | ADCY1       | TNFSF15    |
| MFSD2B     | SUCLA2     | AFG3L1P    | LINC00240        | CYP4F26P    | EVI5L      | LINC02081   | E2F2       |
| MIR137HG   | TCF12      | AL109936.6 | LINC00858        | DDC         | LINC00630  | SNRPF4      | DHRS11     |
| MIR222HG   | TET1       | AL135937.1 | LINC02381        | GPR78       | LARP1B     | SYNGR4      | CXCL10     |
| MIR34AHG   | TFCP2L1    | AP000721.1 | LPAL2            | INSL6       | PCAT19     | SNCG        | IGFBPL1    |
| MIS18A-AS1 | TMEM164    | AP003049.2 | MAP3K15          | KNDC1       | SERPINA3   | FAM171A2    | AC005544.1 |
| MLANA      | TMEM266    | ARHGAP22   | MGC32805         | LINC01004   | OR211P     | MMS22L      | AQP3       |
| MRAP       | TPTE2P5    | ARR3       | MIRLET7BHG       | SLC27A4     | RN7SL5P    | SDS         | MYLK-AS1   |
| MRNIP      | TRIOBP     | ASPDH      | MTBP             | FTLP2       | RPL7AP6    | CYR61       | CHSY3      |
| MROH2A     | TRIOBP     | ATF6B      | MYO15B           | VIM         | HBQ1       | TMEM150C    | ZNF138     |
| MYO1F      | TSG101     | ATL1       | NALCN            | AC026785.3  | ATAT1      | DTX4        | APOH       |
| NOL6       | TTC28      | ATRNL1     | NEMP1            | DNM1P35     | FABP6      | PDGFB       | C5         |
| NPC1L1     | TTC36      | AZU1       | NRG1             | GGA2        | AC074138.1 | NAT8        | ZNF280D    |
| OSBPL10    | UBE2F-SCLY | BMP7       | NRG1             | BANK1       | AC110285.1 | AUNIP       | SPINK4     |
| PCAT1      | USP6       | C3orf38    | PELI2            | ATL1        | LINC01322  | NAT8        | ZNF92      |
| PCBD2      | VAV1       | CCNT2-AS1  | PPA1             | STX18-AS1   | ZNF658B    | AMBP        | F2RL2      |
| PDE5A      | VOPP1      | CD55       | PRR5-<br>ARHGAP8 | AC084262.2  | PLIN1      | HEATR5B     | ADCY9      |
| PELI2      | WDR88      | CFAP52     | PRR5-<br>ARHGAP8 | ATL1        | C2orf70    | OLFM2       | C3orf52    |
| PIGQ       | WSB1       | CHAF1B     | PRSS36           | GGA2        | AC068533.3 | AC090673.1  | NKX3-2     |
| PIK3C2A    | ZBTB20     | CLDN14     | PSMD6-AS2        | AL157871.3  | NINJ2      | CDC25A      | IRF8       |
| PLOD2      | ZC3H12D    | COLEC11    | PTPRN2           | TRIM66      | TFF1       | CYP26B1     | IFNB1      |
| PMFBP1     | ZFP37      | COX7A2L    | RBM26-AS1        | PDE6G       | OTULINL    | C2CD2       | CYP1B1     |
| PPCS       | ZNF131     | CYP27C1    | RIPOR3           | BANK1       | TNFRSF1B   | IL12A       | ZDHHC23    |
| PPFIA4     | ZNF3       | DNAH14     | RIPOR3           | MYO1F       | TSPAN2     | CLDN2       | GATA3      |
| PPM1L      | ZNF397     | DPY19L2P2  | SETD7            | EXOC8       | TFF1       | ICK         | BIN1       |
| PPP1CA     | ZNF718     | DRG1       | SETD7            | PDGFRA      | PARP8      | ANKRD46     | TESC       |
| PPP2CB     | ZNRF2P2    | ELMO2      | SNHG5            | MYO1F       | AL353743.1 | DMRTA2      | WTIP       |
| PREP       | AC007128.1 | ENSA       | SPACA6P-AS       | DPYSL4      | INTU       | RPL7AP10    | RTKN2      |
| PSMA4      | CCDC136    | ENTPD8     | STAG3L4          | ALMS1P1     | SYNGR4     | TNK2        | ERFE       |
| RAB30      | MED19      | FAM155A    | SYCP2L           | SDHAF2      | AC055764.1 | FAM222A-AS1 | NACA       |
| RAPGEF4    | PHYHIP     | FAM21EP    | TBC1D8           | DGCR9       | LINC01273  | CLDN2       | AC007608.1 |
| RBM4       | WDR18      | FAM83E     | TBL1X            | ALDH1L1-AS1 | OLFM2      | F2          | TESC       |
| RGS20      | AC004865.2 | FGFR3      | TIA1             | DOCK7       | IL11       | MTTP        | KRT80      |
| RUFY4      | AC009301.1 | FKRP       | TLR1             | U2AF1L5     | ISM1       | REL         | HYAL4      |
| RUNDC3A    | AC010754.1 | FLVCR1-DT  | TMEM139          | EIF3CL      | LTB        | LINC01836   | SLC35G1    |
| SAP30L-AS1 | AC012651.1 | GNAL       | TMEM52           | U2AF1L5     | NEK10      | GYG2        | PKD1L2     |
| SCGB2B2    | CXCL10     | GPATCH2L   | TRABD2B          | AC138894.3  | PPIAP31    | ZNF273      | FAM222A    |
| SELENOS    | RSAD2      | GPR20      | VPS54            | ZNF268      | SMOC1      | CMTM8       | PDCD1LG2   |
| SETBP1     | AC025164.1 | GREB1      | WBP2NL           | CU633967.1  | CKMT2-AS1  | MPP2        | LYPD3      |
| SETD7      | AC026803.2 | GRIN2C     | WDR86            | SEMA7A      | CD74       | KRT80       | ARID3B     |
| SETD7      | AC058822.1 | GRTP1      | ZNF136           | BCL2L14     | CD83       | NEXN        | AL031590.1 |
| SHANK2     | AC068305.2 | HPS5       | ZNF331           | ZBED9       | RASSF5     | CXCL10      | CISH       |
| SLC25A53   | AC068389.1 | IDI2-AS1   | ZNF586           | CD74        | PARD6G     | RPL34P18    | RIC3       |
| SLC44A5    | AC079447.1 | IL31RA     | ZNF616           | C17orf75    | AQP1       | AKNA        | SGK1       |
| SLC49A3    | AC080013.1 | INTS4P2    | ZNF620           | CD22        | SMOC1      | U62317.1    | NAV2       |



Table 2. Continued

|            |             |                 |            |            |             |            |            |
|------------|-------------|-----------------|------------|------------|-------------|------------|------------|
| PLIN1      | ASS1        | DGCR6L          | IL32       | RPL30      | LBR         | EHD1       | UHRF1      |
| ASMTL      | CTU1        | RPL18AP3        | PKMYT1     | ZFP36      | CTSO        | ASF1B      | ARL5B      |
| PTK7       | AL591767.2  | PNKD            | RND1       | KITLG      | RPL31P58    | NXN        | RARRES3    |
| CYR61      | HSPA2       | SLC19A2         | RHOA       | ZNF267     | MCM6        | PROSER2    | TTL4       |
| FUT10      | SMCO4       | AC106820.2      | IRF2BPL    | ZNF367     | DTL         | MGMT       | AP003721.1 |
| TNF        | ZBP1        | KCNJ15          | TCIM       | ANKRD52    | SNX4        | RPF2       | TSC22D2    |
| RASAL2     | ZBTB49      | CCDC88C         | TMEM160    | FOS        | AL133481.1  | OOEP       | SOCS5      |
| NR4A3      | PTHLH       | PHLDB1          | LBH        | AC078929.1 | SOWAHC      | IGF2BP1    | PNRC2      |
| AC137936.2 | ZC3HAV1L    | MSX1            | DDX39B     | CD274      | SIK1B       | SERPINB9   | MCM6       |
| FAM135A    | DANCR       | FGFR4           | MAMLD1     | EXO1       | RHOA        | AC124784.1 | FERMT2     |
| ZBTB47     | ZBTB34      | RF00100         | FGFR4      | AC034105.3 | DNPH1       | CYTH1      | CSRNP1     |
| PKDCC      | IGFBPL1     | COL7A1          | DNAH14     | AKNA       | COL6A2      | CXCL11     | AREG       |
| CEP135     | MIDN        | B3GNT7          | SHISAL1    | ZFP36      | FAM3C       | RPL21P23   | ARHGEF18   |
| DNAJC6     | IRF8        | FOSB            | AMER1      | AC007686.3 | LSM5        | SDF2L1     | AL109613.1 |
| EIF4EBP2   | GSDMB       | AC016739.1      | ELOA-AS1   | CD274      | IRGM        | KCTD11     | IFITM2     |
| FBLN5      | IRF7        | FBLN5           | AC009630.1 | NUAK2      | SNHG6       | ELF4       | TMEM184A   |
| TGFB2-AS1  | IFNL4       | RNF216P1        | HRASLS2    | MCRIP1     | SPRY4       | TRIB1      | ISG20      |
| MICB       | MAP3K14-AS1 | ZBTB47          | NR4A3      | RPL34      | AC068620.2  | GIN51      | IFIT5      |
| KCNF1      | NAPRT       | WDR76           | TNFRSF12A  | KMT5C      | CTU1        | ZBTB5      | MX1        |
| ZNF283     | ZNF235      | GATA3           | RBAK       | ETS1       | CLDN23      | RNU6ATAC9P |            |
| RNF38      | ACSL5       | VGLL3           | ODC1       | ZBTB5      | SCAMP5      | RAB5IF     | HCP5       |
| PARP8      | CRY2        | CX3CL1          | MICALL2    | MSX1       | GNGT1       | RPL21      | SP140      |
| AQP3       | WT1         | WEE1            | TUSC2      | AL163192.1 | SERPINB9    | LIAS       | GTPBP2     |
| KCNF1      | ISG15       | Z82188.2        | LIME1      | TMEM109    | MED28       | TRAPPC6A   | GLI3       |
| SDF2L1     | C11orf86    | RASSF8          | GNG4       | RPAP1      | ZNF274      | DUSP5      | ANKS1B     |
|            |             | IQCJ-SCHIP1-AS1 |            |            |             |            |            |
| ZNF428     | DUSP1       | AS1             | AC073130.2 | COL1A1     | SCARA3      | COL5A1     | XDH        |
| EIF4EBP2   | GEMIN2      | VASH2           | CLASP2     | TCIM       | ZNF274      | IFNAR2     | FAM106A    |
| AC117383.1 | GRAMD4      | IGFBP3          | SFRP1      | DUSP16     | RPSAP58     | RPS29P2    | IFIT2      |
| FO393422.1 | EFNA1       | Z84485.1        | AC016739.1 | EDRF1-AS1  | PROSER2-AS1 | IGF2BP2    | NEDD4      |
| TNFRSF1B   | C3orf52     | AMBP            | E2F1       | GADD45B    | AL365226.1  | HGSNAT     | KBTBD8     |
| P2RY6      | AC099560.2  | RPL27A          | AC091045.1 | PRR5       | TRAPPC6A    | YPEL2      | RGS22      |
| ZNF117     | ZNF92       | SRD5A1          | DICER1     | TUFT1      | ISOC1       | TUFT1      | TRIM69     |
| SMAD7      | SNHG8       | KCNC4           | RPL39      | ATF7IP     | SOCS2       | CXCL8      | FAM3C      |
| ELOVL2-AS1 | ODC1        | RPS7P10         | TGFB2      | MCM3       | BARD1       | CDC6       | PAK3       |
| RND1       | XKR8        | AL355032.1      | SCARA3     | C21orf91   | CCDC12      | ATL1       | SLC15A3    |
| AL139294.1 | PLPPR3      | MORF4L1P3       | BARX1      | CCNE1      | AC010618.3  | MAFB       |            |

Table T3

| Negative Regulator                                                          | hsa-miR-30e Binding site | miRanda           | DIANA      | Target Scan             | miRDB        |
|-----------------------------------------------------------------------------|--------------------------|-------------------|------------|-------------------------|--------------|
| <b>TLR pathway</b>                                                          |                          | miRSVR Score      | Pred.Score | Context++ Score         | Target Score |
| TRIM 38                                                                     | one site: 1157           | -1.0306           | ---        | -0.13                   | ---          |
| TANK                                                                        | one site: 238            | -1.0396           | ---        | -0.29(highly conserved) | ---          |
| TRIM 35 <sup>(37)</sup>                                                     | one site: 281            | -0.5210           | 0.756      | -0.07                   | ---          |
| <b>RIG/MDA5 pathway</b>                                                     |                          |                   |            |                         |              |
| ATG5                                                                        | one site at:511          | -1.2012           | ---        | -0.44(highly conserved) | 88           |
| ATG12                                                                       | two sites: 370, 388      | -1.029 & -0.4650  | Low score  | -0.39                   | 98           |
| TRIM 13 <sup>(38)</sup>                                                     | two sites: 2740,3856     | -0.1131 & -0.4454 | ---        | ---                     | 64           |
| TRIM 38                                                                     | one site: 1157           | -1.0306           | ---        | -0.13                   | ---          |
| SOCS1                                                                       | one site at:271          | -1.2111           | 1.000      | ---                     | 78           |
| SOCS3                                                                       | one site at:1411         | -1.2147           | 0.998      | ---                     | 85           |
| BECN1                                                                       | one site at:84           | -1.3155           | 0.863      | ---                     | 88           |
| <b>Inflammatory pathway/<br/>Virus Reserves or<br/>Reactivation pathway</b> |                          |                   |            |                         |              |
| EPG5 <sup>(39)</sup>                                                        | one site at:24           | -0.4449           | 0.984      | -0.25(highly conserved) | ---          |
| BECN 1                                                                      | one site at:84           | -1.3155           | 0.863      | ---                     | 88           |
| ATG5                                                                        | one site at:511          | -1.2012           | ---        | -0.44(highly conserved) | 88           |
| <b>DNA sensing pathway</b>                                                  |                          |                   |            |                         |              |
| BECN1                                                                       | one site at:84           | -1.3155           | 0.863      | ---                     | 88           |

## TRIM 38

- Gene ID:[ENSG00000112343](#)
- Gene Name: TRIM38
- RBP:[AGO2](#)
- Sample ID:GSE44404-GSM1084065
- Method: HITS-CLIP
- Chromosome:chr6
- Strand :+
- Binding site start:25974460
- Binding site end:25974480
- Binding signal:14
- P-value:0.00319213
- Genomic position: intron

## TANK

- Gene ID:[ENSG00000136560](#)
- Gene Name: TANK
- RBP:[AGO2](#)
- Sample ID:GSE41437-GSM1020022
- Method: PAR-CLIP
- Chromosome:chr2
- Strand :+
- Binding site start:162092600
- Binding site end:162092620
- Binding signal:22
- P-value:8.88536e-07
- Genomic position:3'UTR

## ATG 5

- Gene ID:[ENSG00000057663](#)
- Gene Name: ATG5
- RBP:[AGO2](#)
- Sample ID:GSE44404-GSM1084068
- Method: HITS-CLIP
- Chromosome:chr6
- Strand :-
- Binding site start:106632780
- Binding site end:106632800
- Binding signal:15
- P-value:0.00079613
- Genomic position:3'UTR

## ATG 12

- Gene ID:[ENSG00000145782](#)
- Gene Name: ATG12
- RBP:[AGO2](#)
- Sample ID:GSE42701-GSM1048187
- Method: HITS-CLIP
- Chromosome:chr5
- Strand :-
- Binding site start:115167220
- Binding site end:115167240
- Binding signal:18
- P-value:0.00794433
- Genomic position:3'UTR

## BECN1

- Gene ID:[ENSG00000126581](#)
- Gene Name: BECN1
- RBP:[AGO2](#)
- Sample ID:GSE28865-GSM714644
- Method: PAR-CLIP
- Chromosome:chr17
- Strand :-
- Binding site start:40962420
- Binding site end:40962440
- Binding signal:29
- P-value:2.98304e-08
- Genomic position:3'UTR

## SOCS1

- Gene ID:[ENSG00000185338](#)
- Gene Name: SOCS1
- RBP:[AGO2](#)
- Sample ID:GSE28865-GSM714644
- Method: PAR-CLIP
- Chromosome:chr16
- Strand :-
- Binding site start:11348400
- Binding site end:11348420
- Binding signal:25
- P-value:2.5004e-07
- Genomic position:3'UTR

## SOCS3

- Gene ID:[ENSG00000184557](#)
- Gene Name: SOCS3
- RBP:[AGO2](#)
- Sample ID:GSE42701-GSM1048188
- Method: HITS-CLIP
- Chromosome:chr17
- Strand :-
- Binding site start:76352920
- Binding site end:76352940
- Binding signal:62
- P-value:4.01318e-06
- Genomic position:3'UTR

## TRIM13

- Gene ID:[ENSG00000204977](#)
- Gene Name: TRIM13
- RBP:[AGO2](#)
- Sample ID:GSE44404-GSM1084044
- Method: HITS-CLIP
- Chromosome:chr13
- Strand :+
- Binding site start:50591100
- Binding site end:50591120
- Binding signal:9
- P-value:0.00312875
- Genomic position: 3'UTR

## EPG5

- Gene ID:[ENSG00000152223](#)
- Gene Name: EPG5
- RBP:[AGO2](#)
- Sample ID:GSE44404-GSM1084047
- Method: HITS-CLIP
- Chromosome:chr18
- Strand :-
- Binding site start:43432360
- Binding site end:43432380
- Binding signal:9
- P-value:0.000552801
- Genomic position:3'UTR

Table T5

| S. No. | Age | Gender | Duration of disease (years) | Disease activity (SLEDAI) | Drugs                | Serum complement level | Anti-nuclear antibody | Anti-dsDNA (IU) | Major organ involved         |
|--------|-----|--------|-----------------------------|---------------------------|----------------------|------------------------|-----------------------|-----------------|------------------------------|
| 1      | 23  | Female | 7                           | 20                        | Pred, HCQS,          | Low                    | Positive              | 212.3           | Nephritis, gangrene          |
| 2      | 26  | Female | 5                           | 24                        | Pred, HCQS           | Low                    | Positive              | >300            | Nephritis                    |
| 3      | 10  | Female | 0.3                         | 6                         | Pred, HCQS           | Low                    | Positive              | >300            | None                         |
| 4      | 29  | Female | 7                           | 2                         | Pred, HCQs,          | Normal                 | Positive              | >300            | Interstitial lung disease    |
| 5      | 35  | Female | 0.5                         | 13                        | Pred, HCQs, Thyroxin | low                    | Positive              | >300            | Nephritis, hemolytic anemia  |
| 6      | 25  | Female | 3                           | 12                        | Pred, HCQS,          | low                    | Positive              | >300            | Nephritis with renal failure |
| 7      | 32  | Female | 4                           | 8                         | Pred, HCQS,          | Low                    | Positive              | >300            | Nephritis                    |
| 8      | 27  | Female | 0.45                        | 25                        | Pred, HCQs,          | Low                    | Positive              | >300            | Nephritis                    |
| 9      | 33  | Female | 8                           | 0                         | Pred                 | not available          | Positive              | <10             | Momoneuritis                 |
| 10     | 20  | Female | 1                           | 8                         | Pred, HCQS,          | Low                    | Positive              | 88.6            | Nephritis                    |
| 11.    | 55  | Female | 7                           | 12                        | Pred, HCQS,          | Low                    | Positive              | >300            | Nephritis                    |
| 12.    | 40  | Female | 0.5                         | 6                         | Pred, MMF, Tac, HCQS | Low                    | Positive              | 130.2           | Nephritis                    |
| 13.    | 22  | Female | 6                           | 4                         | none                 | Low                    | Positive              | <10             | None                         |

Pred: Prednisolone, MMF: Mycophenolate mofetil, Tac: Tacrolimus, HCQS: Hydroxychloroquine

|                                       | Baseline<br>(n=7)   | Post-treatment<br>(n=7) | <i>p</i> -value |
|---------------------------------------|---------------------|-------------------------|-----------------|
| Median age (range)                    | 32(23-60)           | -                       |                 |
| Male                                  | 7                   | -                       |                 |
| AST<br>(reference range: 10 - 40 U/L) | 48.28(24.02-111.31) | 41.57(25.28-91.2)       |                 |
| ALT<br>(reference range:7-56U/L)      | 27.27(19-47.6)      | 21.81(16.36-57.27)      |                 |
| HbeAg                                 | 4 positive          | 4 positive              |                 |
| HBV DNA Load log10<br>(IU/mL)         | 6.55(3.5-7.56)      | 3.2(1.28-3.94)          |                 |
| hsa-miR-30e-5p<br>(fold change/U6)    | 1.179(0.83-1.42)    | 0.199(0.046-1.34)       | 0.0313*         |

Data expressed as median (range); Baseline (before treatment); AST (aspartate transaminase); ALT (alanine transaminase); HBsAg (Hepatitis B surface Antigen); Anti-HBcIgM (IgM antibody to hepatitis B core antigen); HBeAg (Hepatitis B e-Antigen); hsa-miR-30e-5p (Human Micro(mi)-RNA-30e).

## Real Time PCR primers

5'-----sequence-----3'

|                    |                                  |
|--------------------|----------------------------------|
|                    | ATG12_Rv                         |
|                    | BECN1_Fw                         |
|                    | BECN1_Rv                         |
| 18S_Fw             | CTGCTTTCCTCAACACCACA             |
| 18S_Rv             | ATCCCTGAAAAGTTCCAGCA             |
| HBV RNA_Fw         | GCACTTCGCTTCACCTCTGC             |
| HBV RNA_Rv         | CTCAAGGTCGGTCGTTGACA             |
| HBVcccDNA_Fw       | GGACTTGAATGTACGTTGGGG            |
| HBVcccDNA_Rv       | GGACTTGAATGTACGTTGGG             |
| HBV DNA_Fw         | ATGGAGAACACAACATCAGG             |
| HBV DNA_Rv         | GAGGCATAGCAGCAGGATG              |
| NDV_Fw             | GGAGGATGTTGGCAGCATT              |
| NDV_Rv             | GTCACATATACACCTCATC              |
| SeV_Fw             | CAGAGGAGCACAGTCTCAGTGTTT         |
| SeV_Rv             | TCTCTGAGAGTGTGCTTATCTGTGT        |
| HCMV_GLYB_Fw       | AAGTACCCTATCGCGTGTG              |
| HCMV_GLYB_Rv       | ATGATGCCCTCATCCAAGTC             |
| IFIT1_Fw           | TCAGGTCAAGGATAGTCTGGAG           |
| IFIT1_Rv           | AGGTTGTGTATTTCCACACTGTA          |
| IFNa_Fw            | TGCTTTACTGATGGTCTGTGT            |
| IFNa_Rv            | TCATGTCTGTCCATCAGACAG            |
| IFNb_Fw            | AGCTGCAGCAGTTCAGAAAG             |
| IFNb_Rv            | AGTCTCATTTCCAGCCAGTGC            |
| IFN1_Fw            | CGCCTTGAAGAGTCACTCA              |
| IFN1_Rv            | GAAGCCTCAGGTCCCAATTC             |
| IL6_Fw             | CTCAGCCCTGAGAAAGGAGA             |
| IL6_Rv             | CCAGGCAAGTCTCCTCATTG             |
| OAS1_Fw            | GAGCTCCAGGGCATACTGAG             |
| OAS1_Rv            | CCAAGCTCAAGAGCCTCATC             |
| IP10_Fw            | TGGCATTCAAGGAGGTACCTCTC          |
| IP10_Rv            | TGATCTCAACAGTGGACAAA             |
| TLR-3_Fw           | TTGCCTTGATCTACTTTTGGGG           |
| TLR-3_Rv           | TCAACTGTTATATTTGTGGGT            |
| TLR-7_Fw           | TCAAGCCTTAGATTGGCGATGTC          |
| TLR-7_Rv           | CCAGATTGATTTGGGAATTTGTG          |
| TLR-9_Fw           | AGTCTCGACCTGGCAGGAA              |
| TLR-9_Rv           | CGGTTGGCGCTAAGGTTGA              |
| miR_30e_5p_Prom_Fw | CGCGGTACCCTTAACATACTAAATATGTTGGG |
| miR_30e_5p_Prom_Rv | CGCAAGCTTGTAGCAAAGACTGCCAGAAAG   |
| mIL6_Fw            | CCTCTGGTCTTCTGGAGTACC            |
| mIL6_Rv            | ACTCCTTCTGTGACTCCAGC             |
| mIP10_Fw           | ACCATGAACCCAAAGTGCTG             |
| mIP10_Rv           | GTGGCAATGATCTCAACACG             |
| mTNFa_Fw           | ATGAGCACAGAAAGCATGA              |
| mTNFa_Rv           | AGTAGACAGAAAGCGTGGT              |
| ATG5_Fw            | ACTAGTGACCAGAAACTTCGCTGC         |
| ATG5_Rv            | ACGCGTTTCCTCTAGGCATTGTAGGC       |
| ATG12_Fw           | TTCCAACCTCTTGGTCTGGG             |

5'-----sequence-----3'

|           |                          |
|-----------|--------------------------|
|           | AGAAGTGGGCAGTAGAGCGA     |
|           | TGTCCTCGCAGATTCATCC      |
|           | ACGTTGAGCTGAGTGTCCAG     |
| SOCS1_Fw  | CACATGGTTCCAGGCAAGTA     |
| SOCS1_Rv  | CTACCTGAGCTCCTTCCCCT     |
| SOCS3_Fw  | TCCCCCAGAAGAGAGCCTATTAC  |
| SOCS3_Rv  | TCCGACAGAGATGCTGAACCATCC |
| TANK_Fw   | CCTCTTCGCTCTGTAGCATCA    |
| TANK_Rv   | GCATTGTTAGAGCCTGTGGA     |
| TRIM38_Fw | GAAGACGTATGCCAGGGCTAC    |
| TRIM38_Rv | GGAGATTC'TTAAAGTCAGACCGG |
| m18S_Fw   | GTAACCCGTTGAACCCCAT      |
| m18S_Rv   | CCATCCAATCGGTAGTAGCG     |
| matg5_Fw  | GACAAAGATGTGCTTCGAGATGTG |
| matg5_Rv  | GTAGCTCAGATGCTCGCTCAG    |
| matg12_Fw | TGGCCTCGGAACAGTTGTTTA    |
| matg12_Rv | GGGCAAAGGACTGATTCACAT    |
| msocs1_Fw | TCCGATTACCGGCGCATCAGC    |
| msocs1_Rv | CTCCAGCAGCTCGAAAAGGCA    |
| msocs3_Fw | CACAGCAAGTTTCCCGCCGCC    |
| msocs3_Rv | GTGCACCAGCTTGAGTACACA    |

## Cloning Primers (5'-----sequence-----3')

|                       |                                     |
|-----------------------|-------------------------------------|
| ATG5_UTR_Spe_Fw       | ATAAACTAGTGACCAGAAACTTCGCTGC        |
| ATG5_UTR_MluI_Rv      | ATAAACGCGTTTCTCTAGGGCATTGTAGGC      |
| ATG5_UTR_SDM_Fw       | AATGACTTTGATAATGAACAGTGAG           |
| ATG5_UTR_SDM_Rv       | TGTAGTTAAGGAAAGATGGGTTTAC           |
| ATG12_UTR_Spe_Fw      | ATAAACTAGTCACGGAAGAGACAGCTCTGA      |
| ATG12_UTR_HindIII_Rv  | ATAAAAGCTTGGCACTCAATATGTGAATGACAG   |
| BECN1_UTR_Fw_SpeI     | ACTAGTGGGAGGTTTGCCTTAAAGGC          |
| BECN1_UTR_Rv_MluI     | ACGCGTGGCAGTTTTTCAGACTGCAGC         |
| BECN1_UTR_SDM_Fw      | AATAAGAAAAATCCACAAAAGC              |
| BECN1_UTR_SDM_Rv      | TGTATACCCGAATTTAATTTAAACATG         |
| SOCS1_UTR_HindIII_Fw  | AAGCTTGATGGTAGCACACAACCAGGTG        |
| SOCS1_UTR_Sali_Rv     | GTCGACTAAAGCCAGACCCTCCC             |
| SOCS1_UTR_SDM_Fw      | TATGCTTTGCACAAAACCAGGGG             |
| SOCS1_UTR_SDM_Rv      | AGTATAGGAGGTGCGAGTTCAG              |
| SOCS3_UTR_SpeI_Fw     | ACTAGTAAGGGCGCAAAGGCAT              |
| SOCS3_UTR_HindIII_Rv  | AAGTTTAGCCTCAAGGCCTGAG              |
| SOCS3_UTR_SDM_Fw      | TATGTCACTCTGTCTTTTATAAAGATTC        |
| SOCS3_UTR_SDM_Rv      | AGTAGAAAACAAACAAAAATAGAGAAAAAAC     |
| TANK_UTR_Fw_SpeI      | ACTAGTGACATTTGAAAACAGACATATCAAG     |
| TANK_UTR_Rv_HindIII   | AAGCTTGACACATTTGAAAACAGACATATCAAG   |
| TANK_UTR_SDM_Fw       | TATGTAATTCAAAATATATGTATGTGACTTAG    |
| TANK_UTR_SDM_Rv       | AGTAATTACAGTTTTTATACAGAATTTTTTTTGT  |
| TRIM38_UTR_Spe_Fw     | ACTAGTGATGGGGATTTCAGTCTGG           |
| TRIM38_UTR_HindIII_Rv | AAGCTTGCTGGGTGAGCATAACCGAG          |
| TRIM38_UTR_SDM_Fw     | TTAAACAATCTGATATTTGTTGAAGTCTTAC     |
| TRIM38_UTR_SDM_Rv     | TCAGATTTGTTTAAATTTTTTTTTTCTTGAGGCAC |
